# Supplementary material for: A suppression hierarchy among competing motor programs drives sequential grooming in Drosophila
Source: PubMed Central journal article supplement (PMC4136539; doi:10.7554/elife.02951), 2014-08-19
Supplement: elife02951s001.pdf [file elife02951s001.pdf]

GENERAL NOTES:

- 1. MATERIAL: (SEE PARTS LIST)
- 2. SPECIAL FINISH:
- 3. SURFACE ROUGHNESS (UNLESS SPECIFIED OTHERWISE):
- 4. INTERPRET DIMENSIONS AND TOLERANCES PER ASME Y14.5M-1994
- 5. DEBURR AND BREAK ALL SHARP EDGES, MAX 0.010" (UNLESS SPECIFIED OTHERWISE)
- 6. PARTS ARE TO BE CLEAN AND FREE OF OIL, GREASE, AND OTHER CONTAMINANTS
- 7. DIMENSIONS INCLUDE CHEMICALLY APPLIED FINISHES IF APPLICABLE

| ZONE |  | REV | REVISION HISTORY DESCRIPTION | DATE | APPROVED |
|------|--|-----|------------------------------|------|----------|
|      |  |     |                              |      |          |

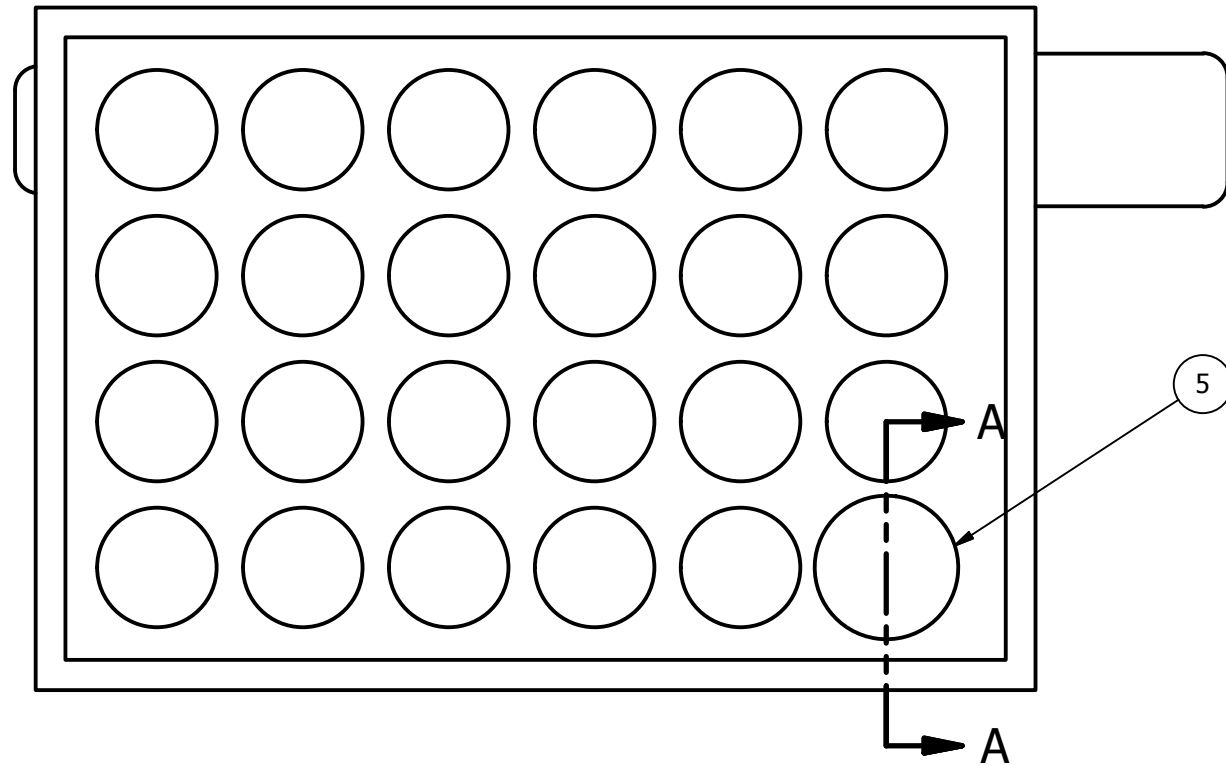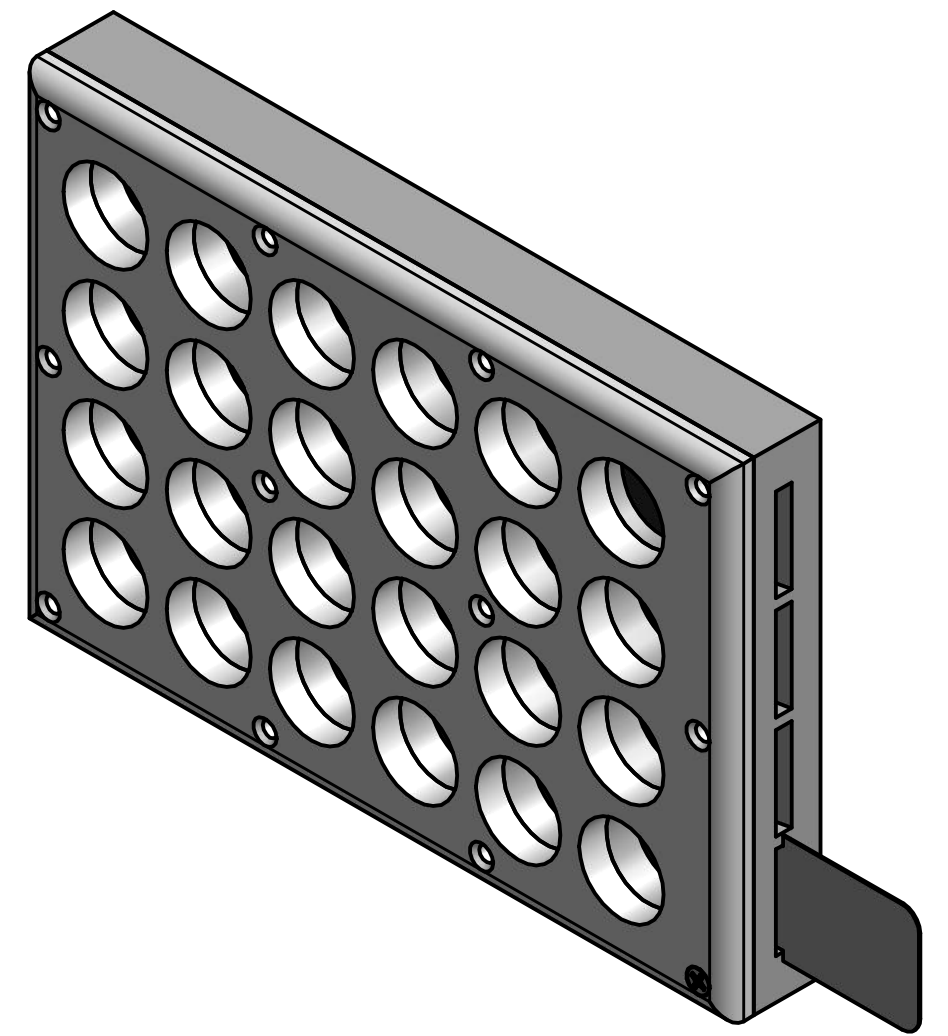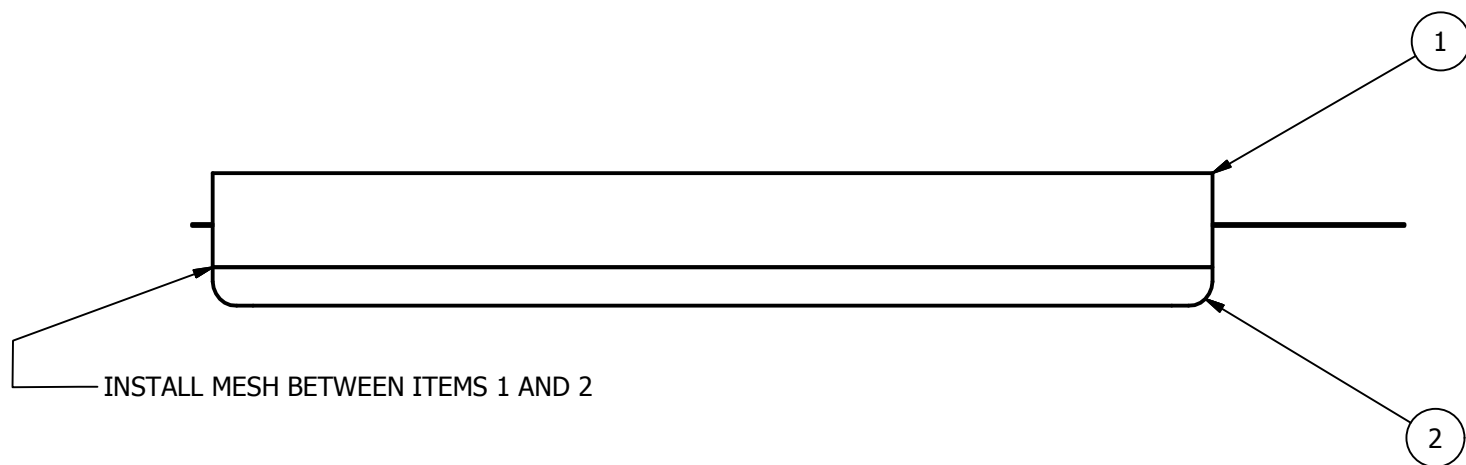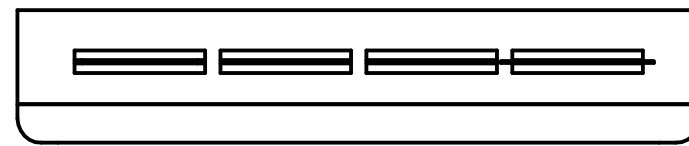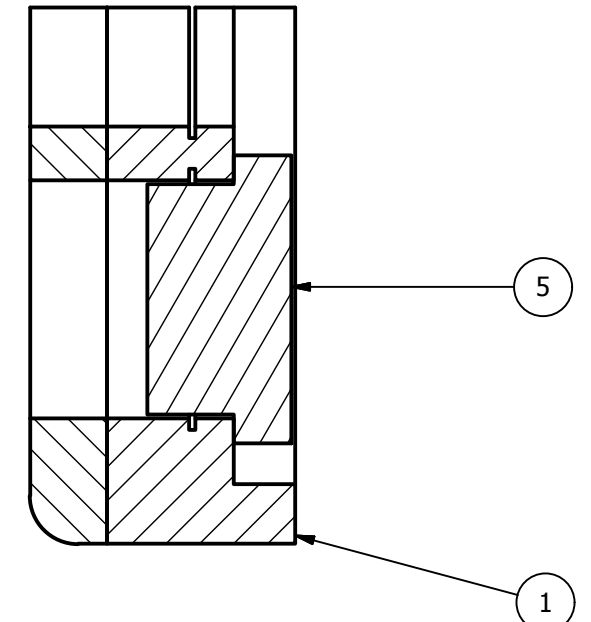

SECTION A-A  
SCALE 2:1

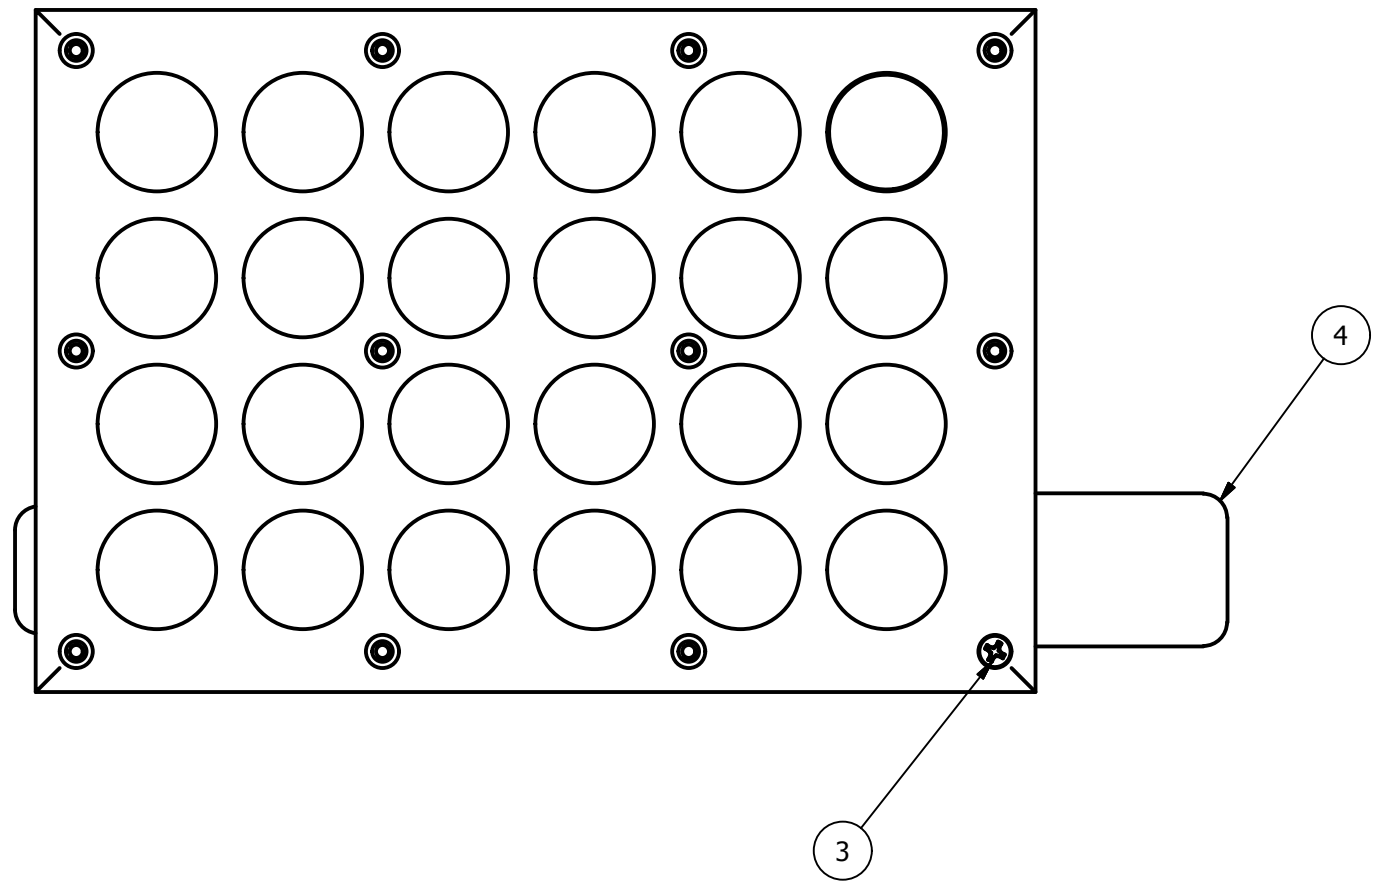

| ITEM       | QTY | FILE NAME                               | REV | PART NUMBER                       | DESCRIPTION |
|------------|-----|-----------------------------------------|-----|-----------------------------------|-------------|
| 1          | 1   | 24 CHAMBER COMPARTMENTS.ipt             |     | 24 CHAMBER COMPARTMENTS           |             |
| 2          | 1   | 24 CHAMBER SCREEN HOLDER.ipt            |     | 24 CHAMBER SCREEN HOLDER          |             |
| 3          | 12  | 2-56X5-16 FLATHEAD SCREW.ipt            |     | 2-56X5-16 FLATHEAD SCREW          |             |
| 4          | 1   | 24 CHAMBER PARTITION SLIDE - SINGLE.ipt |     | 24 CHAMBER PARTITION SLIDE-SINGLE |             |
| 5          | 1   | 24 CHAMBER VIEWING GLASS.ipt            |     | 24 CHAMBER VIEWING GLASS          |             |
| PARTS LIST |     |                                         |     |                                   |             |

NOTICE:  
INFORMATION CONTAINED IN THIS DOCUMENT OR ANY REPRODUCTION THEREOF, IS PROPRIETARY INFORMATION AND PROPERTY OF HOWARD HUGHES MEDICAL INSTITUTE. IT SHALL NOT BE DISCLOSED, COPIED, DUPLICATED OR USED FOR MANUFACTURE, PRODUCTION OR PROCUREMENT, WITHOUT THE EXPRESS WRITTEN PERMISSION OF HOWARD HUGHES MEDICAL INSTITUTE.

(UNLESS SPECIFIED OTHERWISE)  
PRIMARY UNITS: INCHES  
[SECONDARY UNITS]: MILLIMETERS

PRIMARY TOLERANCES:  
 X.X ± 0.020  
 X.XX ± 0.010  
 X.XXX ± 0.005  
 X.XXXX ± 0.0005  
 ANGULAR ± 0.5 DEG

- DO NOT SCALE DRAWING -  
THIRD ANGLE PROJECTION:

**HHMI**  
HOWARD HUGHES MEDICAL INSTITUTE

HHMI  
*janelia farm*  
research campus

**24-well chamber assembly**

|           |                  |          |                 |
|-----------|------------------|----------|-----------------|
| SIZE<br>C | PART NUMBER<br>1 | REV<br>0 | SHEET<br>1 OF 1 |
|-----------|------------------|----------|-----------------|

GENERAL NOTES:

- 1. MATERIAL: VERO WHITE
- 2. SPECIAL FINISH:
- 3. SURFACE ROUGHNESS (UNLESS SPECIFIED OTHERWISE):
- 4. INTERPRET DIMENSIONS AND TOLERANCES PER ASME Y14.5M-1994
- 5. DEBURR AND BREAK ALL SHARP EDGES, MAX 0.010" (UNLESS SPECIFIED OTHERWISE)
- 6. PARTS ARE TO BE CLEAN AND FREE OF OIL, GREASE, AND OTHER CONTAMINANTS
- 7. DIMENSIONS INCLUDE CHEMICALLY APPLIED FINISHES IF APPLICABLE

| ZONE |  | REV | REVISION HISTORY<br>DESCRIPTION | DATE | APPROVED |
|------|--|-----|---------------------------------|------|----------|
|      |  |     |                                 |      |          |

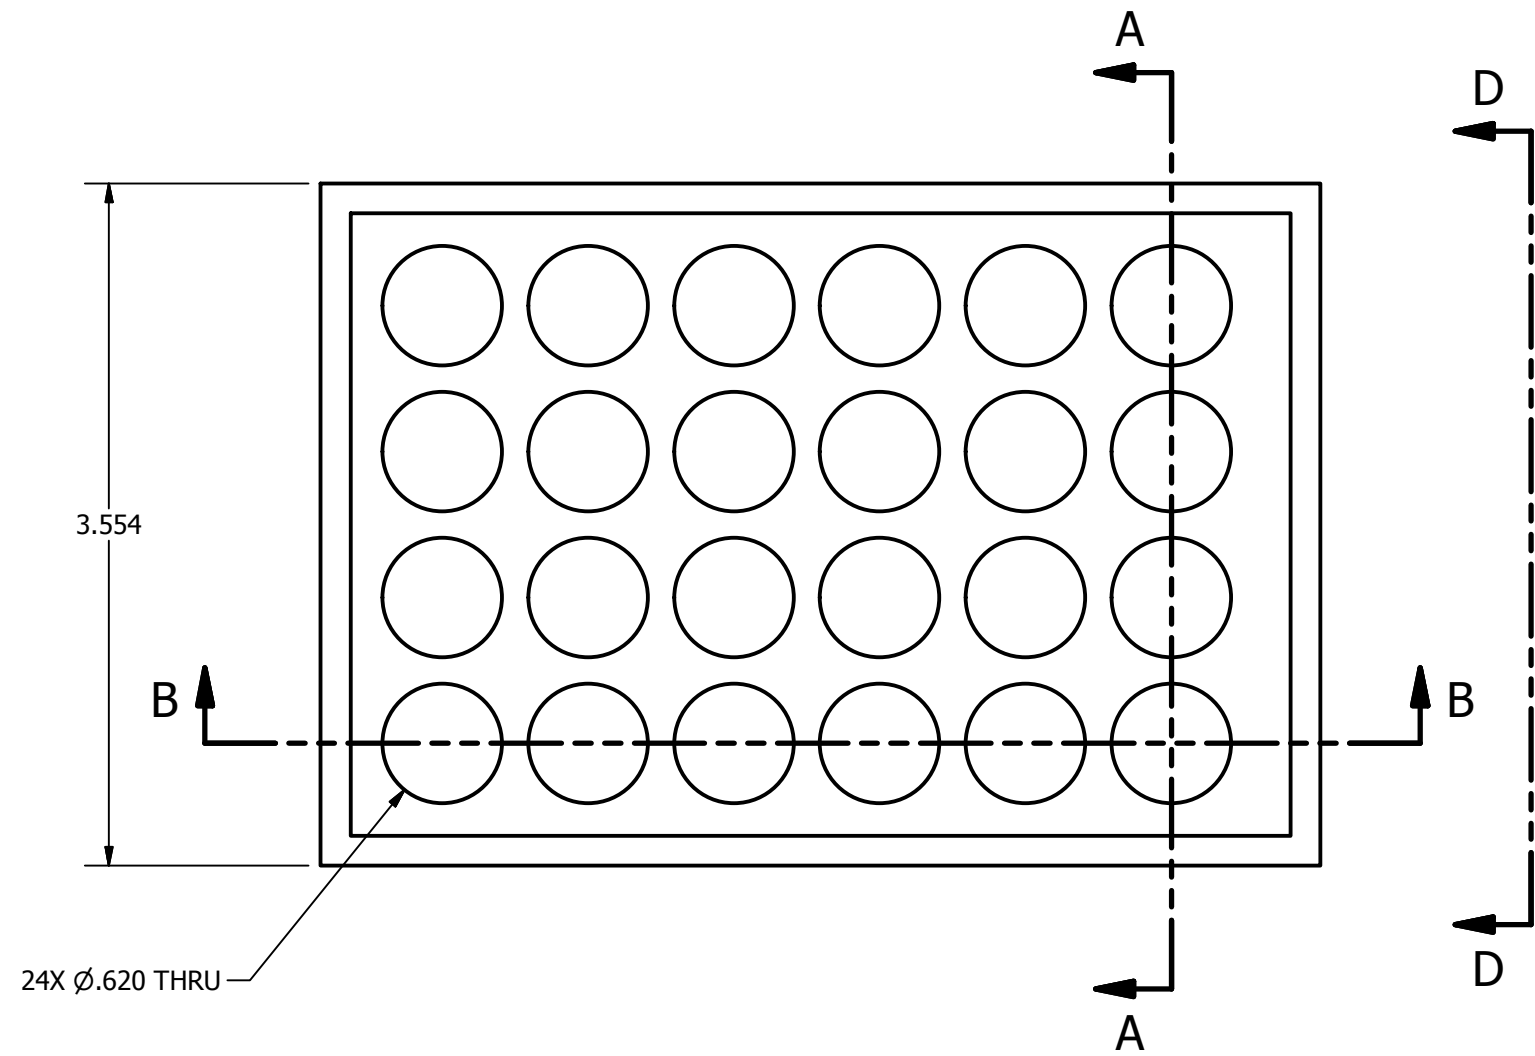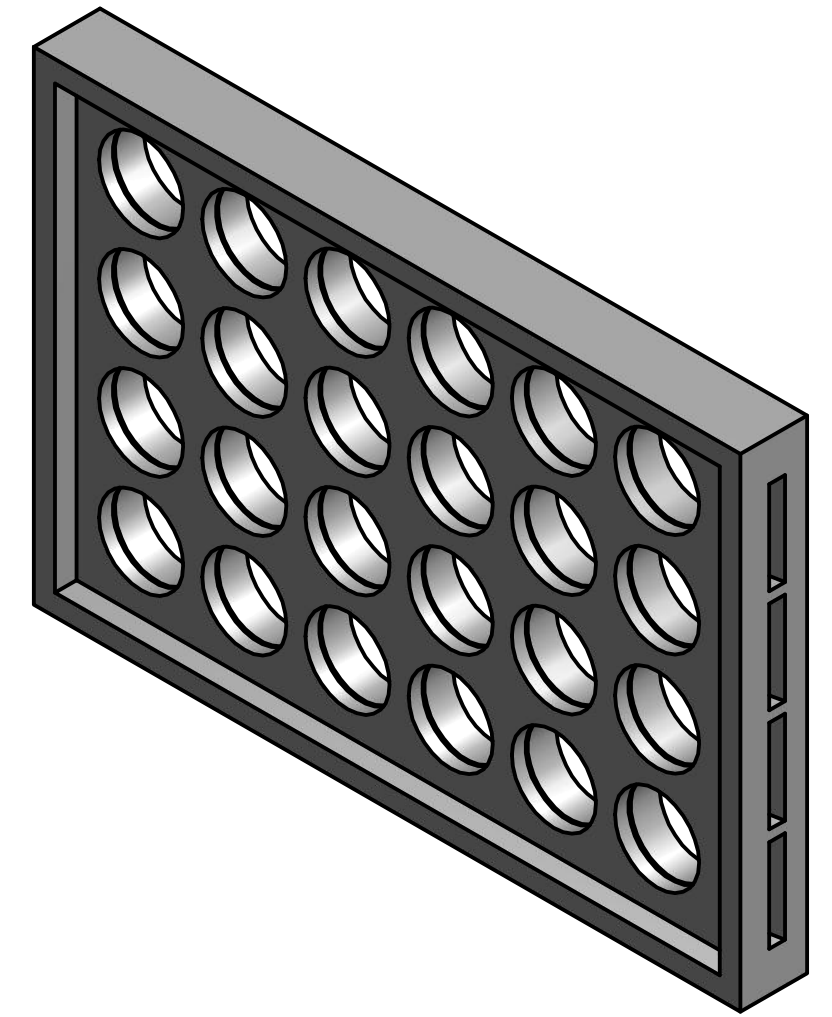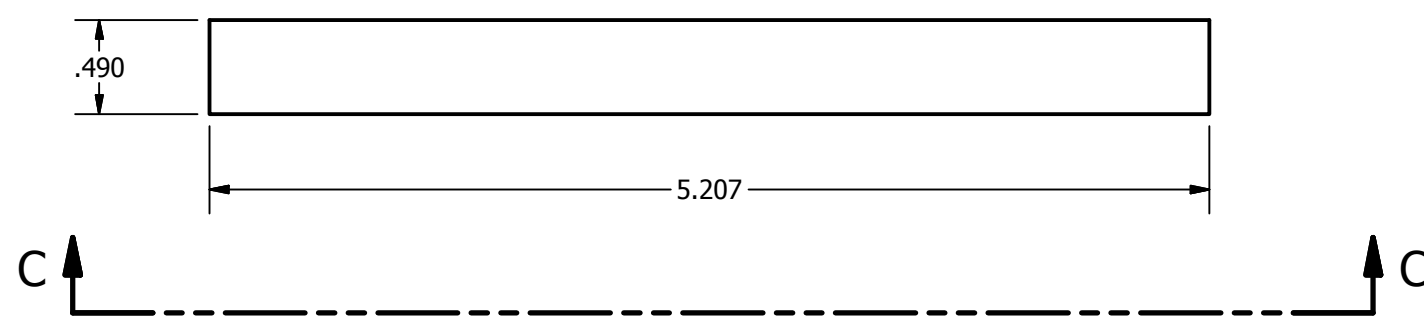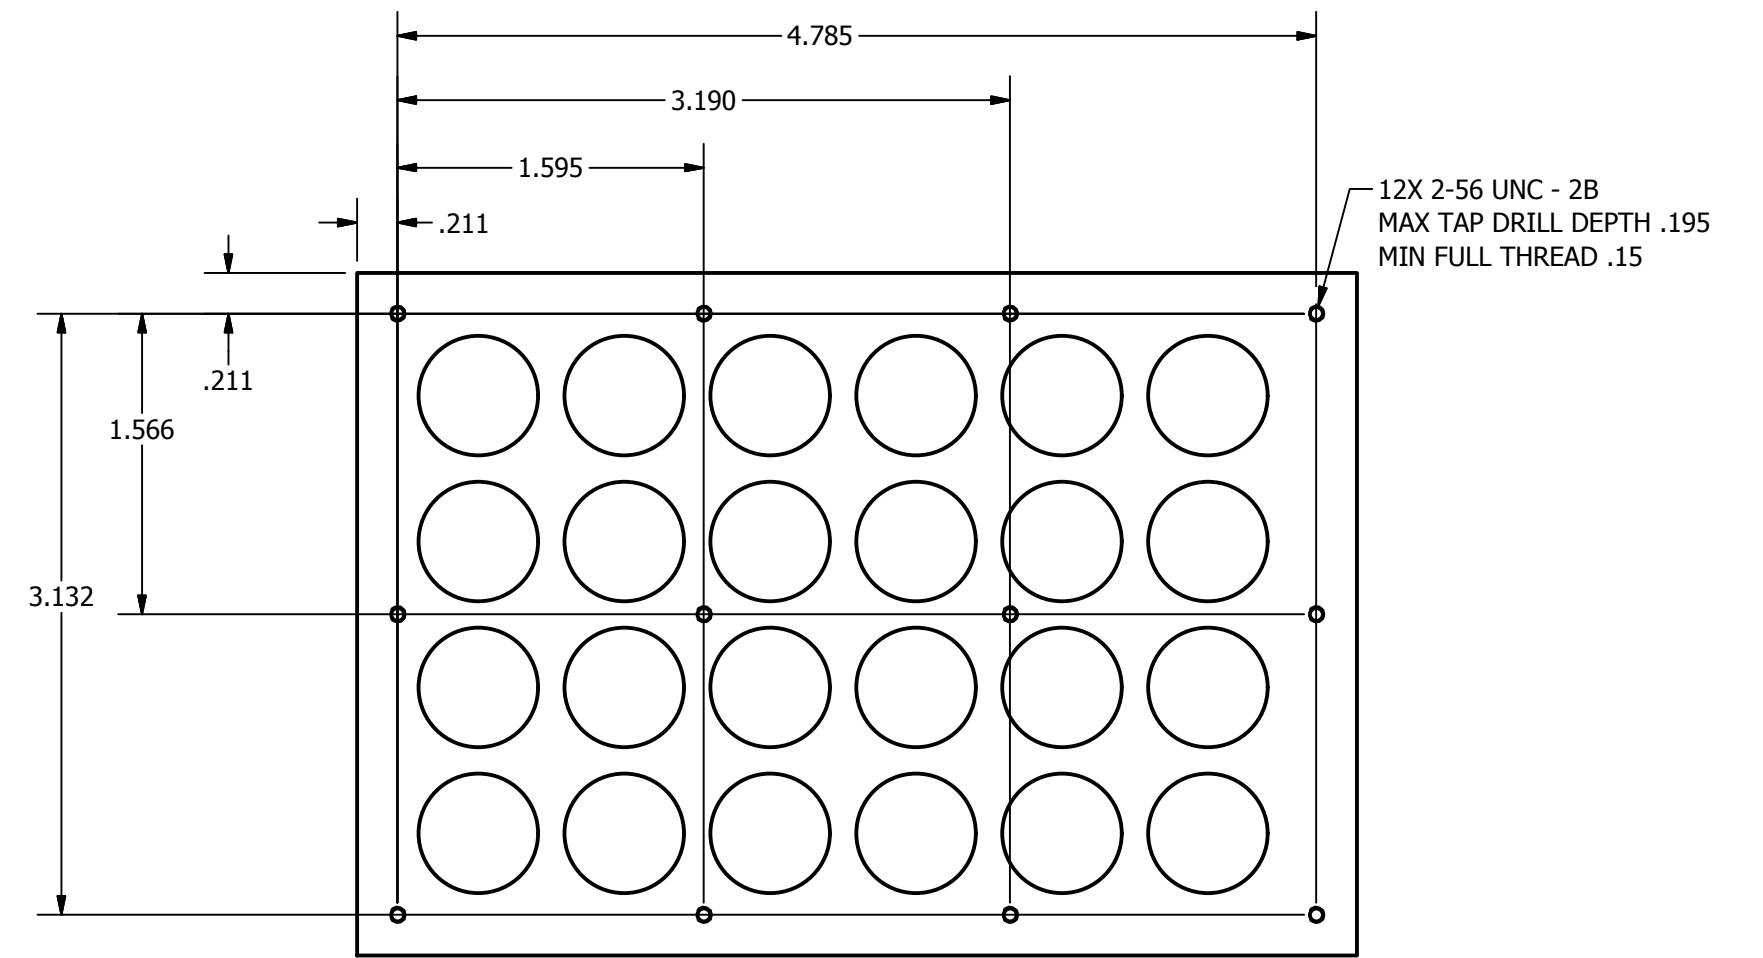

VIEW C-C

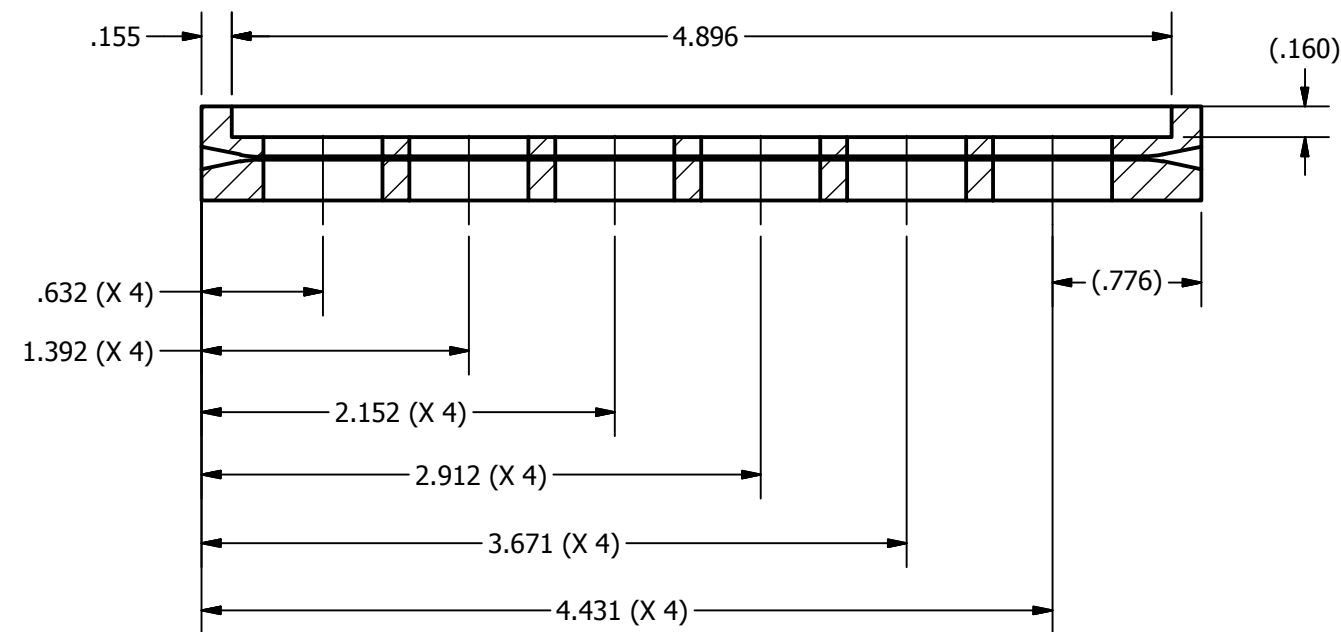

SECTION B-B

NOTICE:  
 INFORMATION CONTAINED IN THIS DOCUMENT OR ANY REPRODUCTION THEREOF, IS PROPRIETARY INFORMATION AND PROPERTY OF HOWARD HUGHES MEDICAL INSTITUTE. IT SHALL NOT BE DISCLOSED, COPIED, DUPLICATED OR USED FOR MANUFACTURE, PRODUCTION OR PROCUREMENT, WITHOUT THE EXPRESS WRITTEN PERMISSION OF HOWARD HUGHES MEDICAL INSTITUTE.

(UNLESS SPECIFIED OTHERWISE)  
 PRIMARY UNITS: INCHES  
 [SECONDARY UNITS]: MILLIMETERS

PRIMARY TOLERANCES:  
 X.X ± 0.020  
 X.XX ± 0.010  
 X.XXX ± 0.005  
 X.XXXX ± 0.0005  
 ANGULAR ± 0.5 DEG

- DO NOT SCALE DRAWING -  
 THIRD ANGLE PROJECTION:

**HHMI**  
 HOWARD HUGHES MEDICAL INSTITUTE

HHMI  
 janelia farm  
 research campus

24 CHAMBER COMPARTMENTS.ipt

|           |                                  |     |                 |
|-----------|----------------------------------|-----|-----------------|
| SIZE<br>C | PART NUMBER<br><b>24 CHAMBER</b> | REV | SHEET<br>1 OF 2 |
|-----------|----------------------------------|-----|-----------------|

COMPARTMENTS

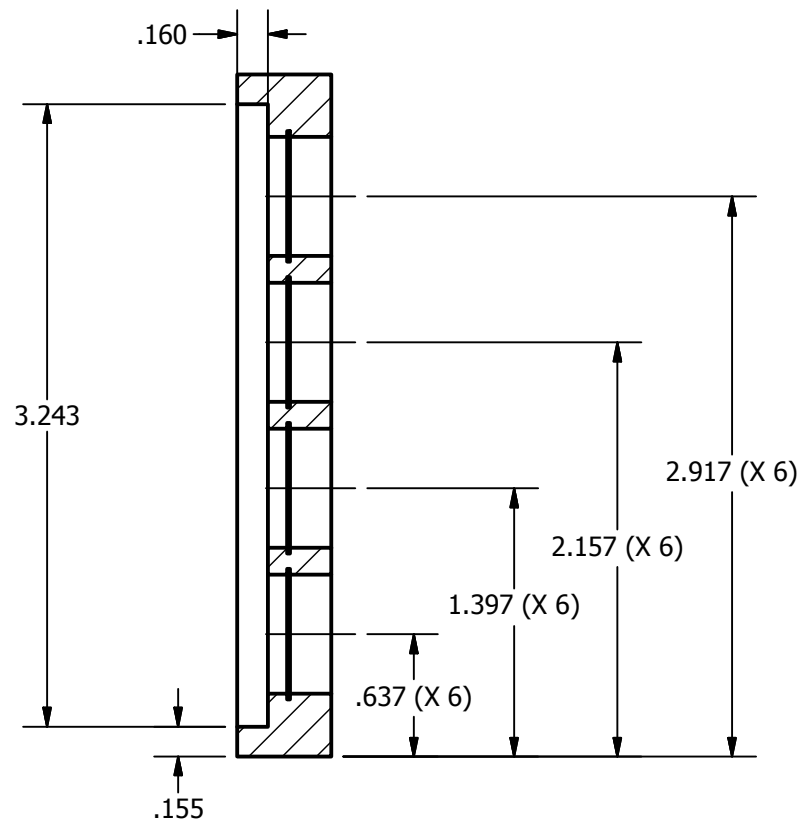

SECTION A-A

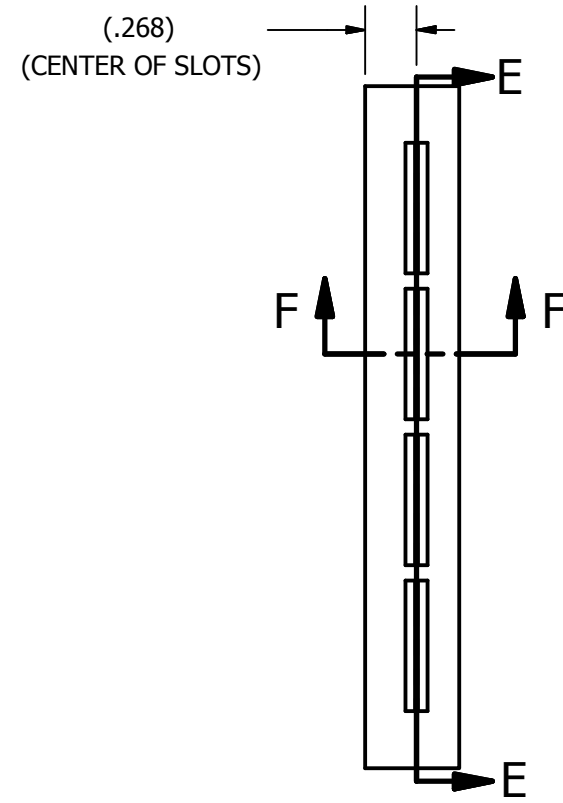

VIEW D-D

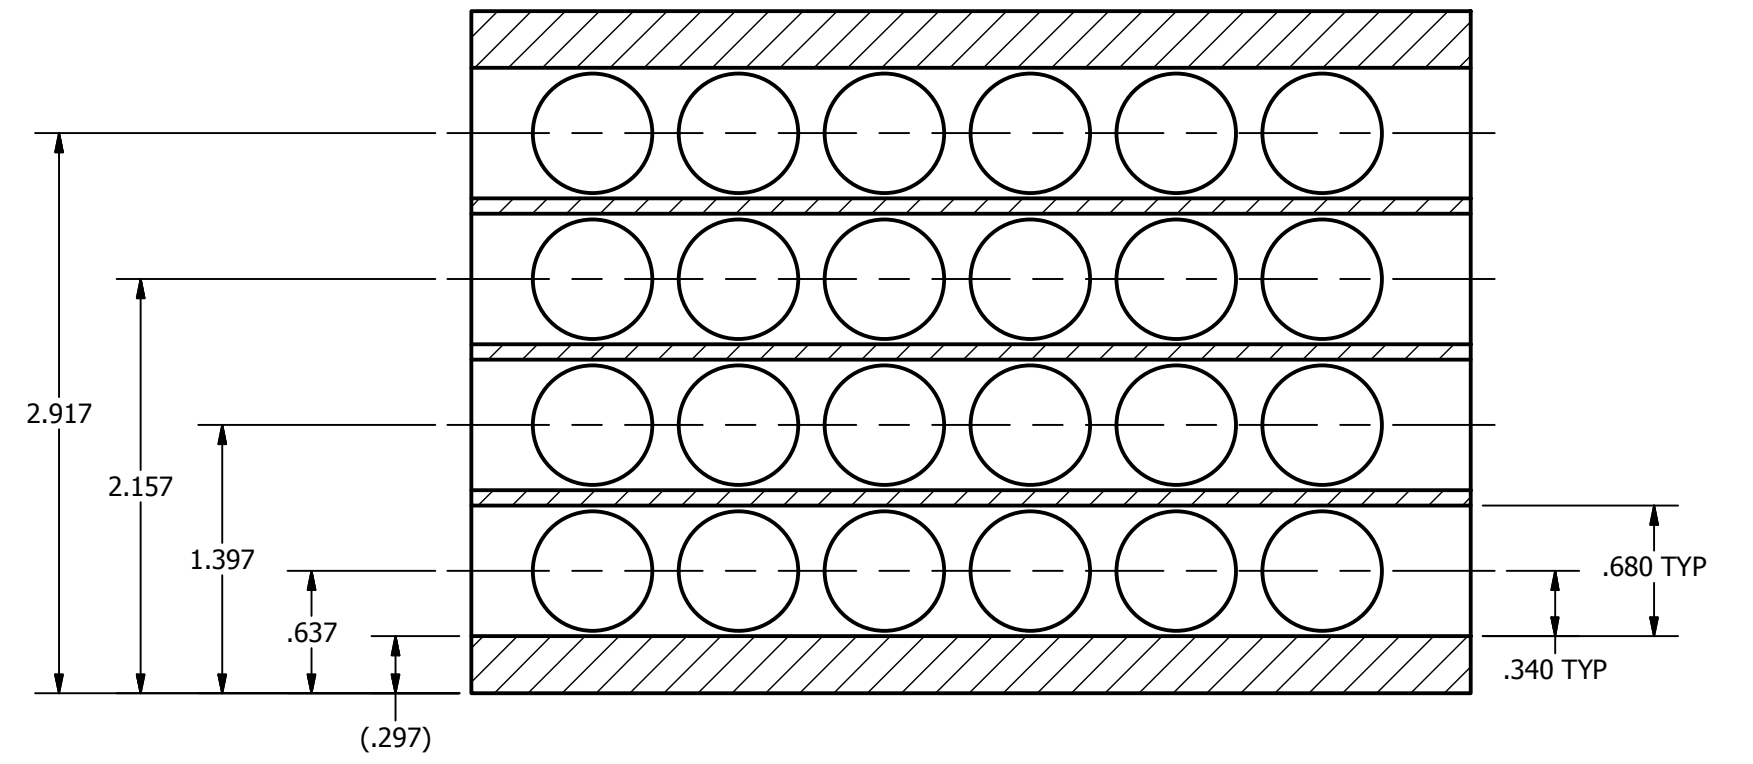

SECTION E-E

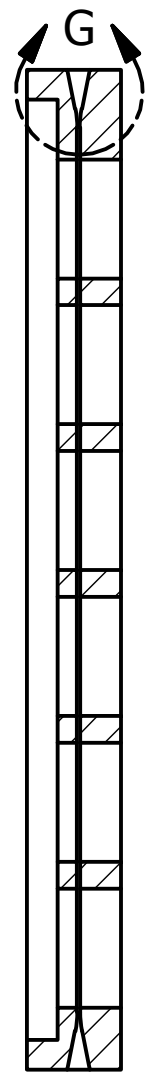

SECTION F-F

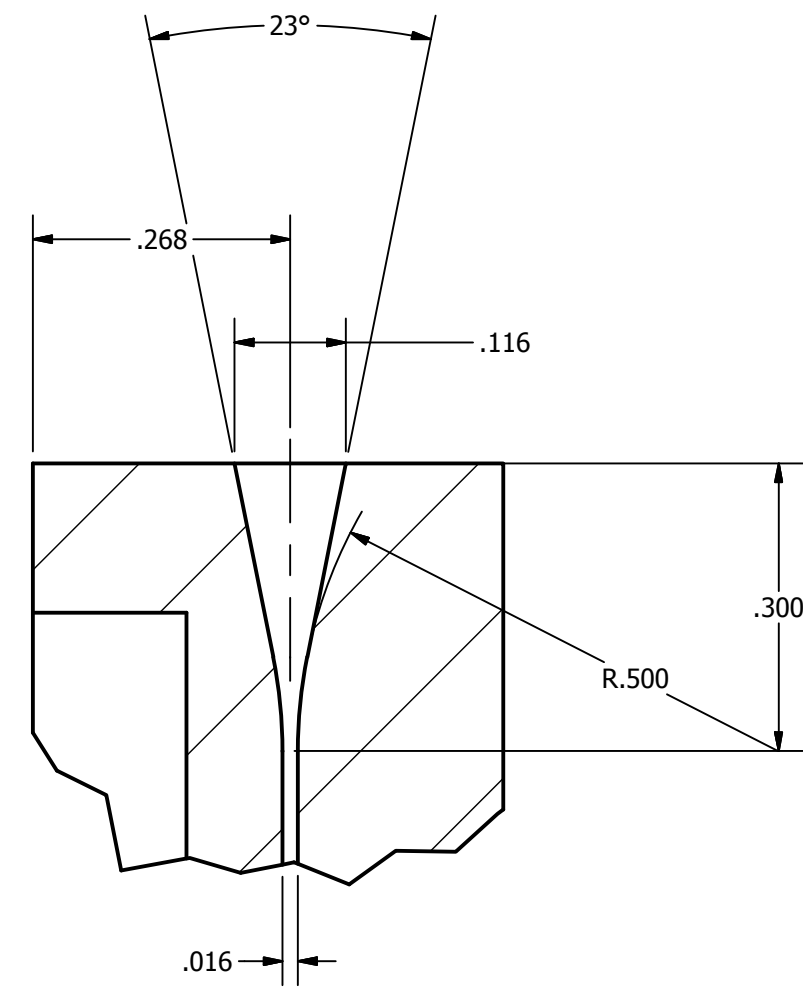

DETAIL G  
TYP FOR 4 SLOTS  
SCALE 5:1

NOTICE:  
INFORMATION CONTAINED IN THIS DOCUMENT OR ANY REPRODUCTION THEREOF, IS PROPRIETARY INFORMATION AND PROPERTY OF HOWARD HUGHES MEDICAL INSTITUTE. IT SHALL NOT BE DISCLOSED, COPIED, DUPLICATED OR USED FOR MANUFACTURE, PRODUCTION OR PROCUREMENT, WITHOUT THE EXPRESS WRITTEN PERMISSION OF HOWARD HUGHES MEDICAL INSTITUTE.

(UNLESS SPECIFIED OTHERWISE)  
PRIMARY UNITS: INCHES  
[SECONDARY UNITS]: MILLIMETERS

PRIMARY TOLERANCES:  
 X.X ± 0.020  
 X.XX ± 0.010  
 X.XXX ± 0.005  
 X.XXXX ± 0.0005  
 ANGULAR ± 0.5 DEG

- DO NOT SCALE DRAWING -  
THIRD ANGLE PROJECTION:

**HHMI**  
HOWARD HUGHES MEDICAL INSTITUTE

HHMI  
janelia farm  
research campus

24 CHAMBER COMPARTMENTS.ipt

|           |                                  |     |                 |
|-----------|----------------------------------|-----|-----------------|
| SIZE<br>C | PART NUMBER<br><b>24 CHAMBER</b> | REV | SHEET<br>2 OF 2 |
|-----------|----------------------------------|-----|-----------------|

COMPARTMENTS

GENERAL NOTES:

- 1. MATERIAL: VERO WHITE
- 2. SPECIAL FINISH:
- 3. SURFACE ROUGHNESS (UNLESS SPECIFIED OTHERWISE):
- 4. INTERPRET DIMENSIONS AND TOLERANCES PER ASME Y14.5M-1994
- 5. DEBURR AND BREAK ALL SHARP EDGES, MAX 0.010" (UNLESS SPECIFIED OTHERWISE)
- 6. PARTS ARE TO BE CLEAN AND FREE OF OIL, GREASE, AND OTHER CONTAMINANTS
- 7. DIMENSIONS INCLUDE CHEMICALLY APPLIED FINISHES IF APPLICABLE

| ZONE |  | REV | REVISION HISTORY DESCRIPTION | DATE | APPROVED |
|------|--|-----|------------------------------|------|----------|
|      |  |     |                              |      |          |

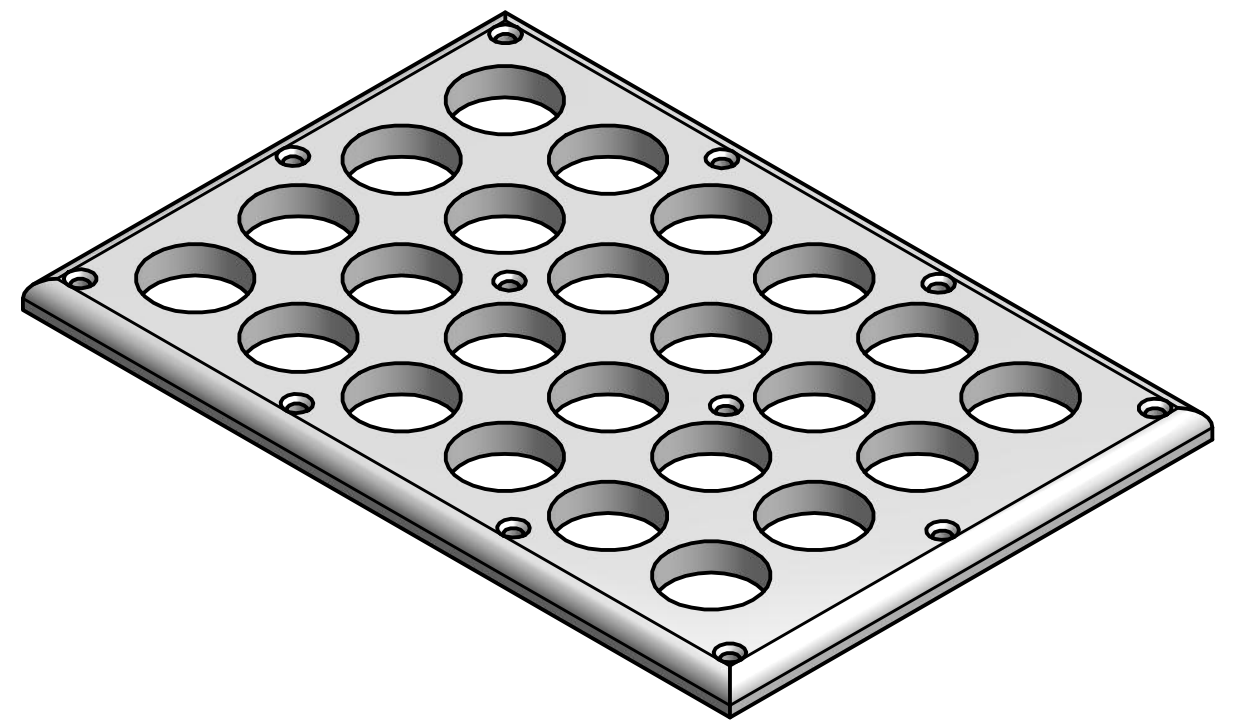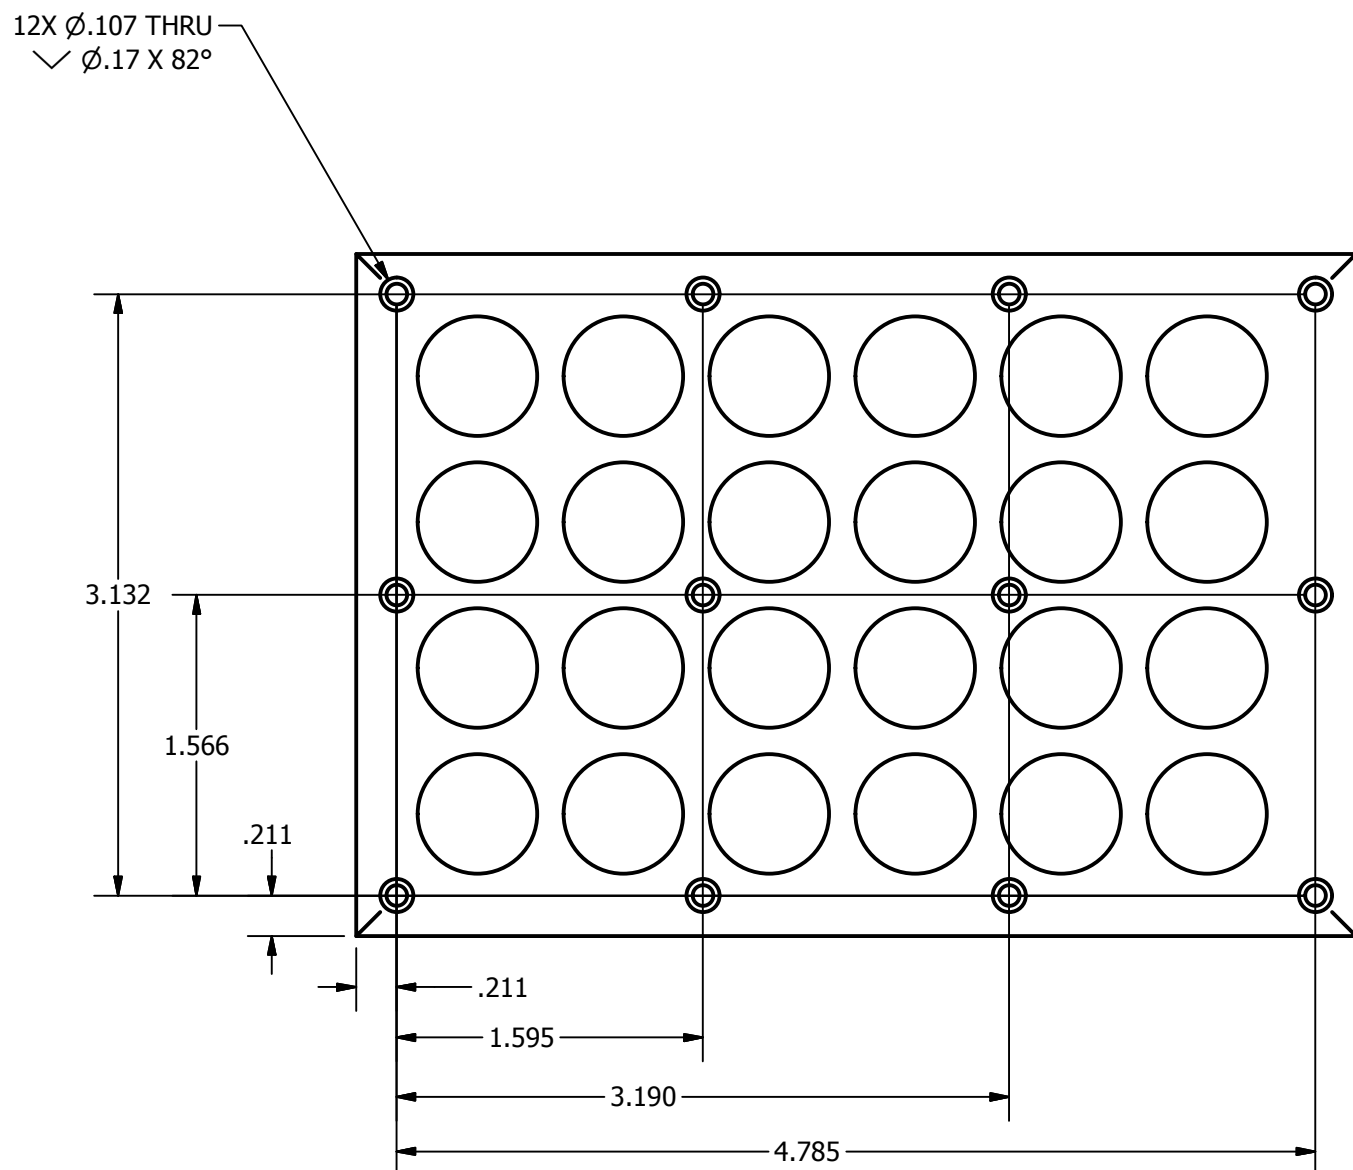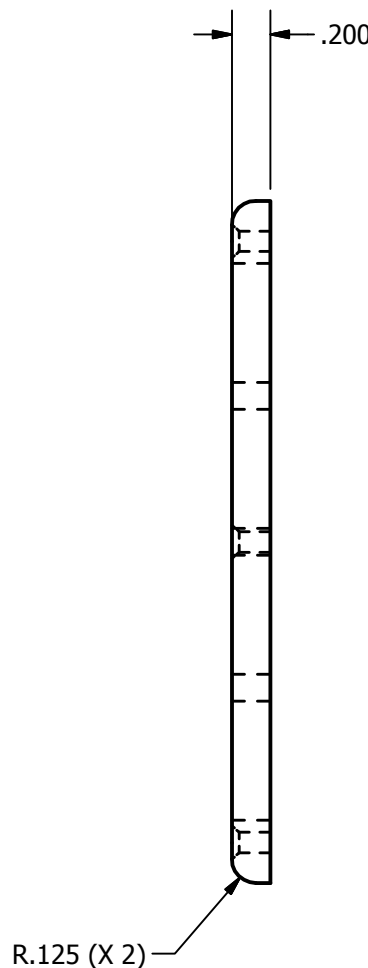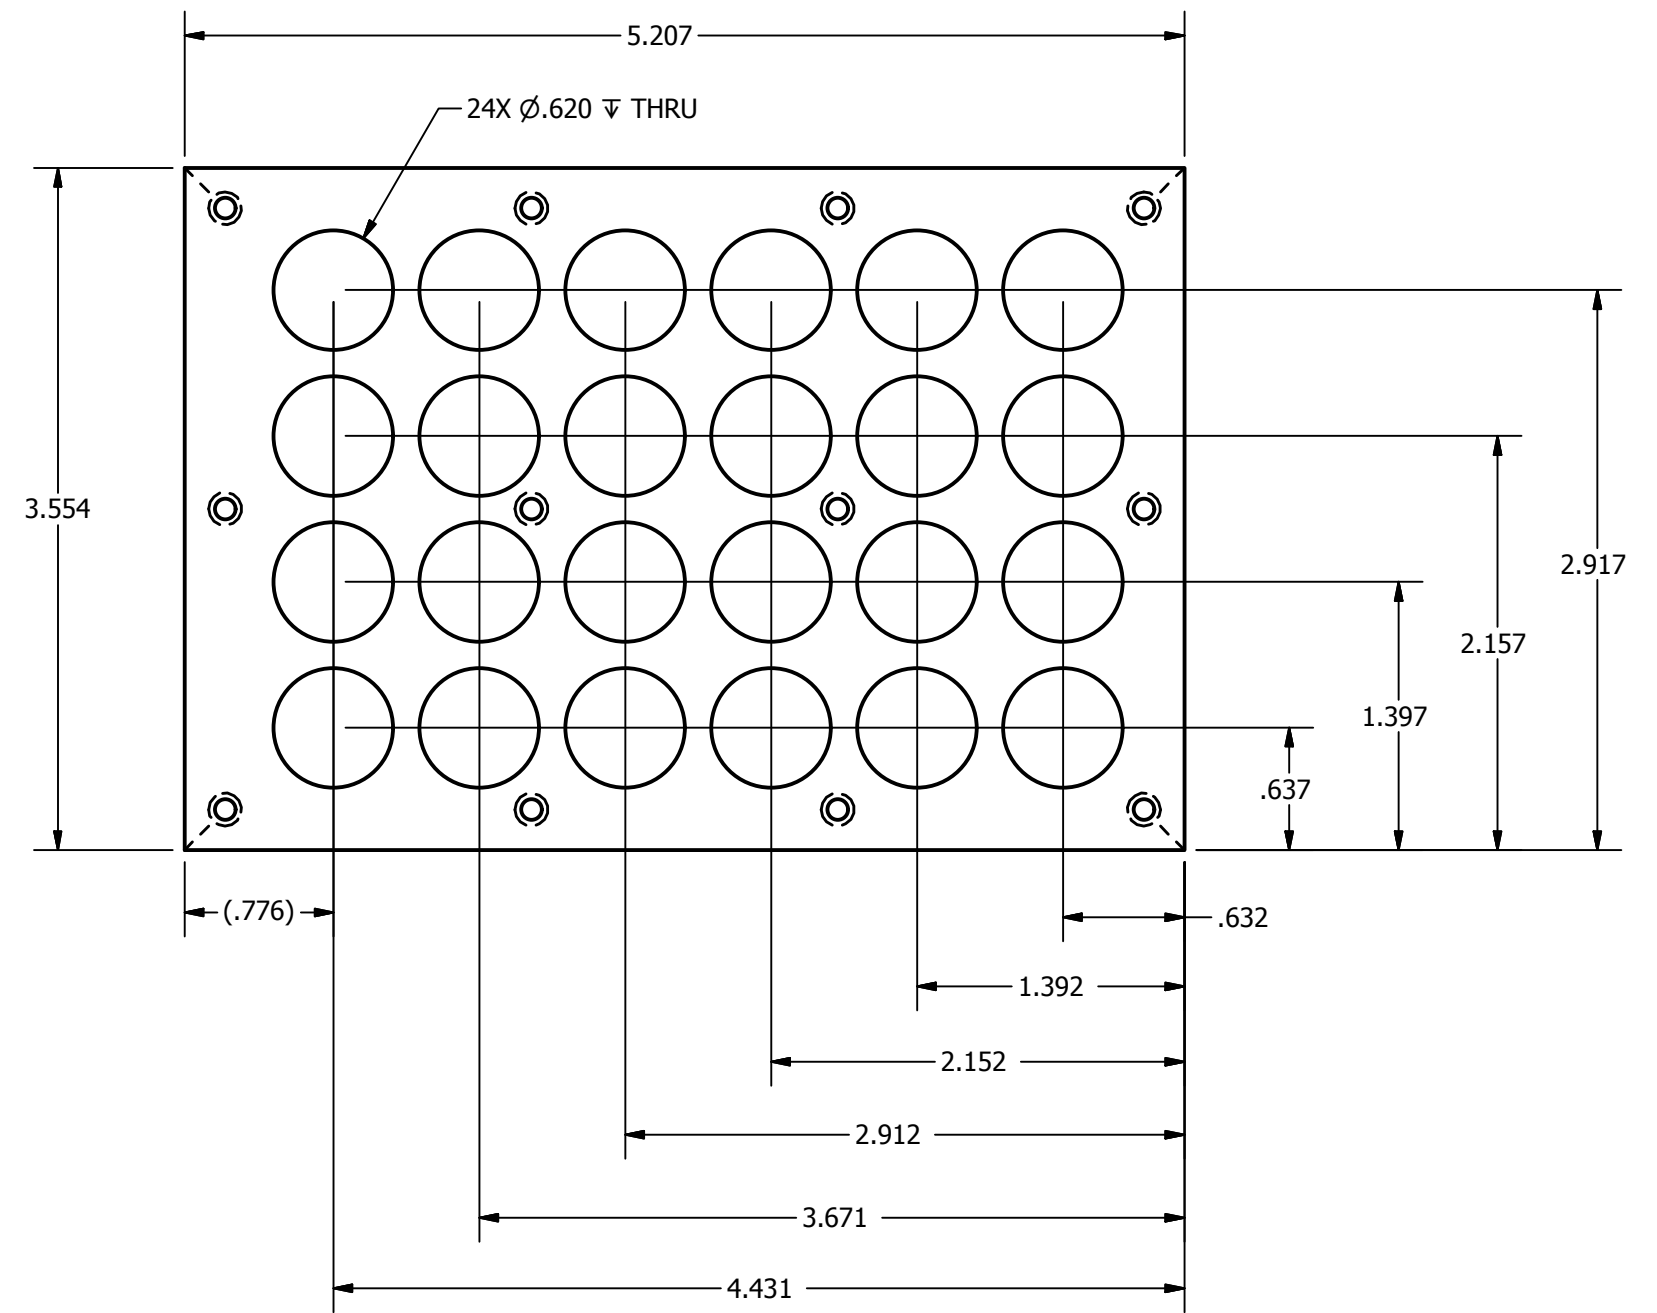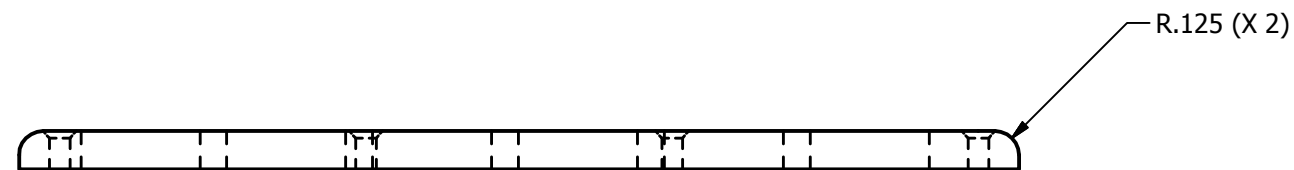

NOTICE:  
INFORMATION CONTAINED IN THIS DOCUMENT OR ANY REPRODUCTION THEREOF, IS PROPRIETARY INFORMATION AND PROPERTY OF HOWARD HUGHES MEDICAL INSTITUTE. IT SHALL NOT BE DISCLOSED, COPIED, DUPLICATED OR USED FOR MANUFACTURE, PRODUCTION OR PROCUREMENT, WITHOUT THE EXPRESS WRITTEN PERMISSION OF HOWARD HUGHES MEDICAL INSTITUTE.

(UNLESS SPECIFIED OTHERWISE)  
PRIMARY UNITS: INCHES  
[SECONDARY UNITS]: MILLIMETERS

PRIMARY TOLERANCES:  
X.X ± 0.020  
X.XX ± 0.010  
X.XXX ± 0.005  
X.XXXX ± 0.0005  
ANGULAR ± 0.5 DEG

- DO NOT SCALE DRAWING -  
THIRD ANGLE PROJECTION:

**HHMI**  
HOWARD HUGHES MEDICAL INSTITUTE

HHMI  
janelia farm  
research campus

**24 CHAMBER SCREEN HOLDER.ipt**

|           |                                         |     |                 |
|-----------|-----------------------------------------|-----|-----------------|
| SIZE<br>C | PART NUMBER<br><b>24 CHAMBER SCREEN</b> | REV | SHEET<br>1 OF 1 |
|-----------|-----------------------------------------|-----|-----------------|

HOLDER 1

4

3

2

1

GENERAL NOTES:

- 1. MATERIAL: VERO, WHITE
- 2. SPECIAL FINISH:
- 3. SURFACE ROUGHNESS (UNLESS SPECIFIED OTHERWISE):
- 4. INTERPRET DIMENSIONS AND TOLERANCES PER ASME Y14.5M-1994
- 5. DEBURR AND BREAK ALL SHARP EDGES, MAX 0.010" (UNLESS SPECIFIED OTHERWISE)
- 6. PARTS ARE TO BE CLEAN AND FREE OF OIL, GREASE, AND OTHER CONTAMINANTS
- 7. DIMENSIONS INCLUDE CHEMICALLY APPLIED FINISHES IF APPLICABLE

| ZONE |  | REV | REVISION HISTORY<br>DESCRIPTION | DATE | APPROVED |
|------|--|-----|---------------------------------|------|----------|
|      |  |     |                                 |      |          |

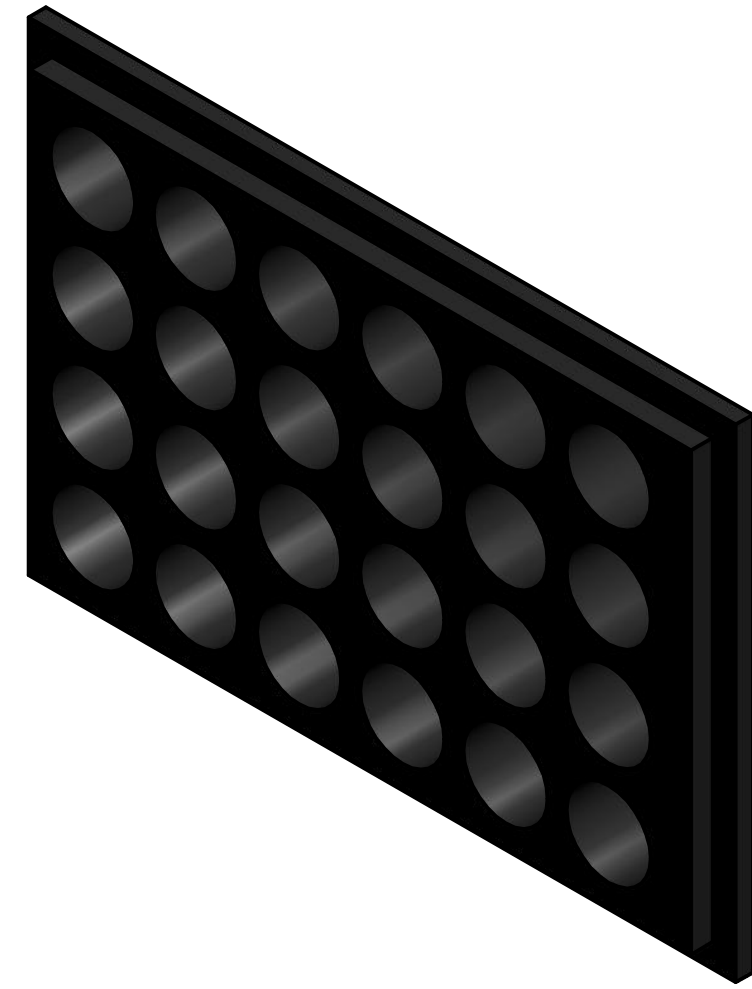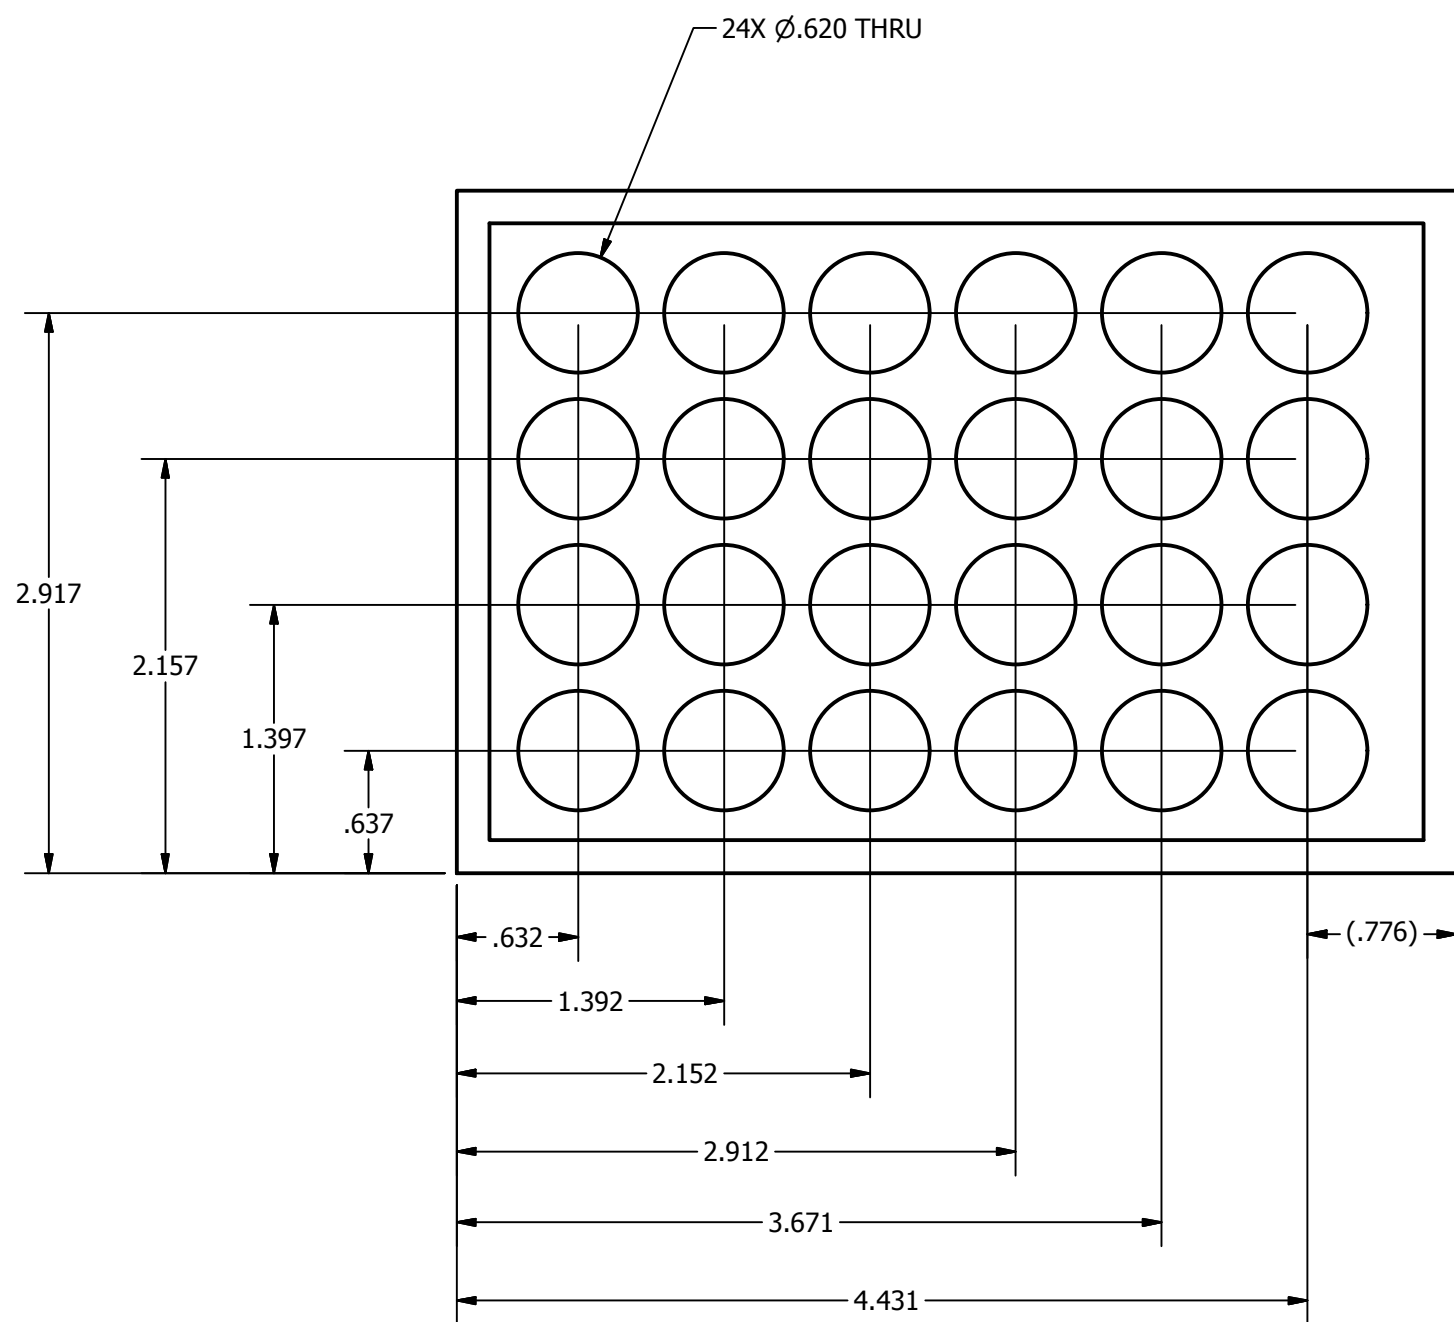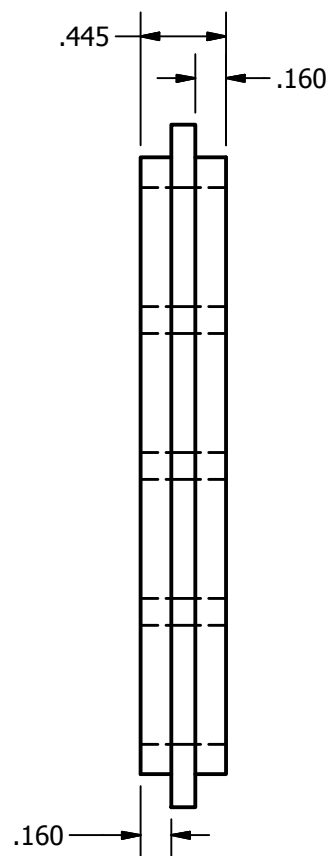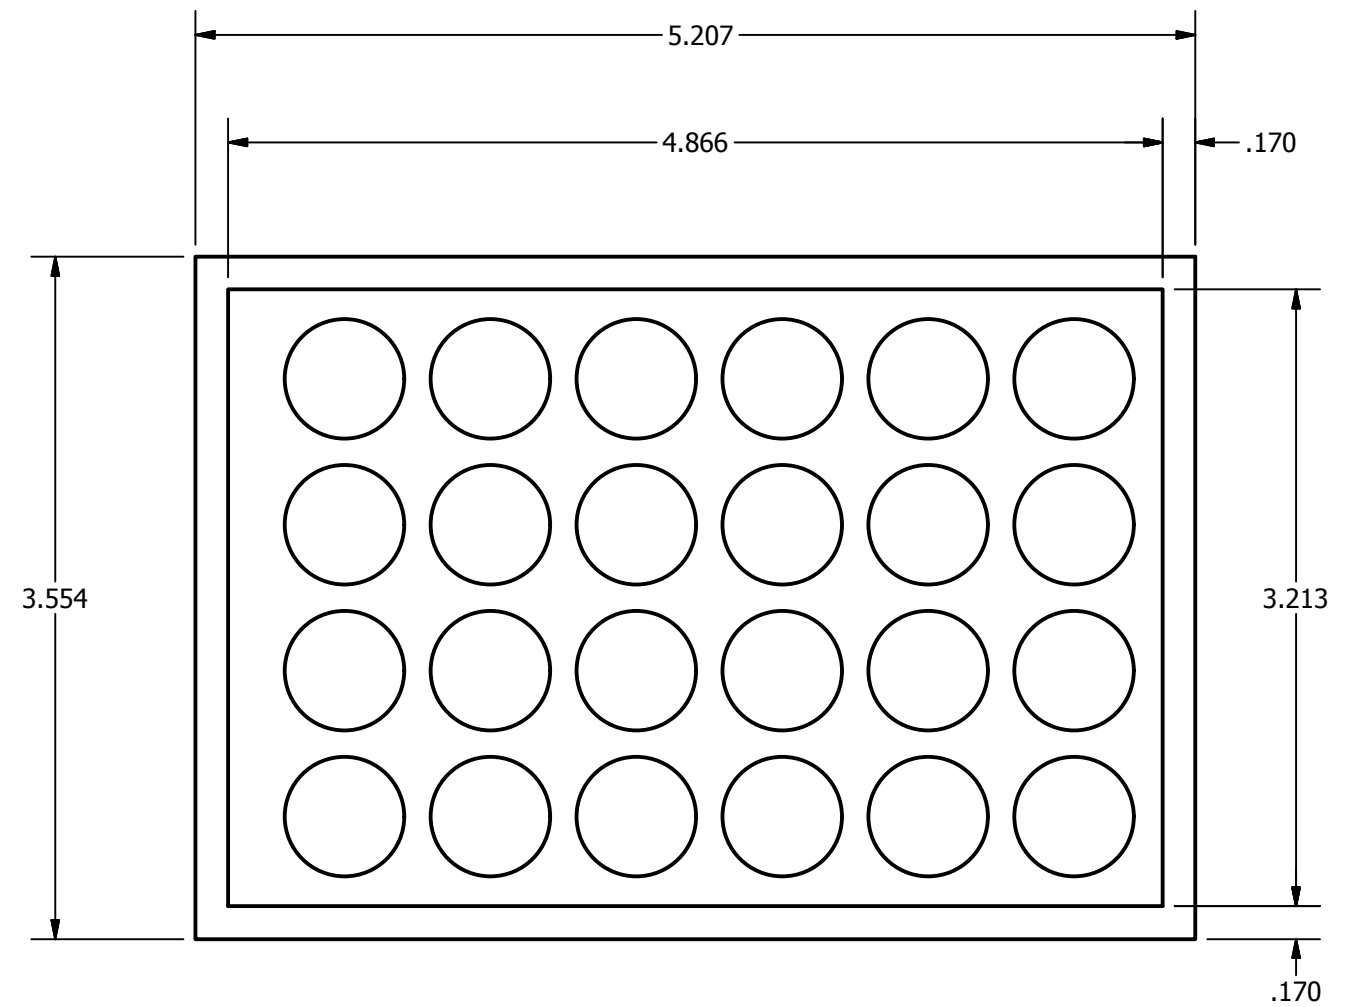

NOTICE:  
 INFORMATION CONTAINED IN THIS DOCUMENT OR ANY REPRODUCTION THEREOF, IS PROPRIETARY INFORMATION AND PROPERTY OF HOWARD HUGHES MEDICAL INSTITUTE. IT SHALL NOT BE DISCLOSED, COPIED, DUPLICATED OR USED FOR MANUFACTURE, PRODUCTION OR PROCUREMENT, WITHOUT THE EXPRESS WRITTEN PERMISSION OF HOWARD HUGHES MEDICAL INSTITUTE.

(UNLESS SPECIFIED OTHERWISE)  
 PRIMARY UNITS: INCHES  
 [SECONDARY UNITS]: MILLIMETERS

PRIMARY TOLERANCES:  
 X.X ± 0.020  
 X.XX ± 0.010  
 X.XXX ± 0.005  
 X.XXXX ± 0.0005  
 ANGULAR ± 0.5 DEG

- DO NOT SCALE DRAWING -  
 THIRD ANGLE PROJECTION:

|                                     |                                          |     |                 |
|-------------------------------------|------------------------------------------|-----|-----------------|
| <br>HOWARD HUGHES MEDICAL INSTITUTE |                                          |     |                 |
| <b>24 CHAMBER ADAPTER.ipt</b>       |                                          |     |                 |
| SIZE<br>C                           | PART NUMBER<br><b>24 CHAMBER ADAPTER</b> | REV | SHEET<br>1 OF 1 |

4

3

2

1

GENERAL NOTES:

- 1. MATERIAL: (SEE PARTS LIST)
- 2. SPECIAL FINISH:
- 3. SURFACE ROUGHNESS (UNLESS SPECIFIED OTHERWISE):
- 4. INTERPRET DIMENSIONS AND TOLERANCES PER ASME Y14.5M-1994
- 5. DEBURR AND BREAK ALL SHARP EDGES, MAX 0.010" (UNLESS SPECIFIED OTHERWISE)
- 6. PARTS ARE TO BE CLEAN AND FREE OF OIL, GREASE, AND OTHER CONTAMINANTS
- 7. DIMENSIONS INCLUDE CHEMICALLY APPLIED FINISHES IF APPLICABLE

| ZONE |  | REV | REVISION HISTORY DESCRIPTION | DATE | APPROVED |
|------|--|-----|------------------------------|------|----------|
|      |  |     |                              |      |          |

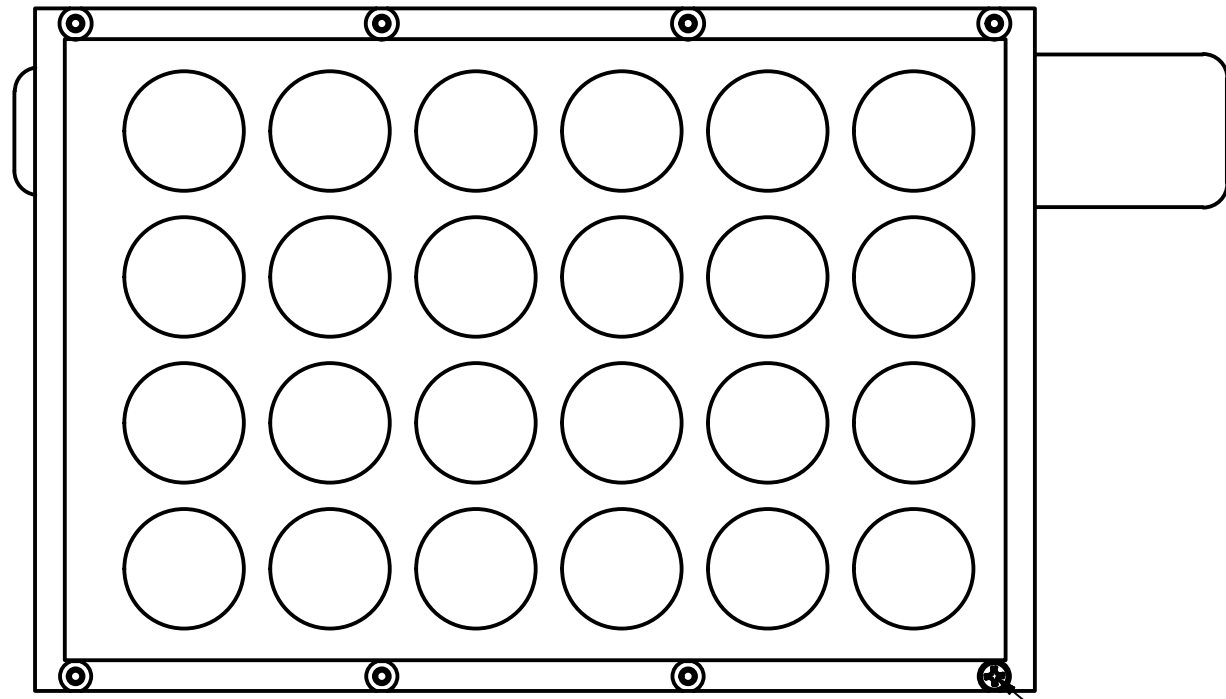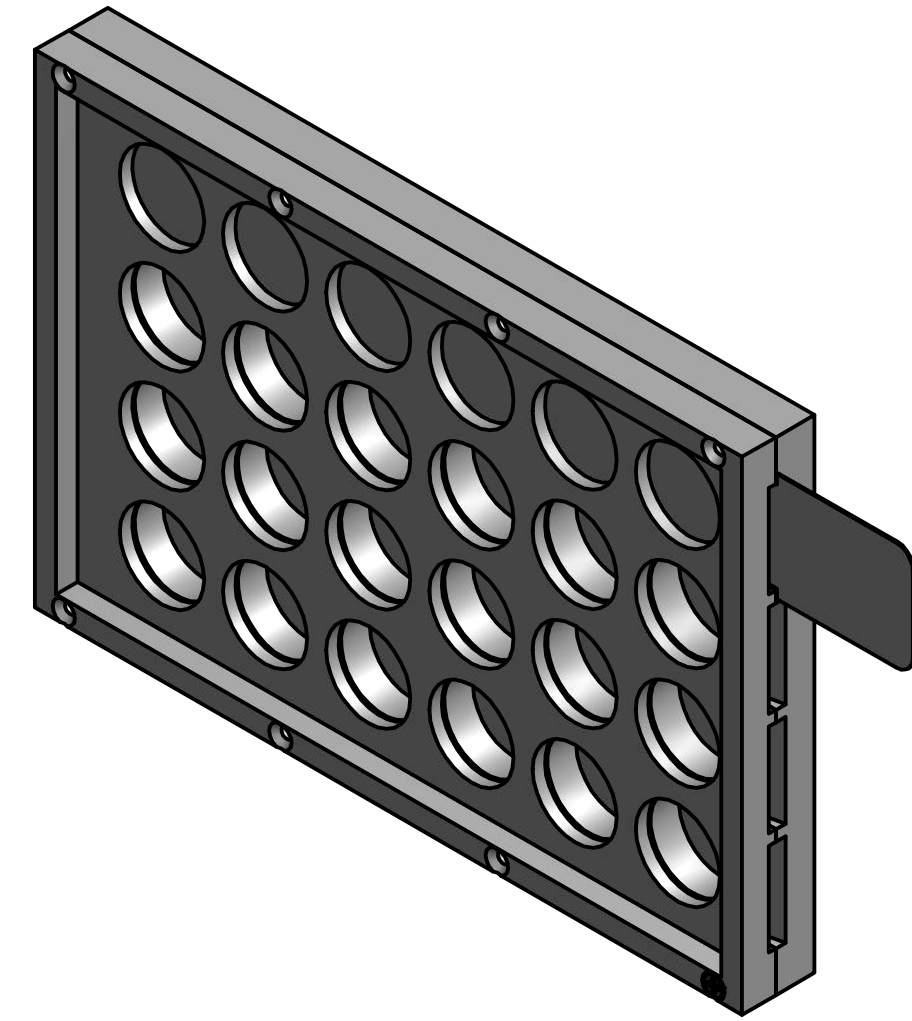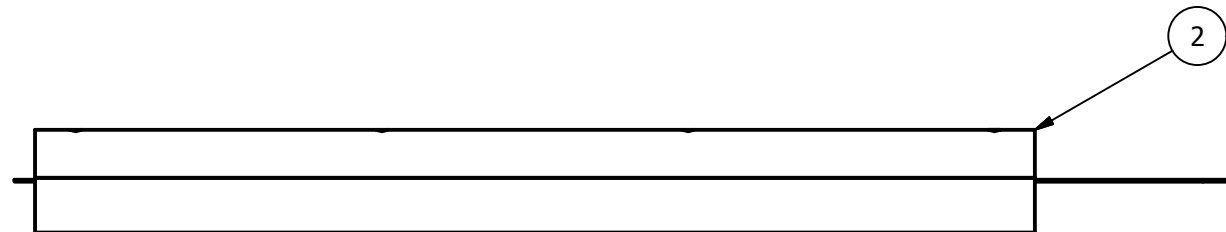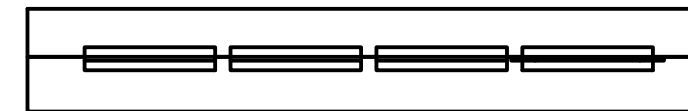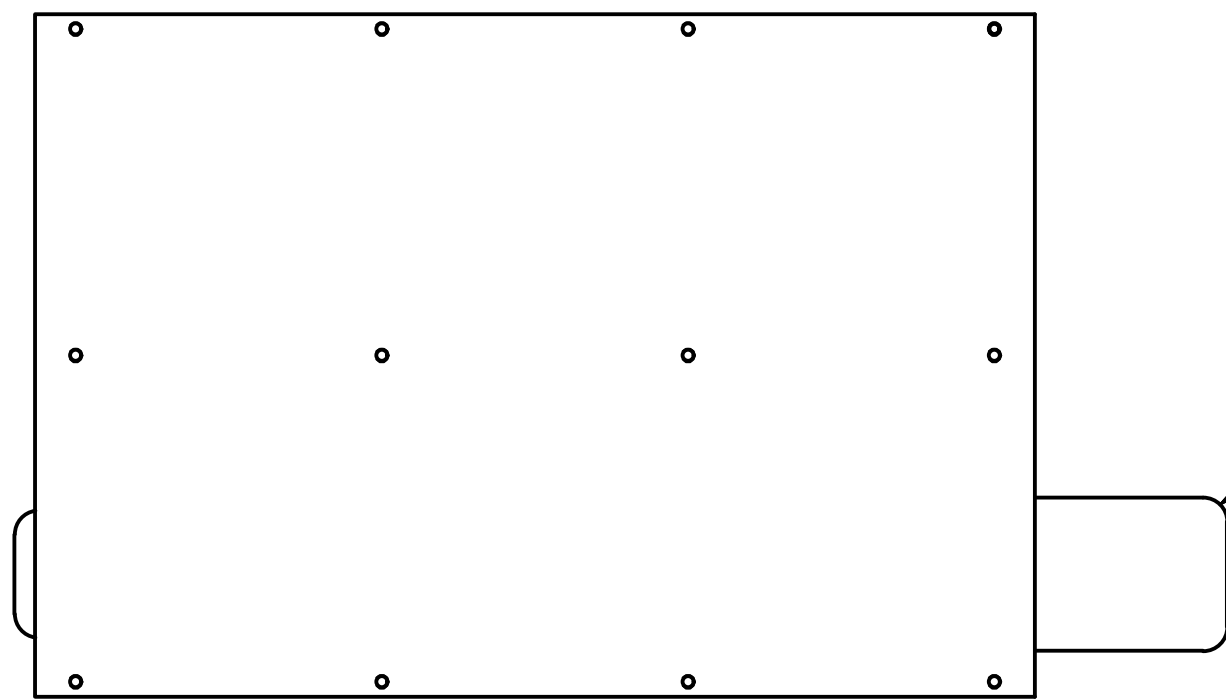

4

2

1

3

| ITEM       | QTY | FILE NAME                               | REV | PART NUMBER             | DESCRIPTION                       |
|------------|-----|-----------------------------------------|-----|-------------------------|-----------------------------------|
| 1          | 1   | 24 Chamber Baseplate.ipt                |     |                         | 24 Chamber Baseplate              |
| 2          | 1   | 24 Chamber Baseplate Cover.ipt          |     |                         | 24 Chamber Baseplate Cover        |
| 3          | 1   | 24 CHAMBER PARTITION SLIDE - SINGLE.ipt |     |                         | 24 Chamber Partition Slide-Single |
| 4          | 12  | McMaster-Carr 91771A168.ipt             |     | McMaster-Carr 91771A168 |                                   |
| PARTS LIST |     |                                         |     |                         |                                   |

NOTICE:  
 INFORMATION CONTAINED IN THIS DOCUMENT OR ANY REPRODUCTION THEREOF, IS PROPRIETARY INFORMATION AND PROPERTY OF HOWARD HUGHES MEDICAL INSTITUTE. IT SHALL NOT BE DISCLOSED, COPIED, DUPLICATED OR USED FOR MANUFACTURE, PRODUCTION OR PROCUREMENT, WITHOUT THE EXPRESS WRITTEN PERMISSION OF HOWARD HUGHES MEDICAL INSTITUTE.

(UNLESS SPECIFIED OTHERWISE)  
 PRIMARY UNITS: INCHES  
 [SECONDARY UNITS]: MILLIMETERS

PRIMARY TOLERANCES:  
 X.X ± 0.020  
 X.XX ± 0.010  
 X.XXX ± 0.005  
 X.XXXX ± 0.0005  
 ANGULAR ± 0.5 DEG

- DO NOT SCALE DRAWING -  
 THIRD ANGLE PROJECTION:

**HHMI**  
HOWARD HUGHES MEDICAL INSTITUTE

HHMI  
*janelia farm*  
research campus

**24-well aluminum chamber assembly**

|      |             |     |        |
|------|-------------|-----|--------|
| SIZE | PART NUMBER | REV | SHEET  |
| C    |             | 0   | 1 OF 1 |

4

3

2

1

GENERAL NOTES:

- 1. MATERIAL: ALUMINUM
- 2. SPECIAL FINISH:
- 3. SURFACE ROUGHNESS (UNLESS SPECIFIED OTHERWISE):
- 4. INTERPRET DIMENSIONS AND TOLERANCES PER ASME Y14.5M-1994
- 5. DEBURR AND BREAK ALL SHARP EDGES, MAX 0.010" (UNLESS SPECIFIED OTHERWISE)
- 6. PARTS ARE TO BE CLEAN AND FREE OF OIL, GREASE, AND OTHER CONTAMINANTS
- 7. DIMENSIONS INCLUDE CHEMICALLY APPLIED FINISHES IF APPLICABLE

| ZONE |  | REV | REVISION HISTORY DESCRIPTION | DATE | APPROVED |
|------|--|-----|------------------------------|------|----------|
|      |  |     |                              |      |          |

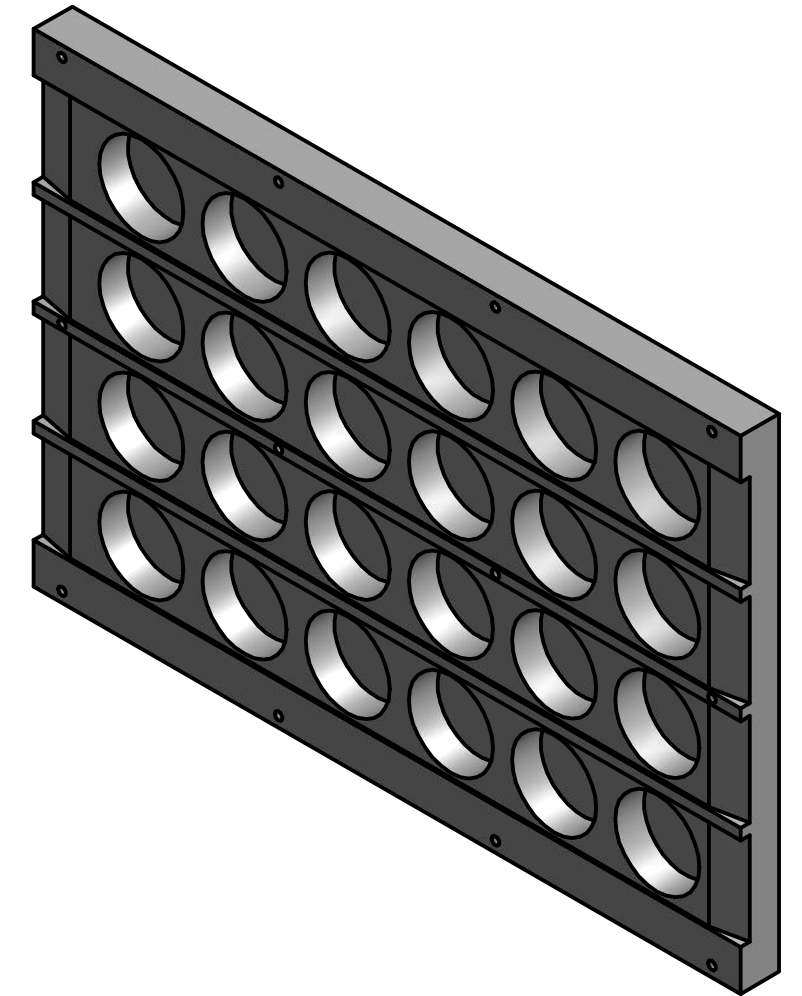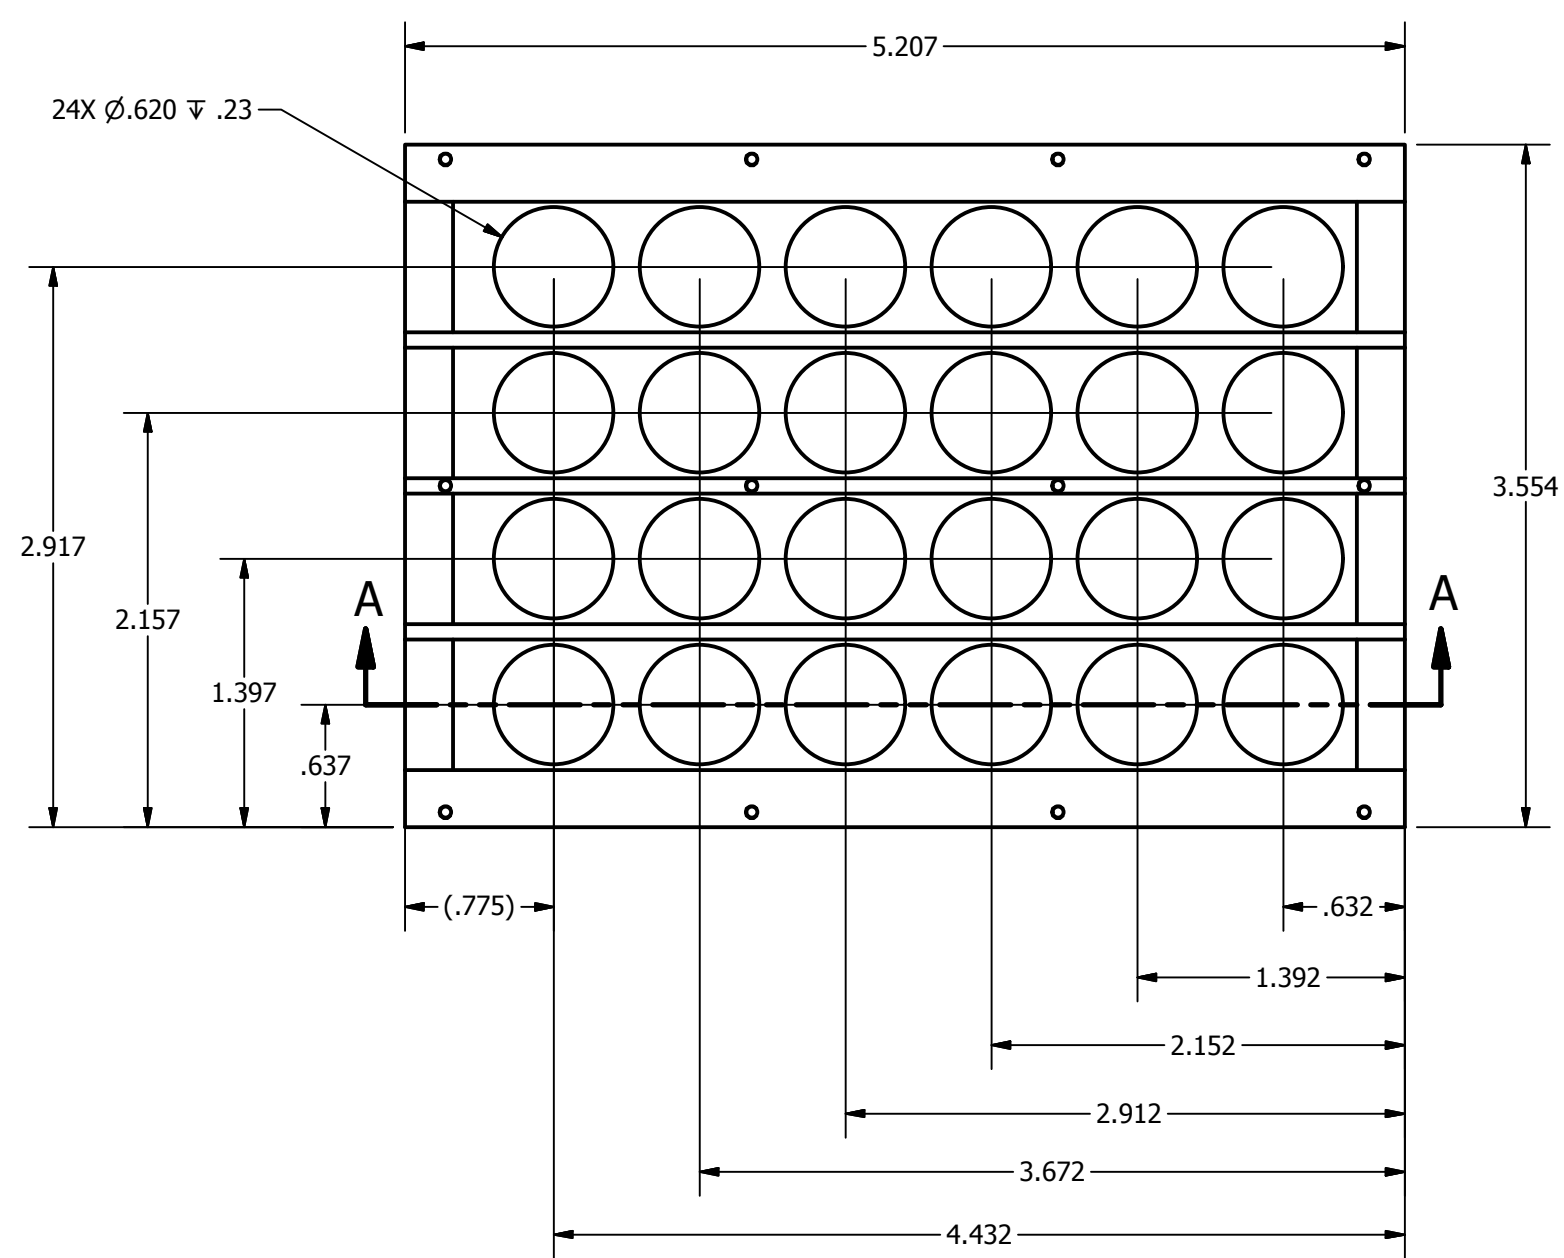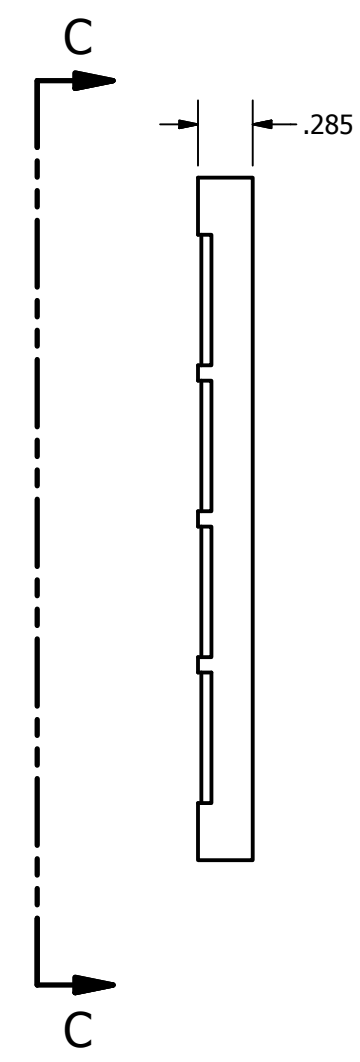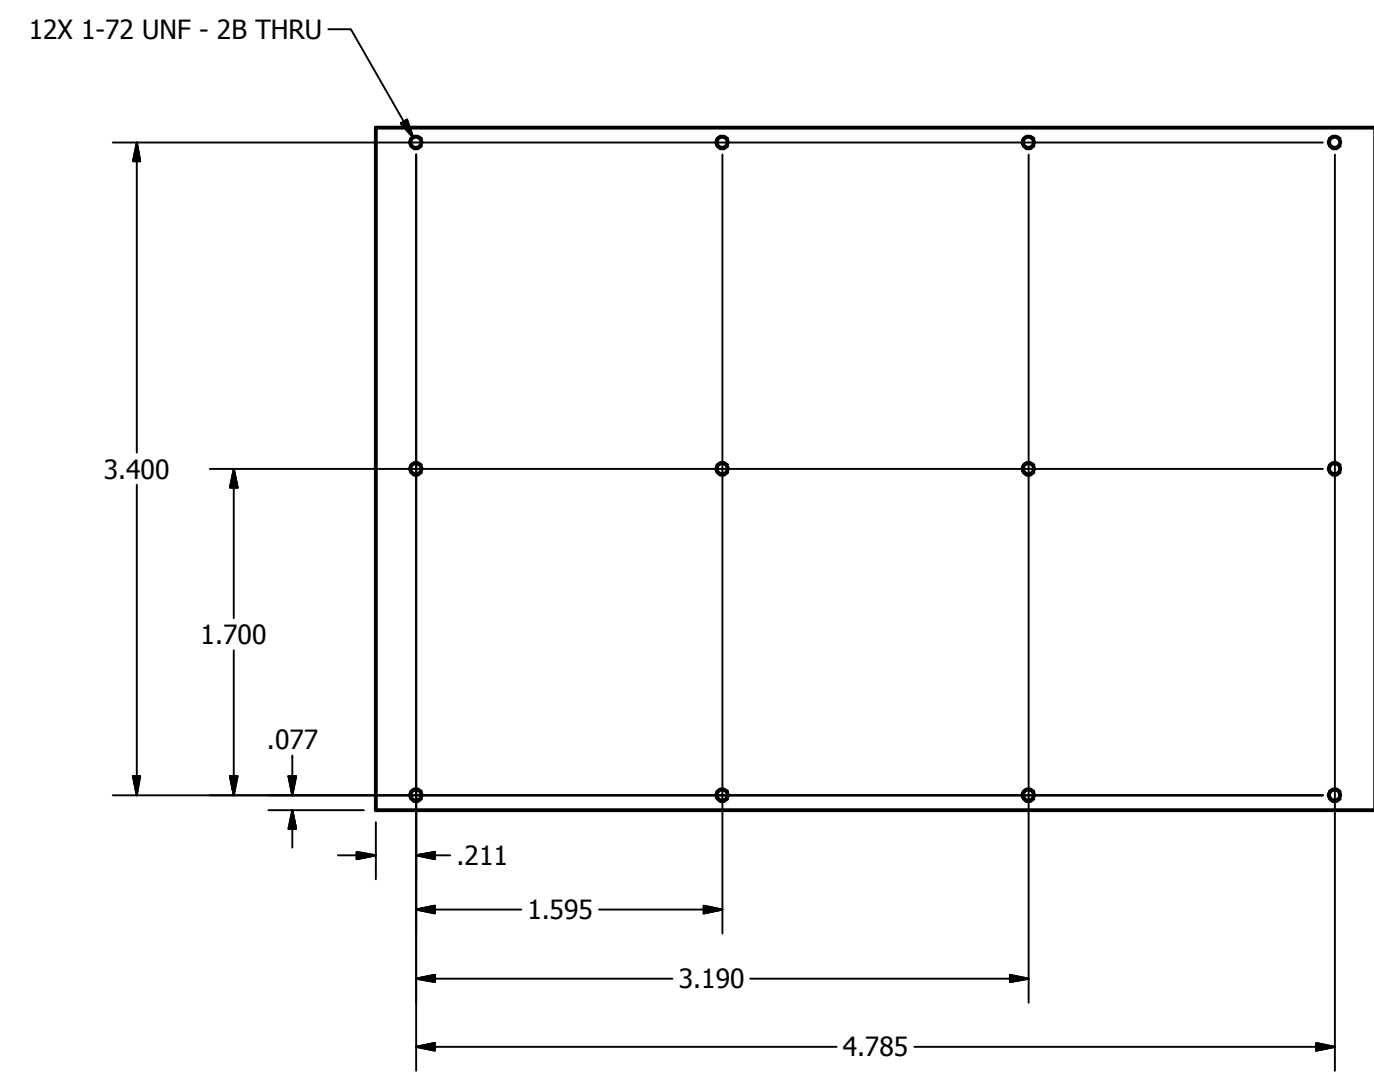

NOTICE:  
 INFORMATION CONTAINED IN THIS DOCUMENT OR ANY REPRODUCTION THEREOF, IS PROPRIETARY INFORMATION AND PROPERTY OF HOWARD HUGHES MEDICAL INSTITUTE. IT SHALL NOT BE DISCLOSED, COPIED, DUPLICATED OR USED FOR MANUFACTURE, PRODUCTION OR PROCUREMENT, WITHOUT THE EXPRESS WRITTEN PERMISSION OF HOWARD HUGHES MEDICAL INSTITUTE.

(UNLESS SPECIFIED OTHERWISE)  
 PRIMARY UNITS: INCHES  
 [SECONDARY UNITS]: MILLIMETERS

PRIMARY TOLERANCES:  
 X.X ± 0.020  
 X.XX ± 0.010  
 X.XXX ± 0.005  
 X.XXXX ± 0.0005  
 ANGULAR ± 0.5 DEG

- DO NOT SCALE DRAWING -  
 THIRD ANGLE PROJECTION:

|                                     |             |     |        |
|-------------------------------------|-------------|-----|--------|
| <br>HOWARD HUGHES MEDICAL INSTITUTE |             |     |        |
| <h3>24 Chamber Baseplate.ipt</h3>   |             |     |        |
| SIZE                                | PART NUMBER | REV | SHEET  |
| C                                   | 1           | 0   | 1 OF 2 |

4

3

2

1

D

D

C

C

B

B

A

A

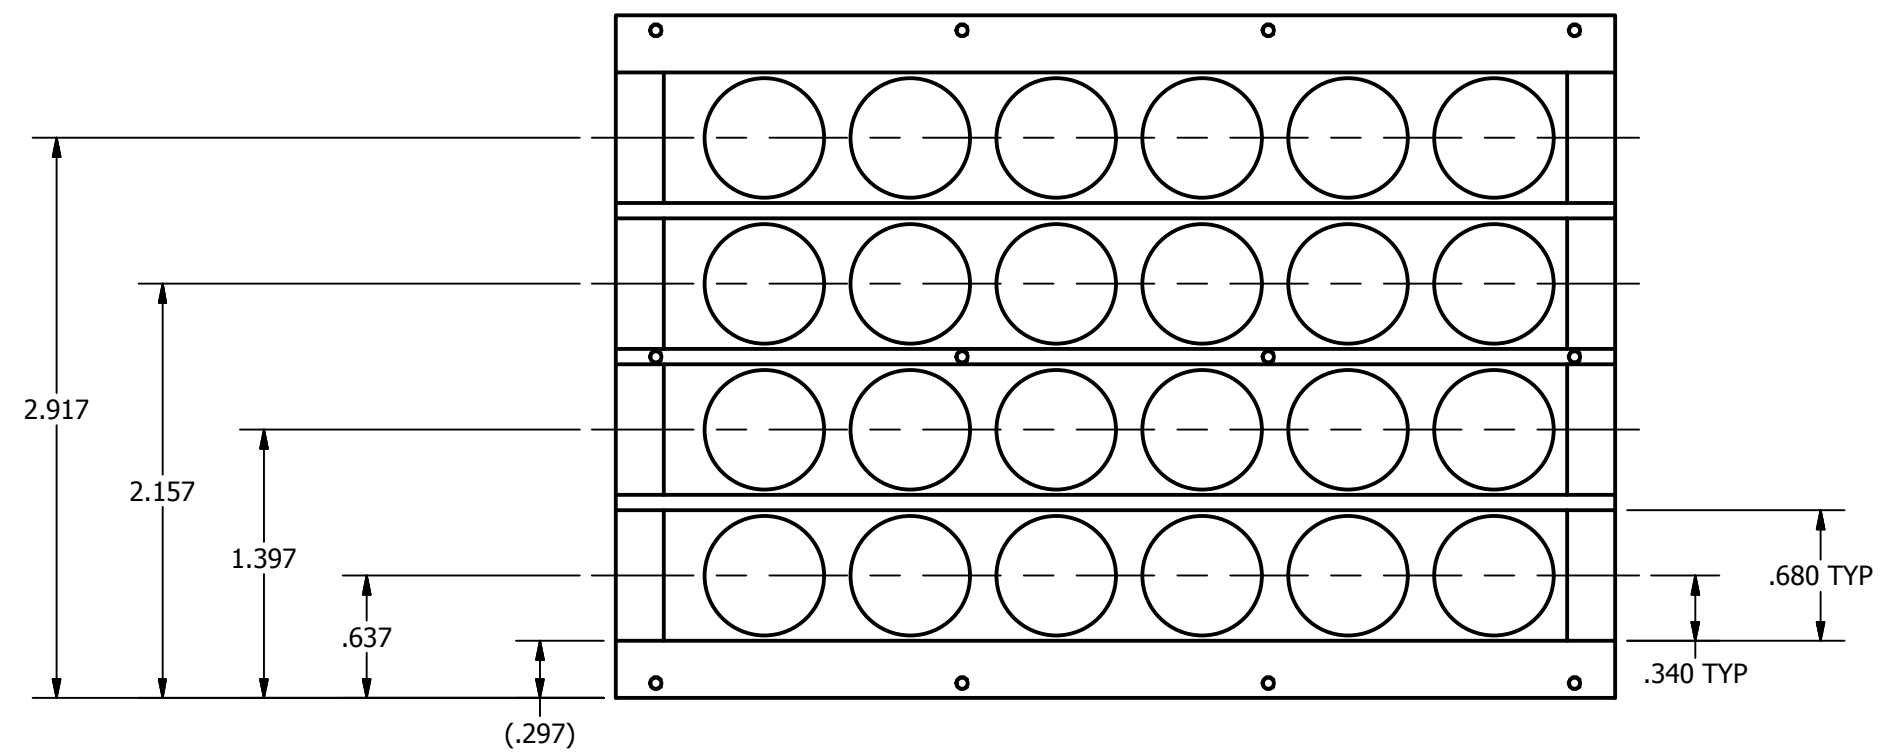

VIEW C-C

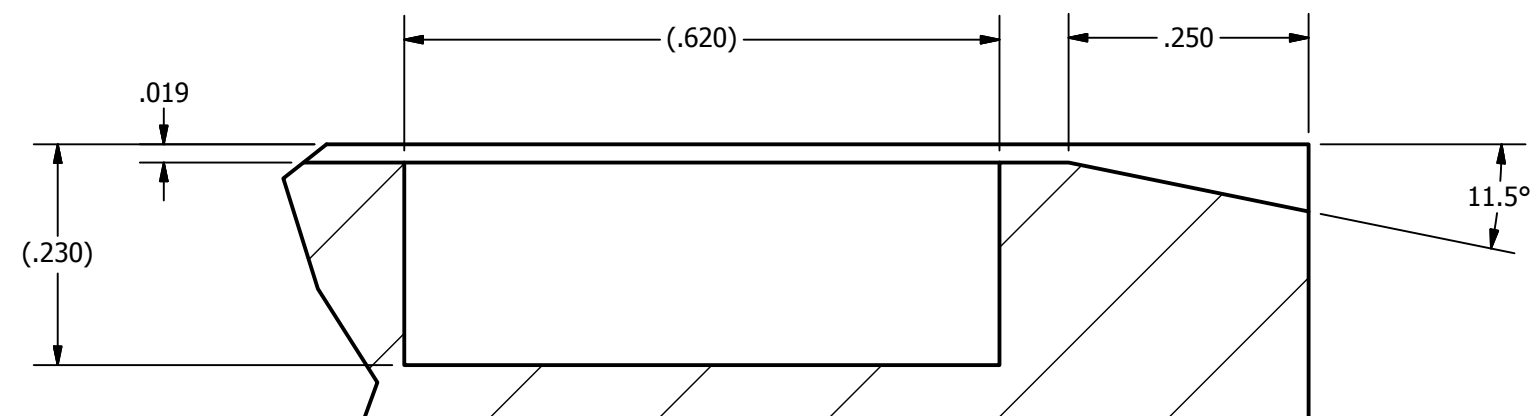

DETAIL B  
TYP FOR 4 SLOTS  
SCALE 5:1

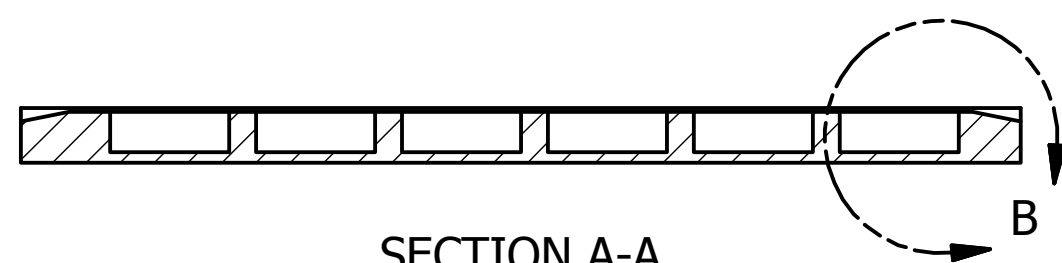

SECTION A-A

NOTICE:  
INFORMATION CONTAINED IN THIS DOCUMENT OR ANY REPRODUCTION THEREOF, IS PROPRIETARY INFORMATION AND PROPERTY OF HOWARD HUGHES MEDICAL INSTITUTE. IT SHALL NOT BE DISCLOSED, COPIED, DUPLICATED OR USED FOR MANUFACTURE, PRODUCTION OR PROCUREMENT, WITHOUT THE EXPRESS WRITTEN PERMISSION OF HOWARD HUGHES MEDICAL INSTITUTE.

(UNLESS SPECIFIED OTHERWISE)  
PRIMARY UNITS: INCHES  
[SECONDARY UNITS]: MILLIMETERS

PRIMARY TOLERANCES:  
 X.X ± 0.020  
 X.XX ± 0.010  
 X.XXX ± 0.005  
 X.XXXX ± 0.0005  
 ANGULAR ± 0.5 DEG

- DO NOT SCALE DRAWING -  
THIRD ANGLE PROJECTION:

|                                     |             |     |        |
|-------------------------------------|-------------|-----|--------|
| <br>HOWARD HUGHES MEDICAL INSTITUTE |             |     |        |
| <h3>24 Chamber Baseplate.ipt</h3>   |             |     |        |
| SIZE                                | PART NUMBER | REV | SHEET  |
| C                                   |             | 0   | 2 OF 2 |

4

3

2

1

4



4

3

2

1

GENERAL NOTES:

- 1. MATERIAL: VERO CLEAR
- 2. SPECIAL FINISH:
- 3. SURFACE ROUGHNESS (UNLESS SPECIFIED OTHERWISE):
- 4. INTERPRET DIMENSIONS AND TOLERANCES PER ASME Y14.5M-1994
- 5. DEBURR AND BREAK ALL SHARP EDGES, MAX 0.010" (UNLESS SPECIFIED OTHERWISE)
- 6. PARTS ARE TO BE CLEAN AND FREE OF OIL, GREASE, AND OTHER CONTAMINANTS
- 7. DIMENSIONS INCLUDE CHEMICALLY APPLIED FINISHES IF APPLICABLE

| ZONE |  | REV | REVISION HISTORY DESCRIPTION | DATE | APPROVED |
|------|--|-----|------------------------------|------|----------|
|      |  |     |                              |      |          |

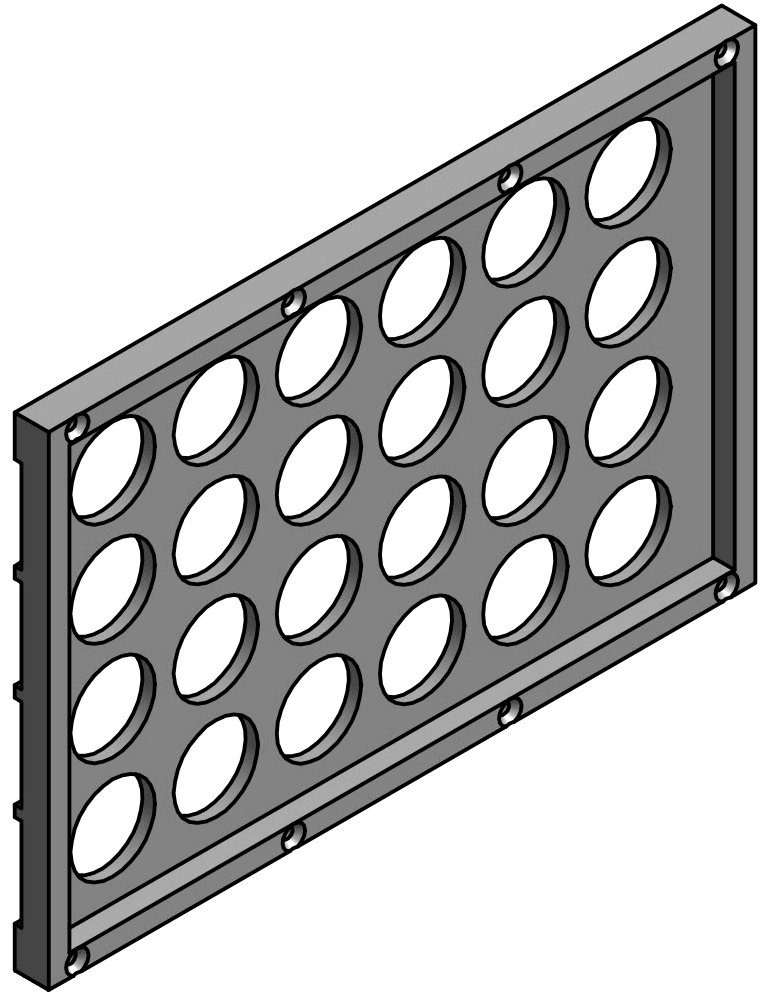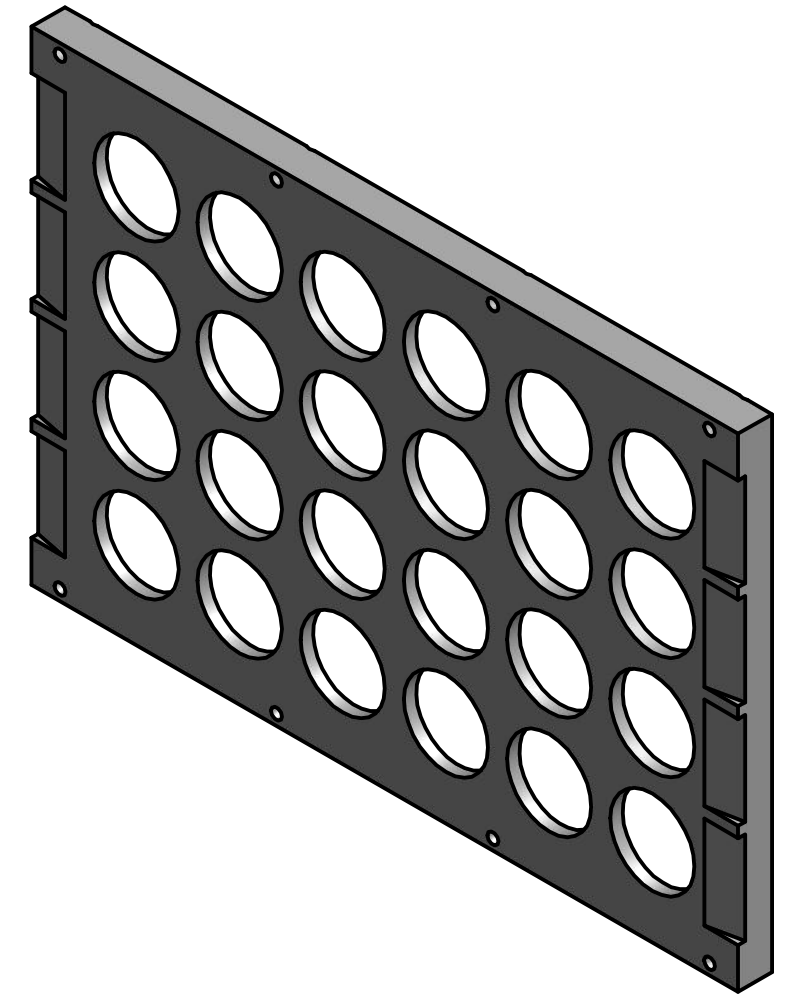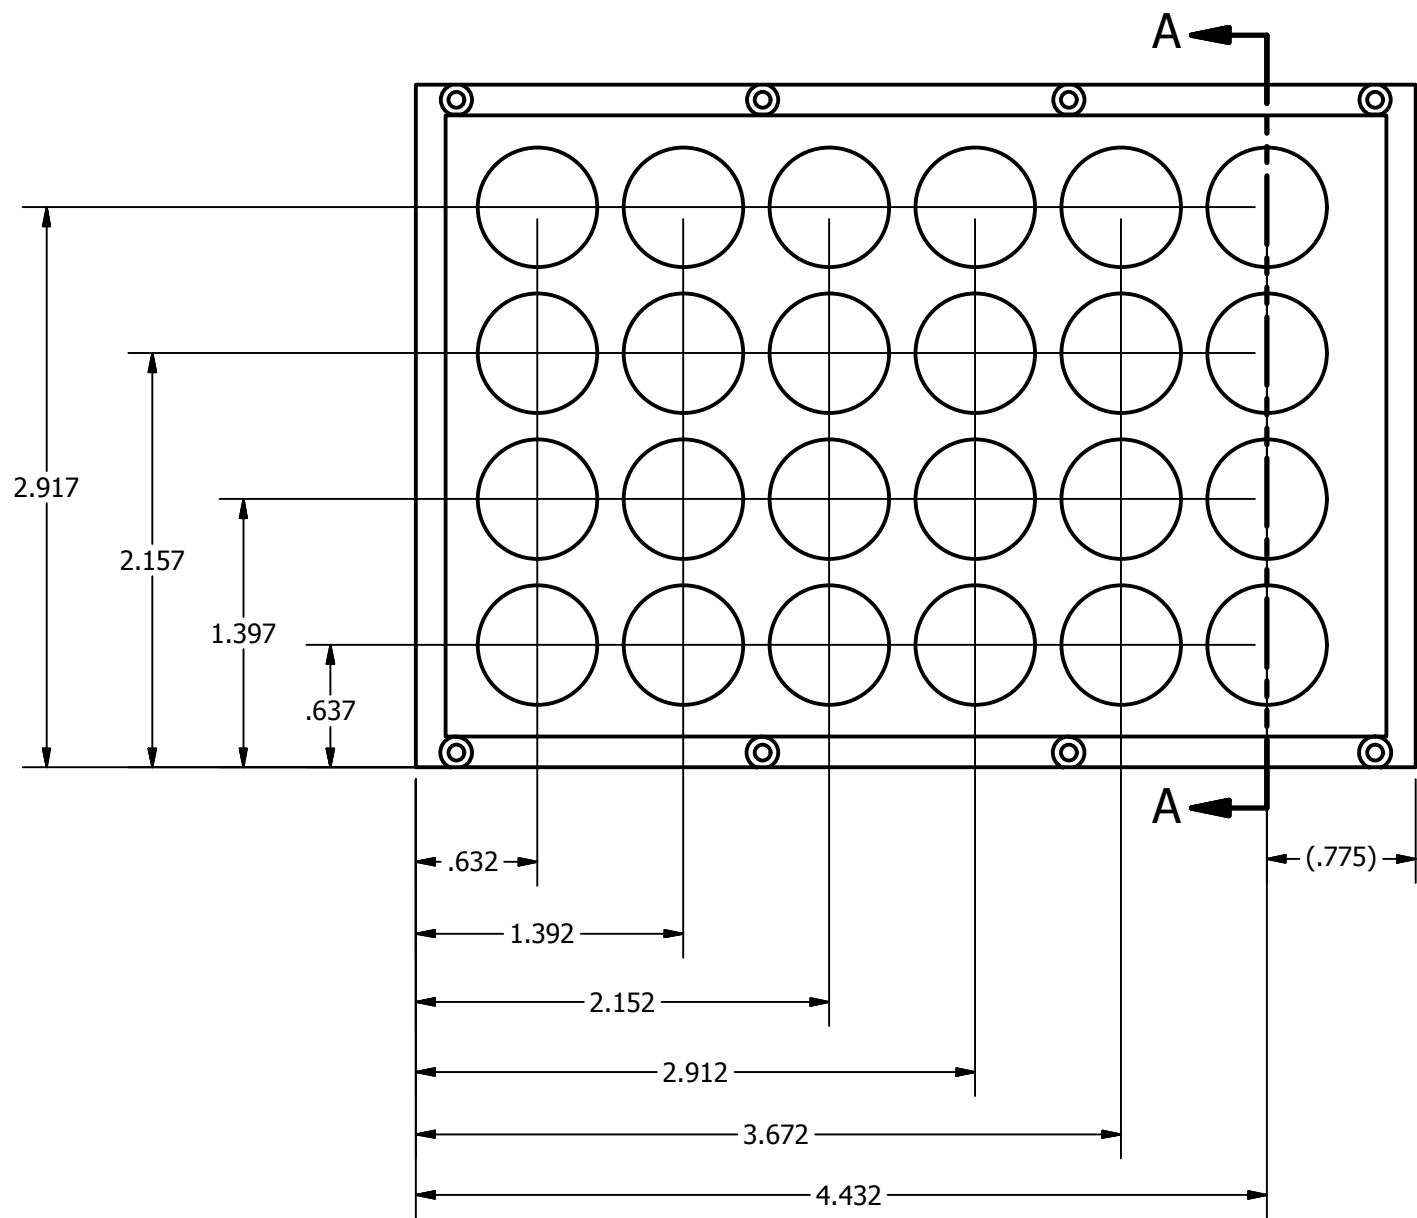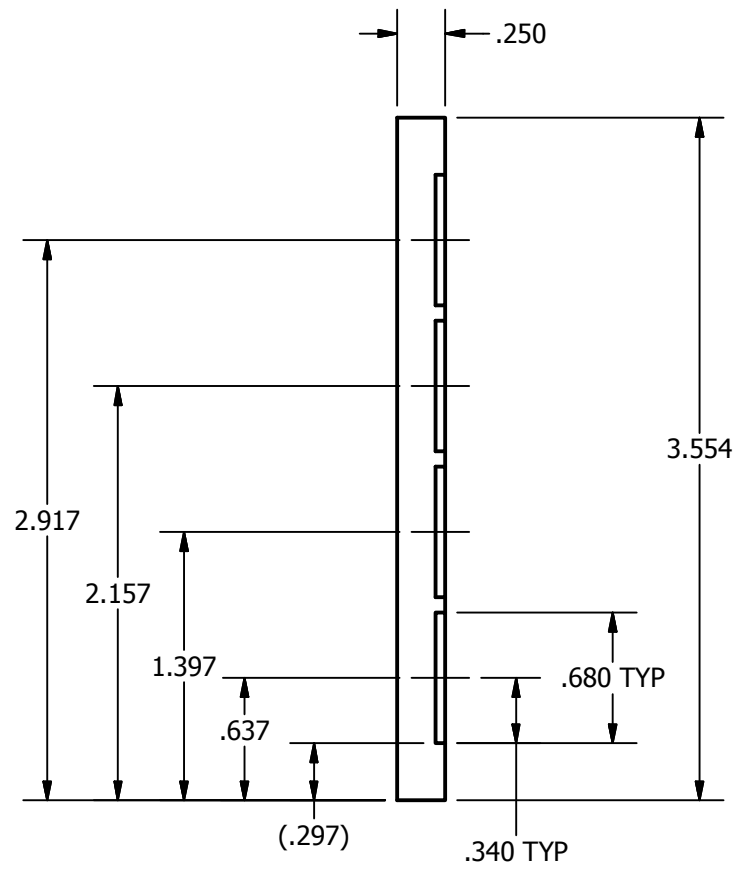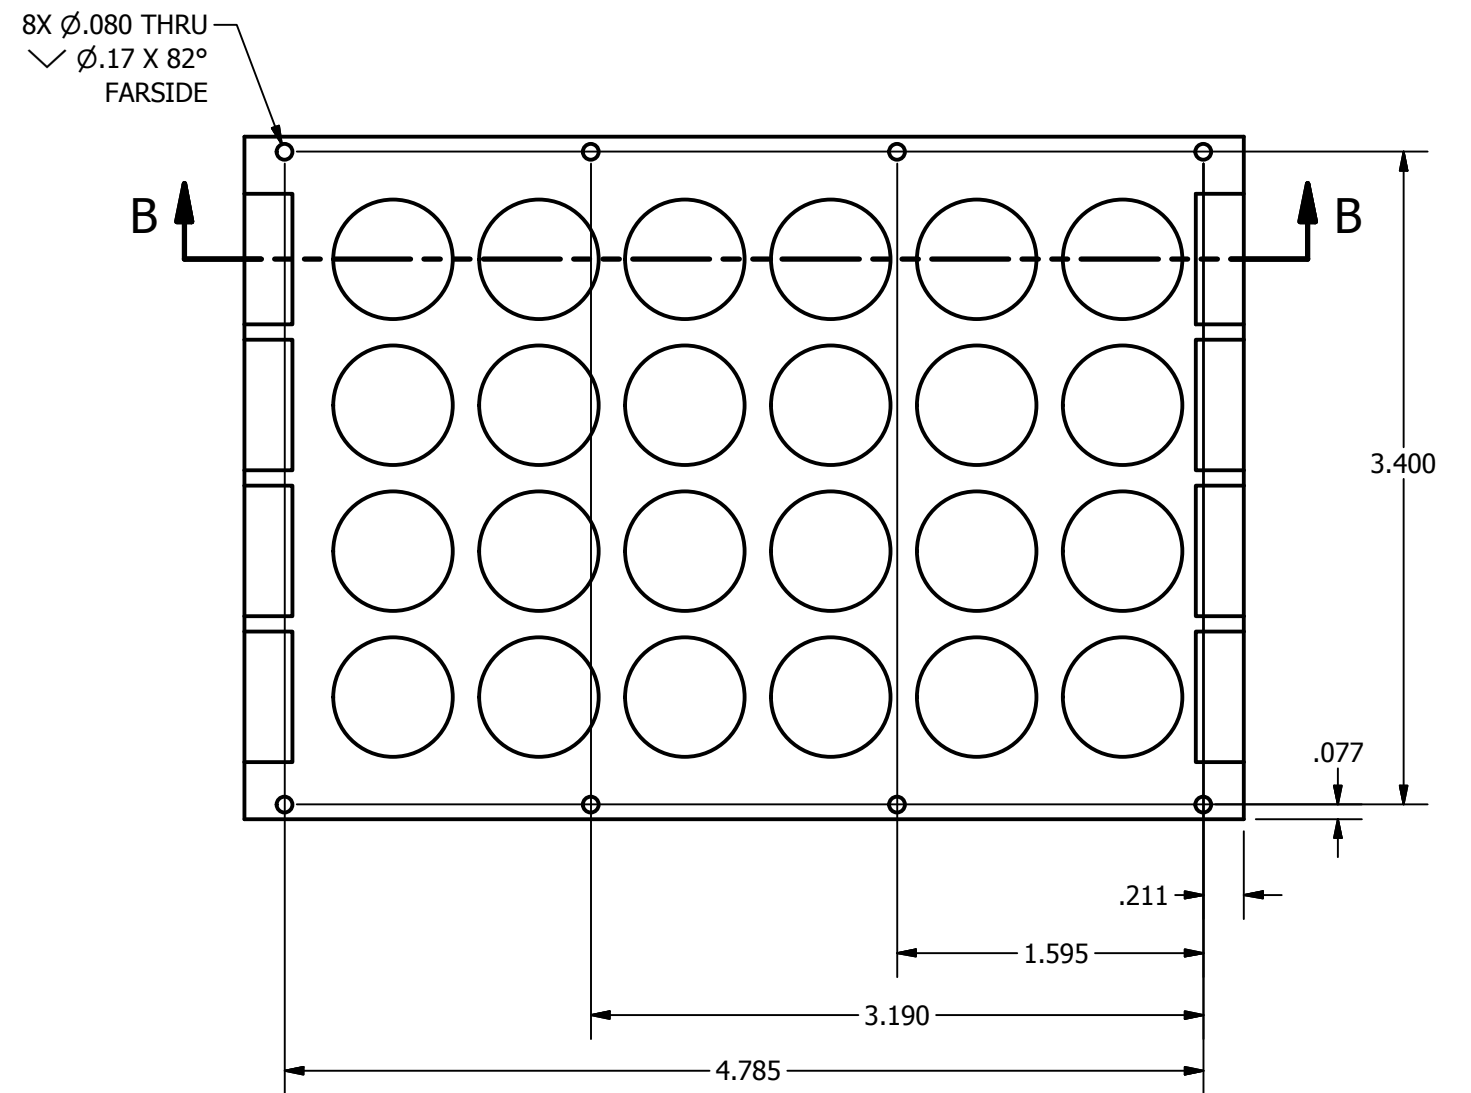

NOTICE:  
 INFORMATION CONTAINED IN THIS DOCUMENT OR ANY REPRODUCTION THEREOF, IS PROPRIETARY INFORMATION AND PROPERTY OF HOWARD HUGHES MEDICAL INSTITUTE. IT SHALL NOT BE DISCLOSED, COPIED, DUPLICATED OR USED FOR MANUFACTURE, PRODUCTION OR PROCUREMENT, WITHOUT THE EXPRESS WRITTEN PERMISSION OF HOWARD HUGHES MEDICAL INSTITUTE.

(UNLESS SPECIFIED OTHERWISE)  
 PRIMARY UNITS: INCHES  
 [SECONDARY UNITS]: MILLIMETERS

PRIMARY TOLERANCES:  
 X.X ± 0.020  
 X.XX ± 0.010  
 X.XXX ± 0.005  
 X.XXXX ± 0.0005  
 ANGULAR ± 0.5 DEG

- DO NOT SCALE DRAWING -  
 THIRD ANGLE PROJECTION:

|                                         |             |     |        |
|-----------------------------------------|-------------|-----|--------|
| <br>HOWARD HUGHES MEDICAL INSTITUTE     |             |     |        |
| <h3>24 Chamber Baseplate Cover.ipt</h3> |             |     |        |
| SIZE                                    | PART NUMBER | REV | SHEET  |
| C                                       | 1           | 0   | 1 OF 2 |

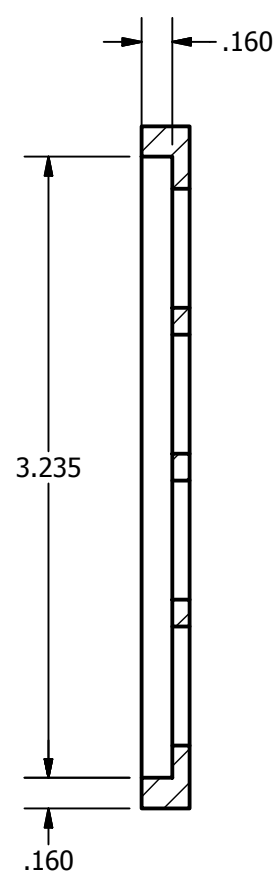

SECTION A-A

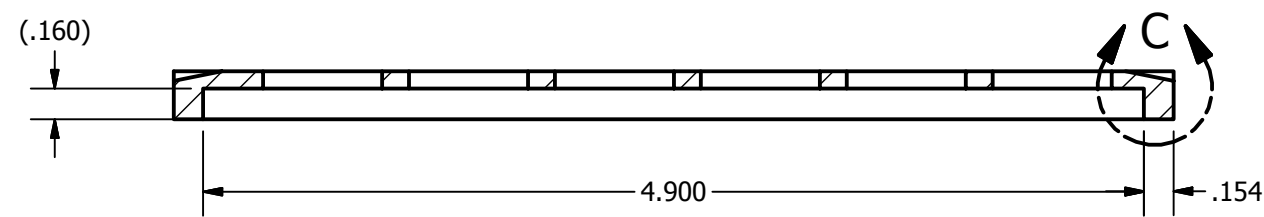

SECTION B-B

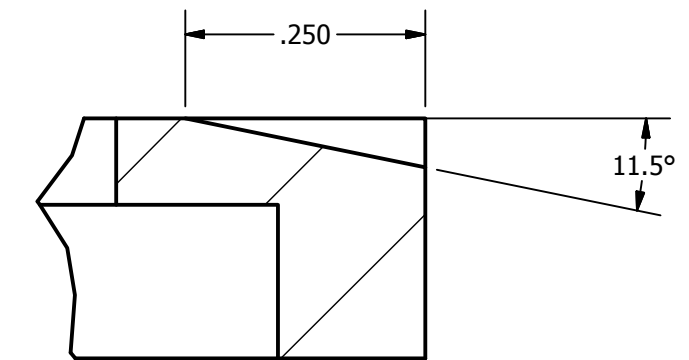

DETAIL C  
TYP 8 PLCS

NOTICE:  
INFORMATION CONTAINED IN THIS DOCUMENT OR ANY REPRODUCTION THEREOF, IS PROPRIETARY INFORMATION AND PROPERTY OF HOWARD HUGHES MEDICAL INSTITUTE. IT SHALL NOT BE DISCLOSED, COPIED, DUPLICATED OR USED FOR MANUFACTURE, PRODUCTION OR PROCUREMENT, WITHOUT THE EXPRESS WRITTEN PERMISSION OF HOWARD HUGHES MEDICAL INSTITUTE.

(UNLESS SPECIFIED OTHERWISE)  
PRIMARY UNITS: INCHES  
[SECONDARY UNITS]: MILLIMETERS

PRIMARY TOLERANCES:  
 X.X ± 0.020  
 X.XX ± 0.010  
 X.XXX ± 0.005  
 X.XXXX ± 0.0005  
 ANGULAR ± 0.5 DEG

- DO NOT SCALE DRAWING -  
THIRD ANGLE PROJECTION:

|                                       |             |     |        |
|---------------------------------------|-------------|-----|--------|
|                                       |             |     |        |
| <p>24 Chamber Baseplate Cover.ipt</p> |             |     |        |
| SIZE                                  | PART NUMBER | REV | SHEET  |
| C                                     |             | 0   | 2 OF 2 |

4

3

2

1

GENERAL NOTES:

- 1. MATERIAL: STAINLESS STEEL SHIM STOCK
- 2. SPECIAL FINISH:
- 3. SURFACE ROUGHNESS (UNLESS SPECIFIED OTHERWISE):
- 4. INTERPRET DIMENSIONS AND TOLERANCES PER ASME Y14.5M-1994
- 5. DEBURR AND BREAK ALL SHARP EDGES, MAX 0.010" (UNLESS SPECIFIED OTHERWISE)
- 6. PARTS ARE TO BE CLEAN AND FREE OF OIL, GREASE, AND OTHER CONTAMINANTS
- 7. DIMENSIONS INCLUDE CHEMICALLY APPLIED FINISHES IF APPLICABLE

| ZONE |  | REV | REVISION HISTORY<br>DESCRIPTION | DATE | APPROVED |
|------|--|-----|---------------------------------|------|----------|
|      |  |     |                                 |      |          |

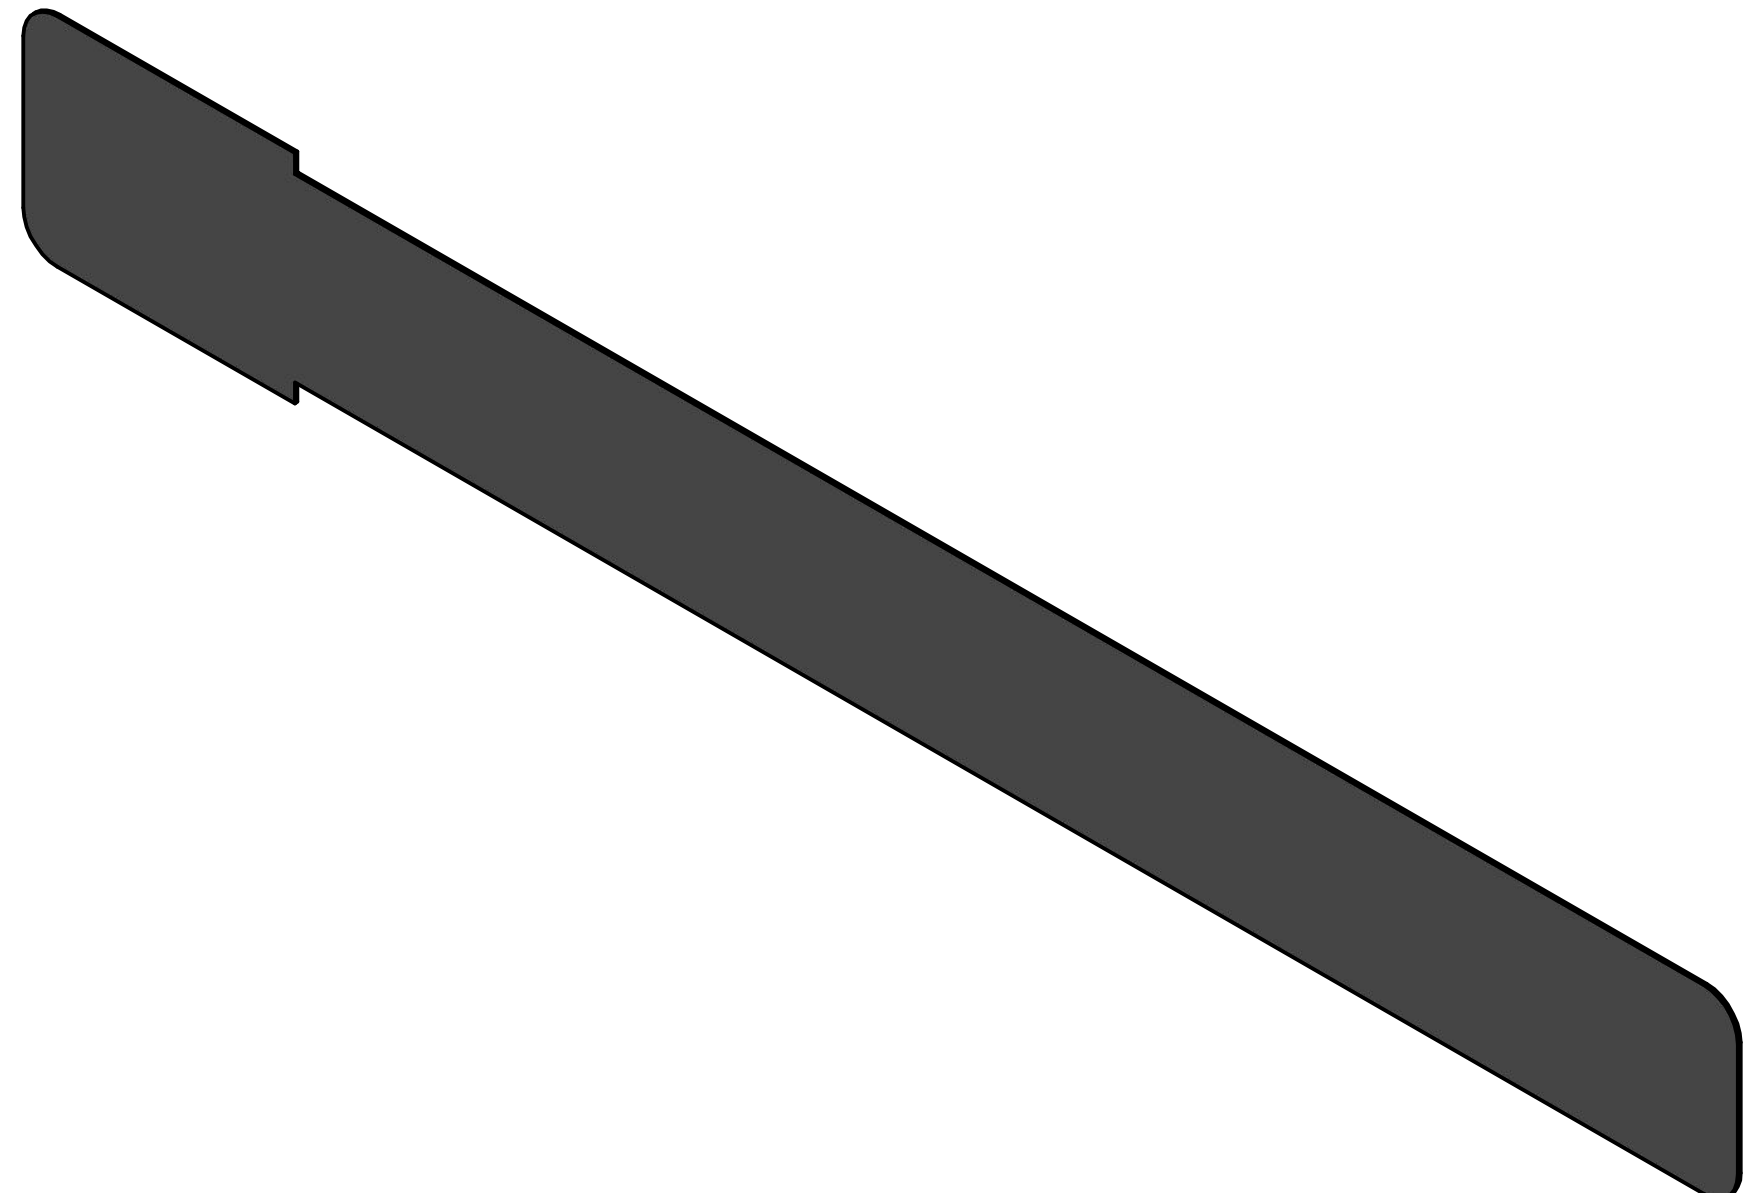

.010

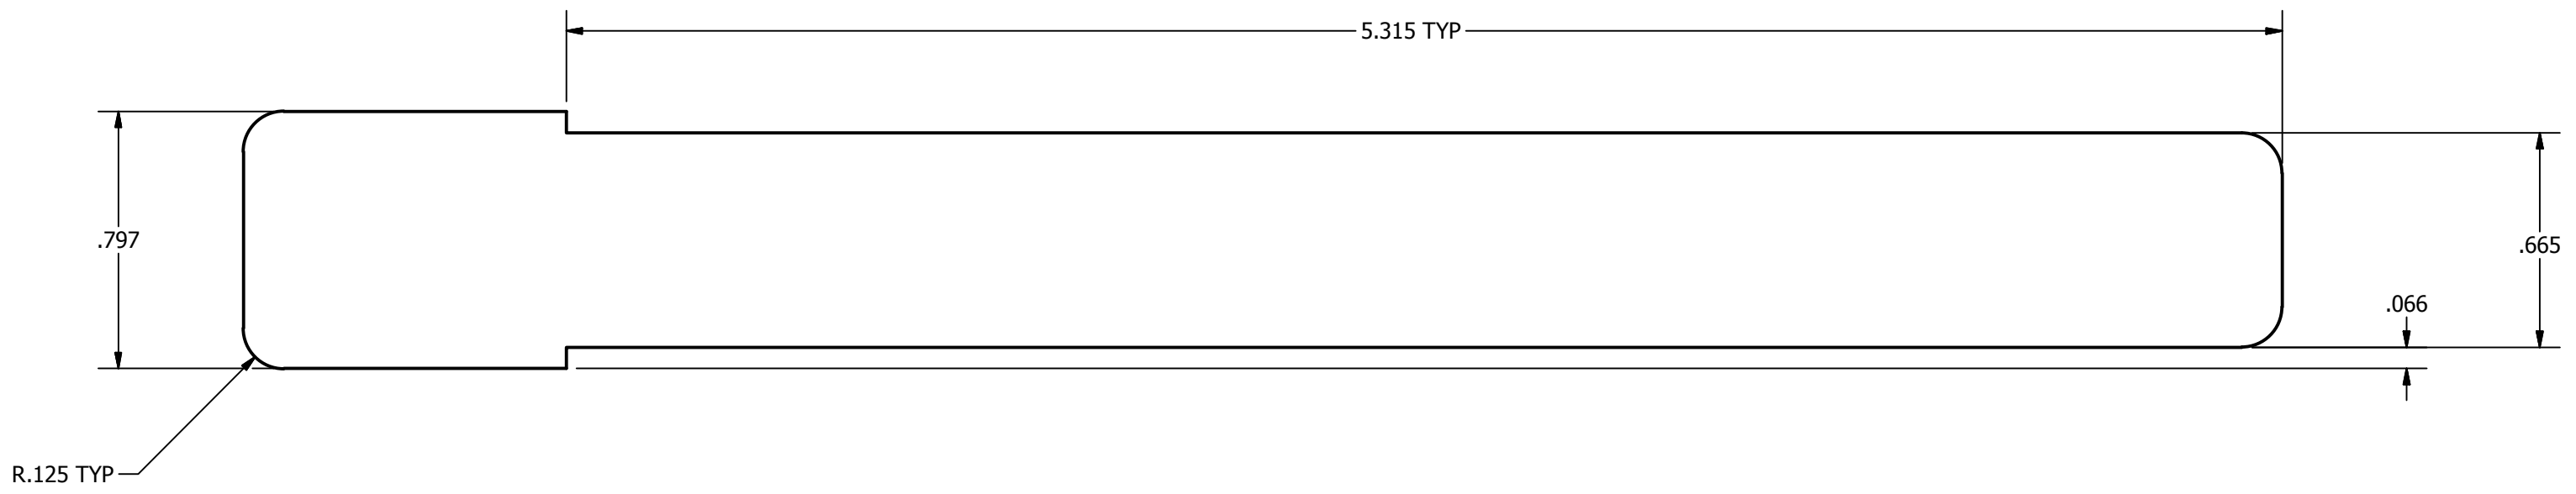

SCALE 2:1

**NOTICE:**  
 INFORMATION CONTAINED IN THIS DOCUMENT OR ANY REPRODUCTION THEREOF, IS PROPRIETARY INFORMATION AND PROPERTY OF HOWARD HUGHES MEDICAL INSTITUTE. IT SHALL NOT BE DISCLOSED, COPIED, DUPLICATED OR USED FOR MANUFACTURE, PRODUCTION OR PROCUREMENT, WITHOUT THE EXPRESS WRITTEN PERMISSION OF HOWARD HUGHES MEDICAL INSTITUTE.

(UNLESS SPECIFIED OTHERWISE)  
 PRIMARY UNITS: INCHES  
 [SECONDARY UNITS]: MILLIMETERS

PRIMARY TOLERANCES:  
 X.X ± 0.020  
 X.XX ± 0.010  
 X.XXX ± 0.005  
 X.XXXX ± 0.0005  
 ANGULAR ± 0.5 DEG

- DO NOT SCALE DRAWING -

THIRD ANGLE PROJECTION:

|                                     |  |                                                |             |
|-------------------------------------|--|------------------------------------------------|-------------|
| <br>HOWARD HUGHES MEDICAL INSTITUTE |  | <b>24 CHAMBER PARTITION SLIDE - SINGLE.ipt</b> |             |
|                                     |  | SIZE C                                         | PART NUMBER |
| REV 0                               |  | SHEET 1 OF 1                                   |             |

4

3

2

1

GENERAL NOTES:

- 1. MATERIAL: CLEAR ACRYLIC
- 2. SPECIAL FINISH:
- 3. SURFACE ROUGHNESS (UNLESS SPECIFIED OTHERWISE):
- 4. INTERPRET DIMENSIONS AND TOLERANCES PER ASME Y14.5M-1994
- 5. DEBURR AND BREAK ALL SHARP EDGES, MAX 0.010" (UNLESS SPECIFIED OTHERWISE)
- 6. PARTS ARE TO BE CLEAN AND FREE OF OIL, GREASE, AND OTHER CONTAMINANTS
- 7. DIMENSIONS INCLUDE CHEMICALLY APPLIED FINISHES IF APPLICABLE

| ZONE |  | REV | REVISION HISTORY DESCRIPTION | DATE | APPROVED |
|------|--|-----|------------------------------|------|----------|
|      |  |     |                              |      |          |

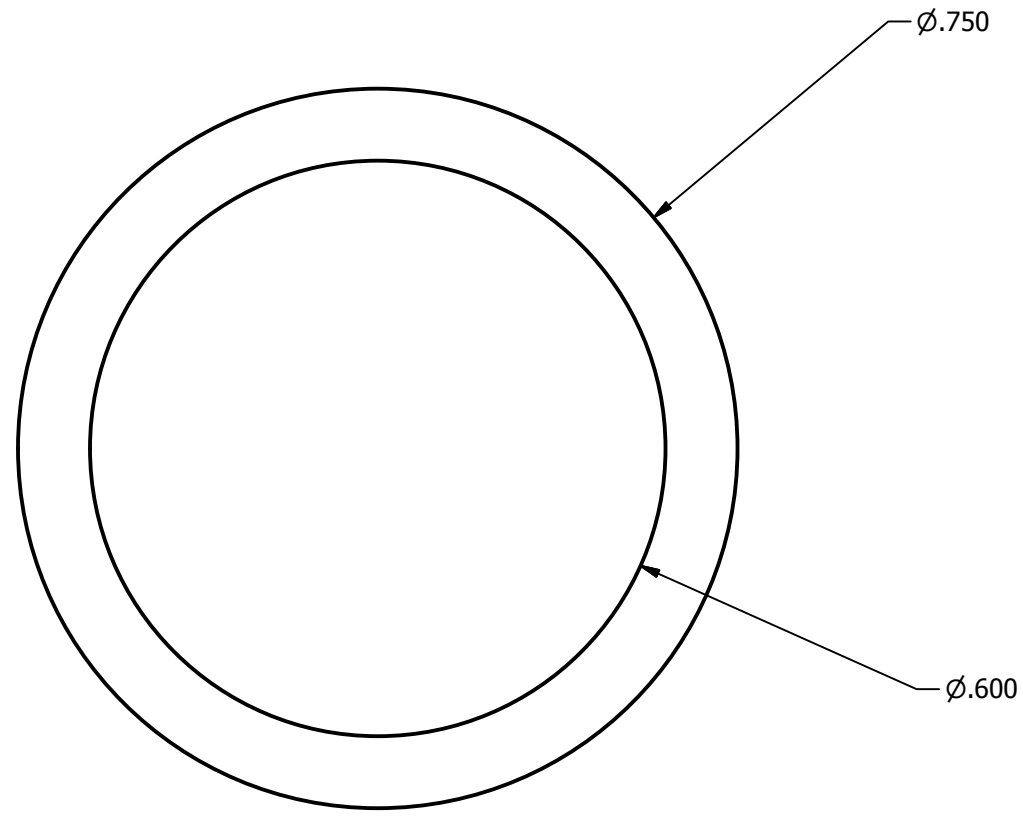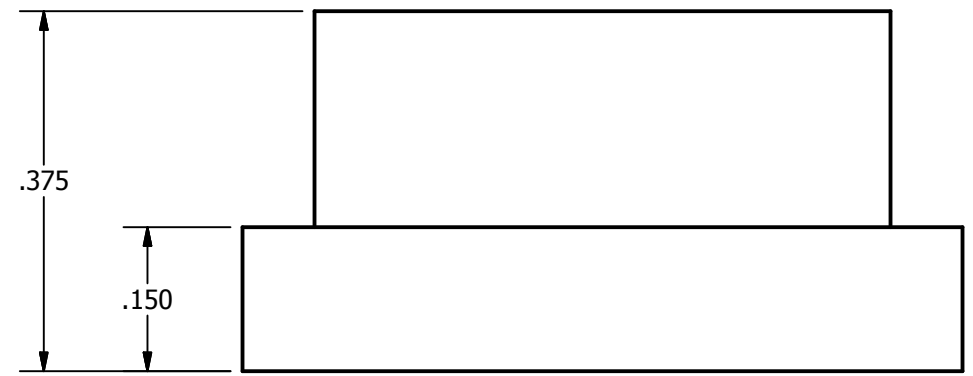

SCALE 5:1

NOTICE:  
 INFORMATION CONTAINED IN THIS DOCUMENT OR ANY REPRODUCTION THEREOF, IS PROPRIETARY INFORMATION AND PROPERTY OF HOWARD HUGHES MEDICAL INSTITUTE. IT SHALL NOT BE DISCLOSED, COPIED, DUPLICATED OR USED FOR MANUFACTURE, PRODUCTION OR PROCUREMENT, WITHOUT THE EXPRESS WRITTEN PERMISSION OF HOWARD HUGHES MEDICAL INSTITUTE.

(UNLESS SPECIFIED OTHERWISE)  
 PRIMARY UNITS: INCHES  
 [SECONDARY UNITS]: MILLIMETERS

PRIMARY TOLERANCES:  
 X.X ± 0.020  
 X.XX ± 0.010  
 X.XXX ± 0.005  
 X.XXXX ± 0.0005  
 ANGULAR ± 0.5 DEG

- DO NOT SCALE DRAWING -  
 THIRD ANGLE PROJECTION:

**HHMI** HOWARD HUGHES MEDICAL INSTITUTE

HHMI *janelia farm* research campus

24 CHAMBER VIEWING GLASS.ipt

|           |                                          |     |                 |
|-----------|------------------------------------------|-----|-----------------|
| SIZE<br>C | PART NUMBER<br><b>24 CHAMBER VIEWING</b> | REV | SHEET<br>1 OF 1 |
|-----------|------------------------------------------|-----|-----------------|

GLASS 1

4

3

2

1

GENERAL NOTES:

- 1. MATERIAL: (SEE PARTS LIST)
- 2. SPECIAL FINISH:
- 3. SURFACE ROUGHNESS (UNLESS SPECIFIED OTHERWISE):
- 4. INTERPRET DIMENSIONS AND TOLERANCES PER ASME Y14.5M-1994
- 5. DEBURR AND BREAK ALL SHARP EDGES, MAX 0.010" (UNLESS SPECIFIED OTHERWISE)
- 6. PARTS ARE TO BE CLEAN AND FREE OF OIL, GREASE, AND OTHER CONTAMINANTS
- 7. DIMENSIONS INCLUDE CHEMICALLY APPLIED FINISHES IF APPLICABLE

| ZONE |  | REV | REVISION HISTORY DESCRIPTION | DATE | APPROVED |
|------|--|-----|------------------------------|------|----------|
|      |  |     |                              |      |          |

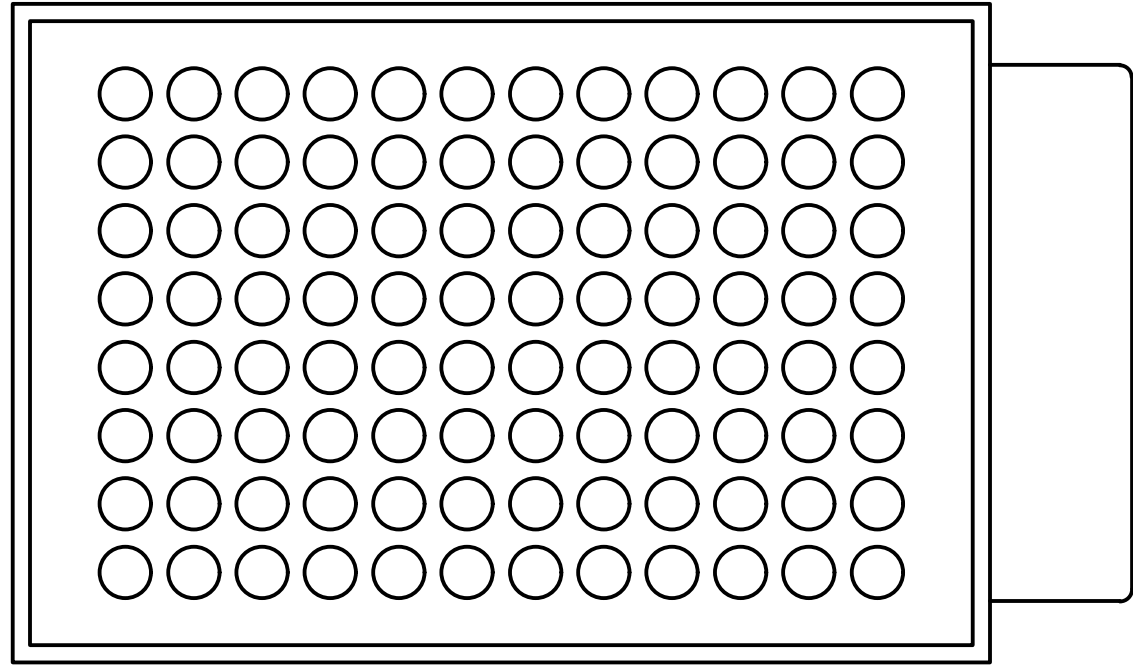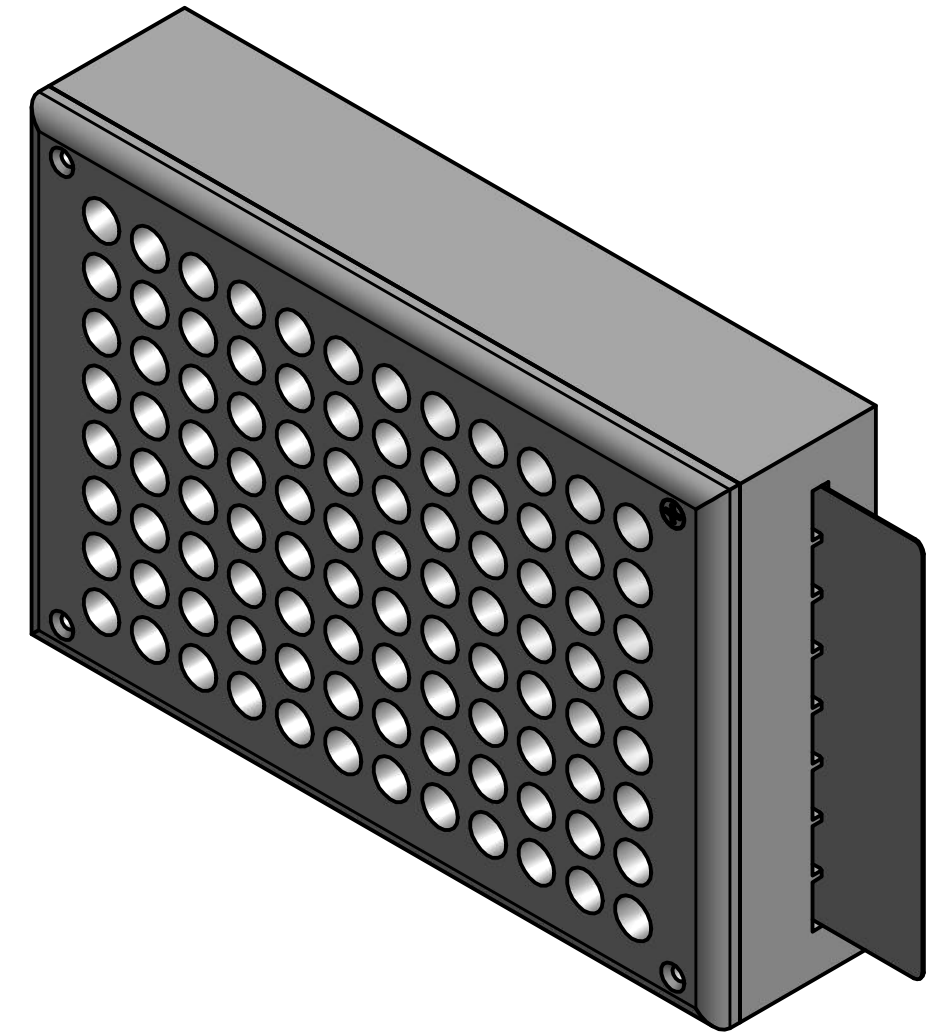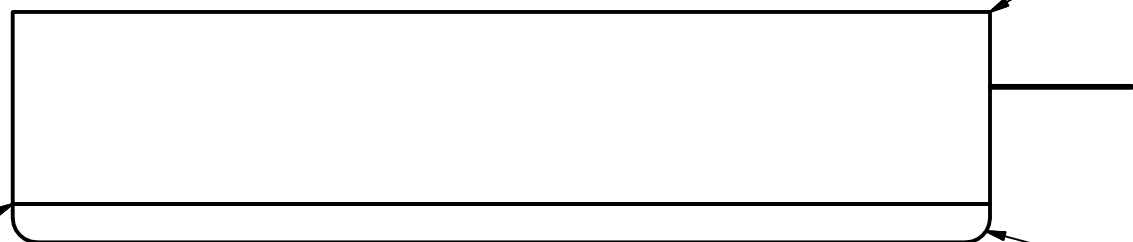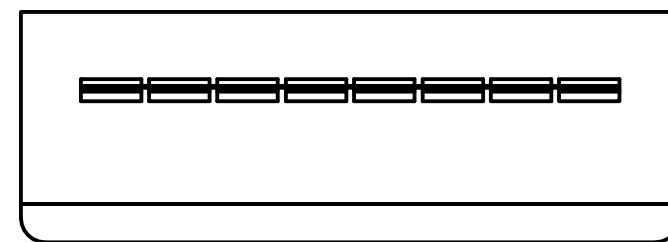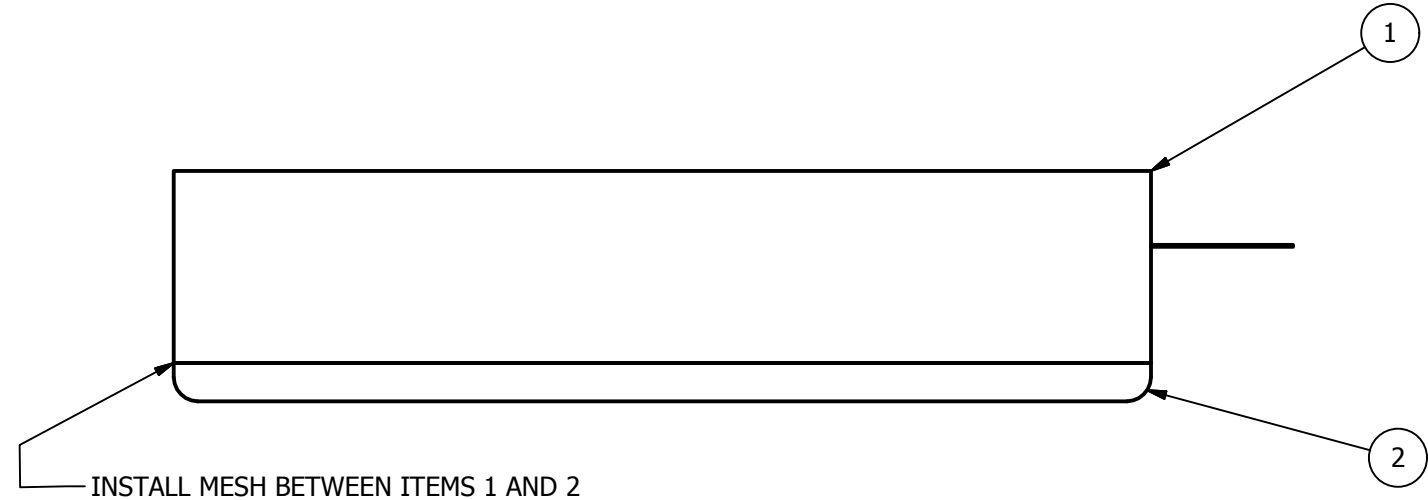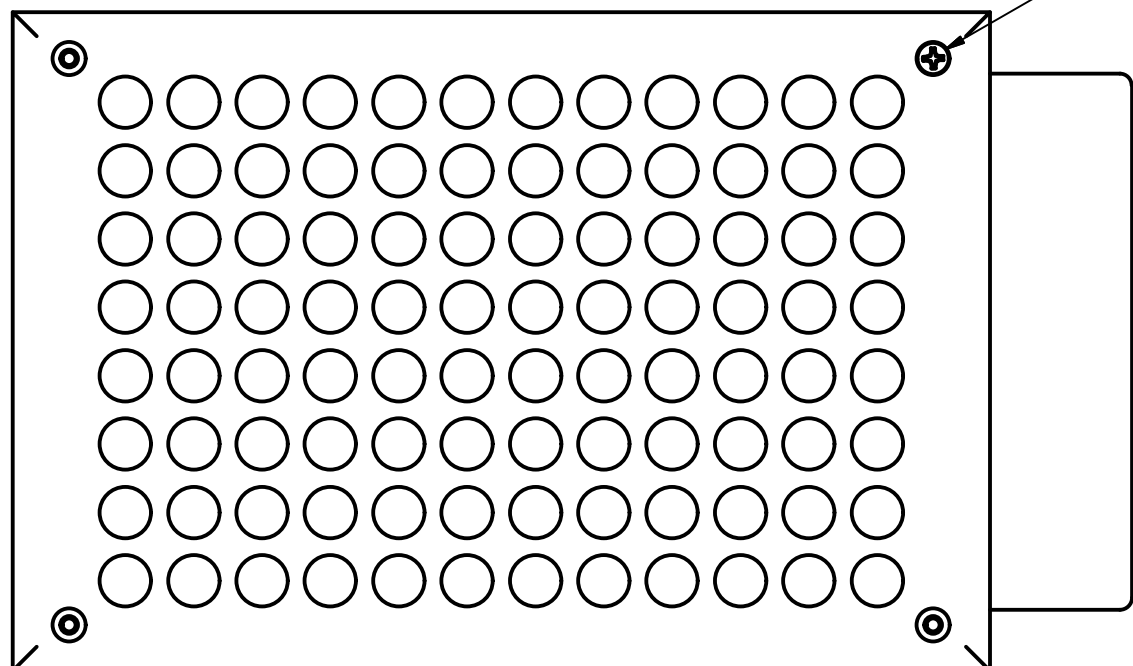

| ITEM | QTY | FILE NAME                      | REV | PART NUMBER                | DESCRIPTION |
|------|-----|--------------------------------|-----|----------------------------|-------------|
| 1    | 1   | 96 CHAMBER COMPARTMENTS.ipt    |     | 96 CHAMBER COMPARTMENTS    |             |
| 2    | 1   | 96 CHAMBER SCREEN HOLDER.ipt   |     | 96 CHAMBER SCREEN HOLDER   |             |
| 3    | 1   | 96 CHAMBER PARTITION SLIDE.ipt |     | 96 CHAMBER PARTITION SLIDE |             |
| 4    | 4   | 2-56X5-16 FLATHEAD SCREW.ipt   |     | 2-56X5-16 FLATHEAD SCREW   |             |

PARTS LIST

**NOTICE:**  
 INFORMATION CONTAINED IN THIS DOCUMENT OR ANY REPRODUCTION THEREOF, IS PROPRIETARY INFORMATION AND PROPERTY OF HOWARD HUGHES MEDICAL INSTITUTE. IT SHALL NOT BE DISCLOSED, COPIED, DUPLICATED OR USED FOR MANUFACTURE, PRODUCTION OR PROCUREMENT, WITHOUT THE EXPRESS WRITTEN PERMISSION OF HOWARD HUGHES MEDICAL INSTITUTE.

(UNLESS SPECIFIED OTHERWISE)  
 PRIMARY UNITS: INCHES  
 [SECONDARY UNITS]: MILLIMETERS

PRIMARY TOLERANCES:  
 X.X ± 0.020  
 X.XX ± 0.010  
 X.XXX ± 0.005  
 X.XXXX ± 0.0005  
 ANGULAR ± 0.5 DEG

- DO NOT SCALE DRAWING -  
 THIRD ANGLE PROJECTION:

**HHMI**  
HOWARD HUGHES MEDICAL INSTITUTE

HHMI  
*janelia farm*  
research campus

**96-well chamber assembly**

|      |             |     |        |
|------|-------------|-----|--------|
| SIZE | PART NUMBER | REV | SHEET  |
| C    | 1           | 0   | 1 OF 1 |

4

3

2

1

4

3

2

1

GENERAL NOTES:

- 1. MATERIAL: VERO WHITE
- 2. SPECIAL FINISH:
- 3. SURFACE ROUGHNESS (UNLESS SPECIFIED OTHERWISE):
- 4. INTERPRET DIMENSIONS AND TOLERANCES PER ASME Y14.5M-1994
- 5. DEBURR AND BREAK ALL SHARP EDGES, MAX 0.010" (UNLESS SPECIFIED OTHERWISE)
- 6. PARTS ARE TO BE CLEAN AND FREE OF OIL, GREASE, AND OTHER CONTAMINANTS
- 7. DIMENSIONS INCLUDE CHEMICALLY APPLIED FINISHES IF APPLICABLE

| ZONE |  | REV | REVISION HISTORY DESCRIPTION | DATE | APPROVED |
|------|--|-----|------------------------------|------|----------|
|      |  |     |                              |      |          |

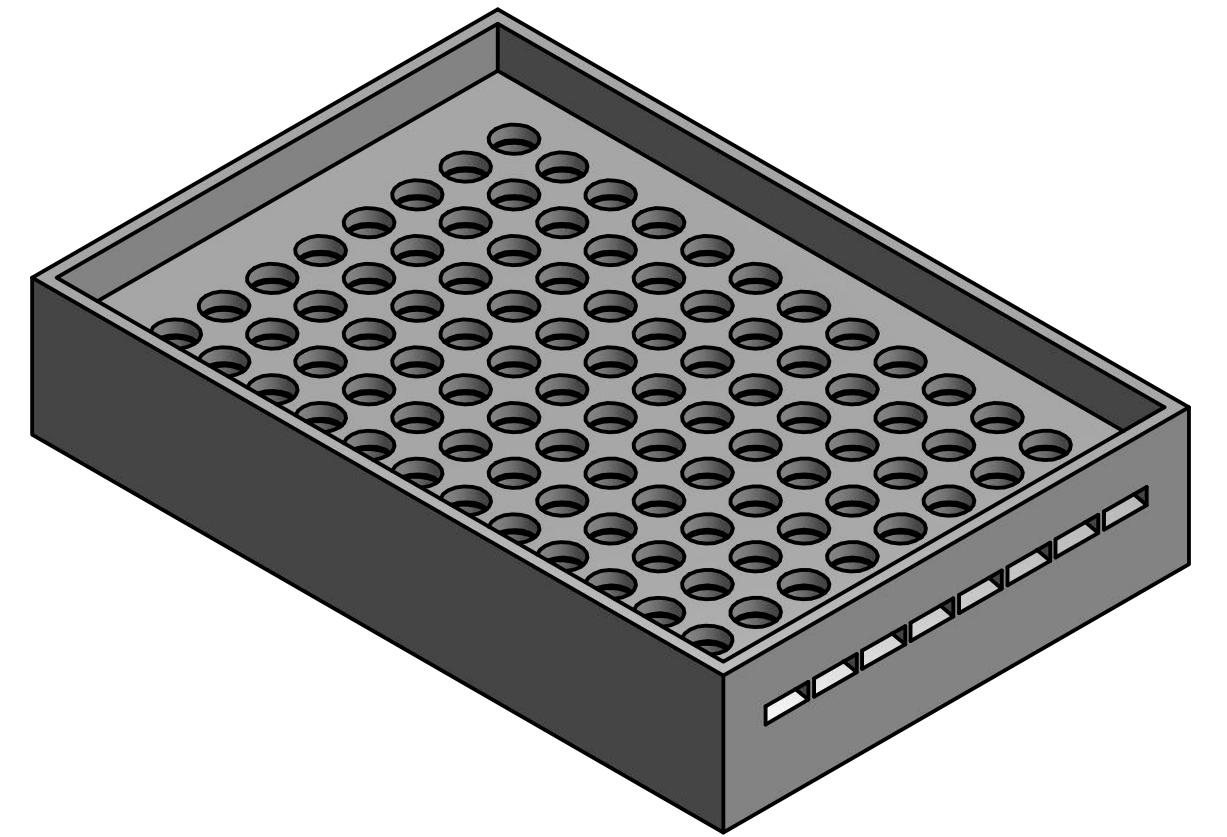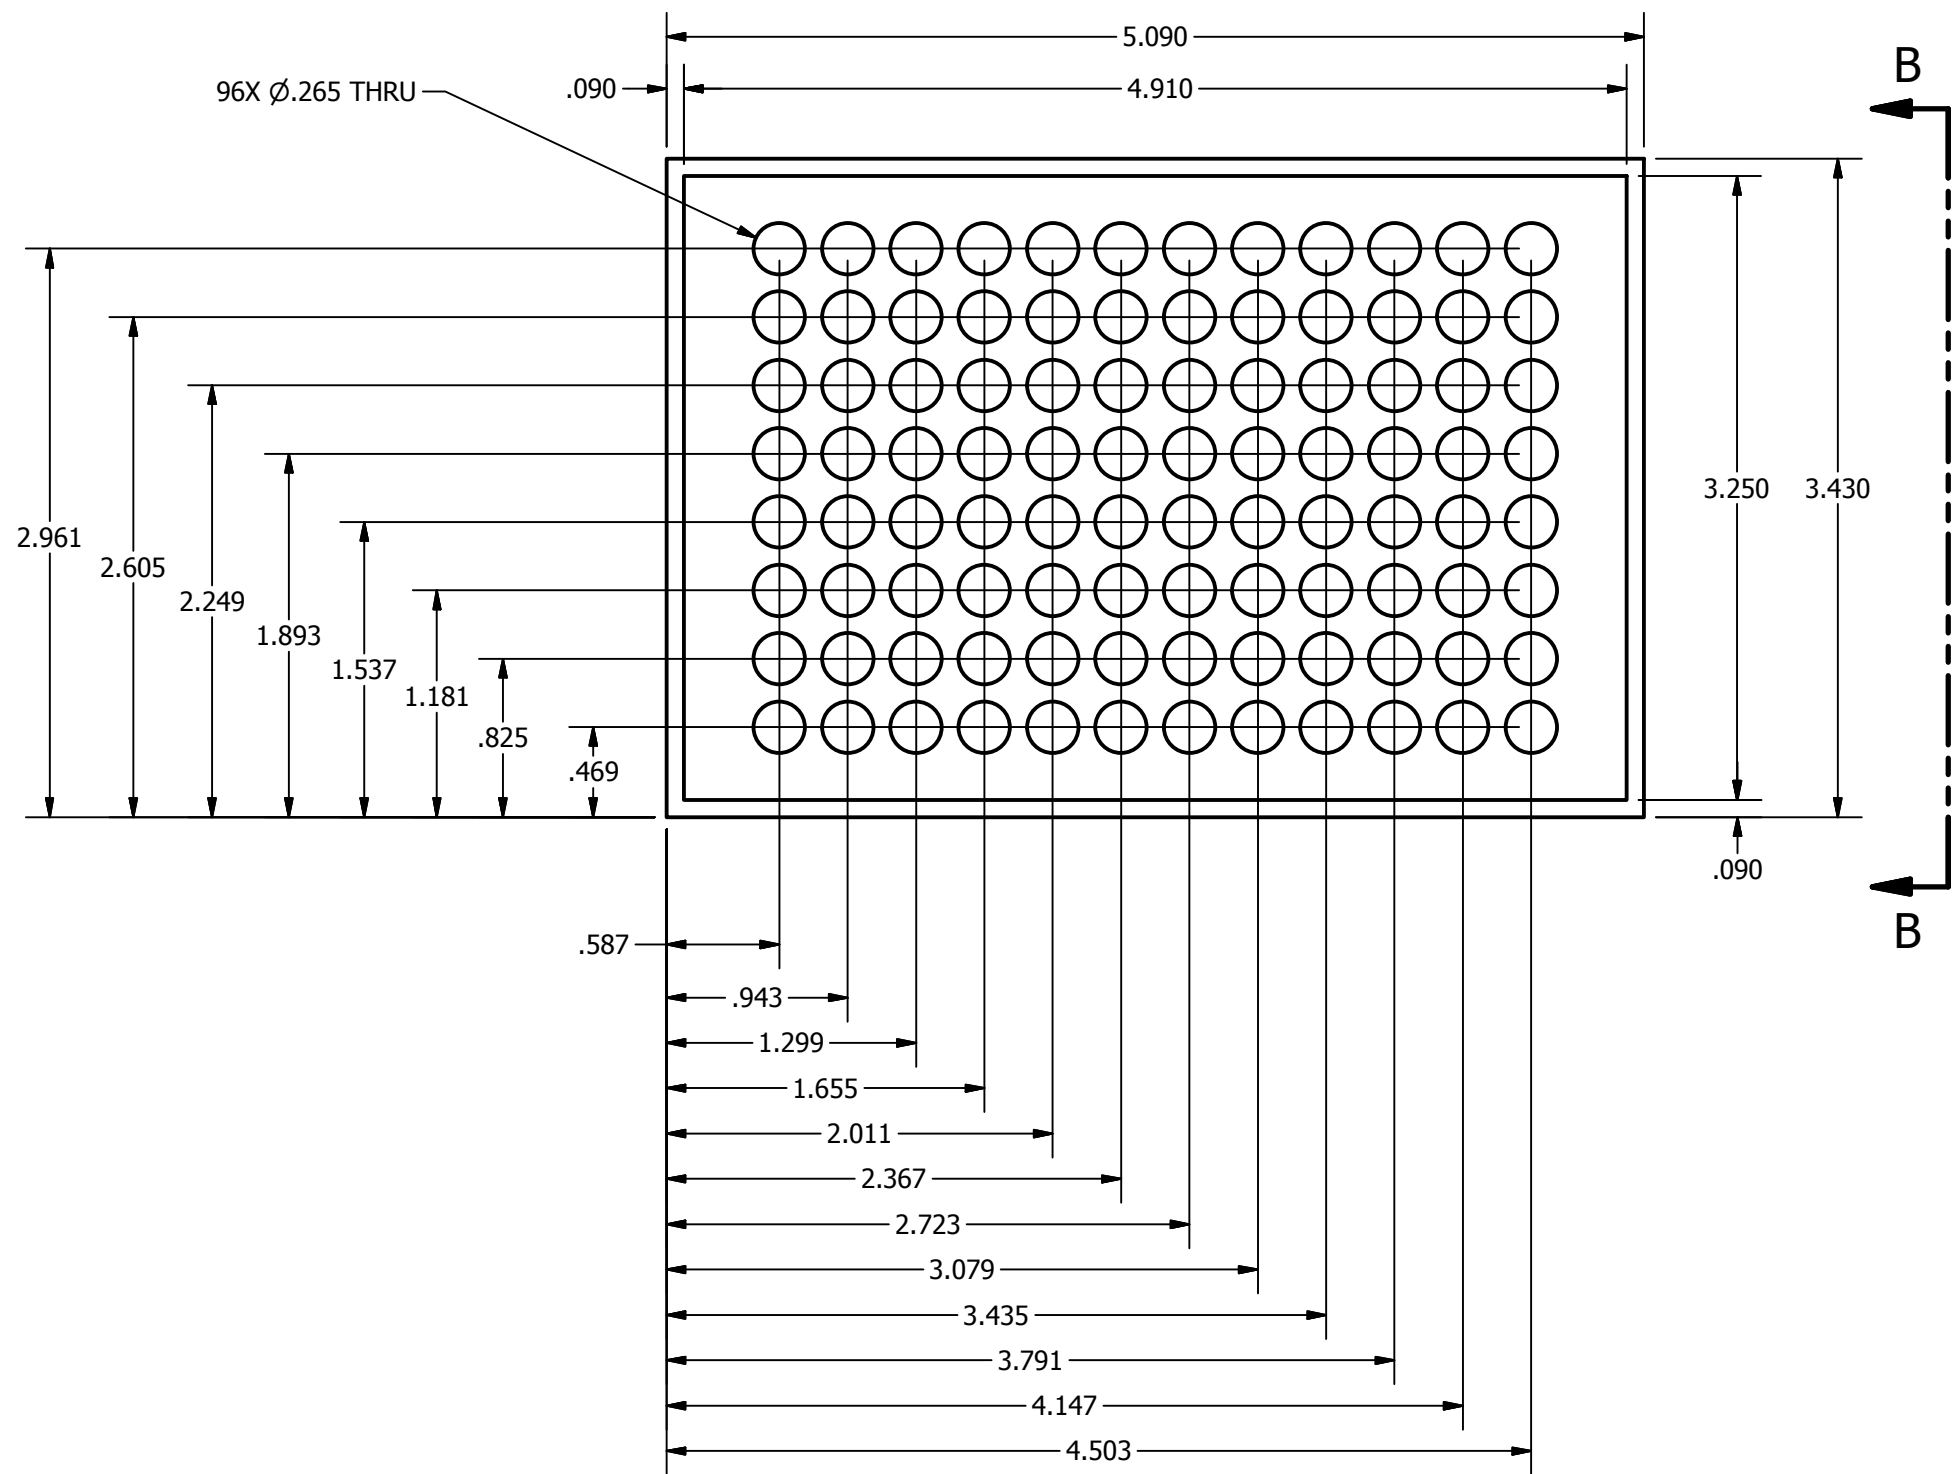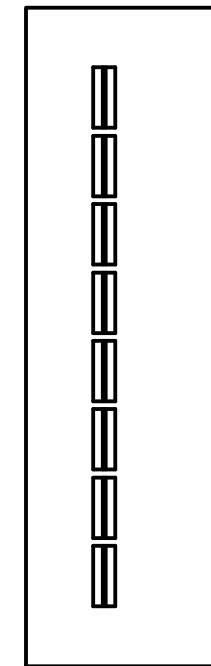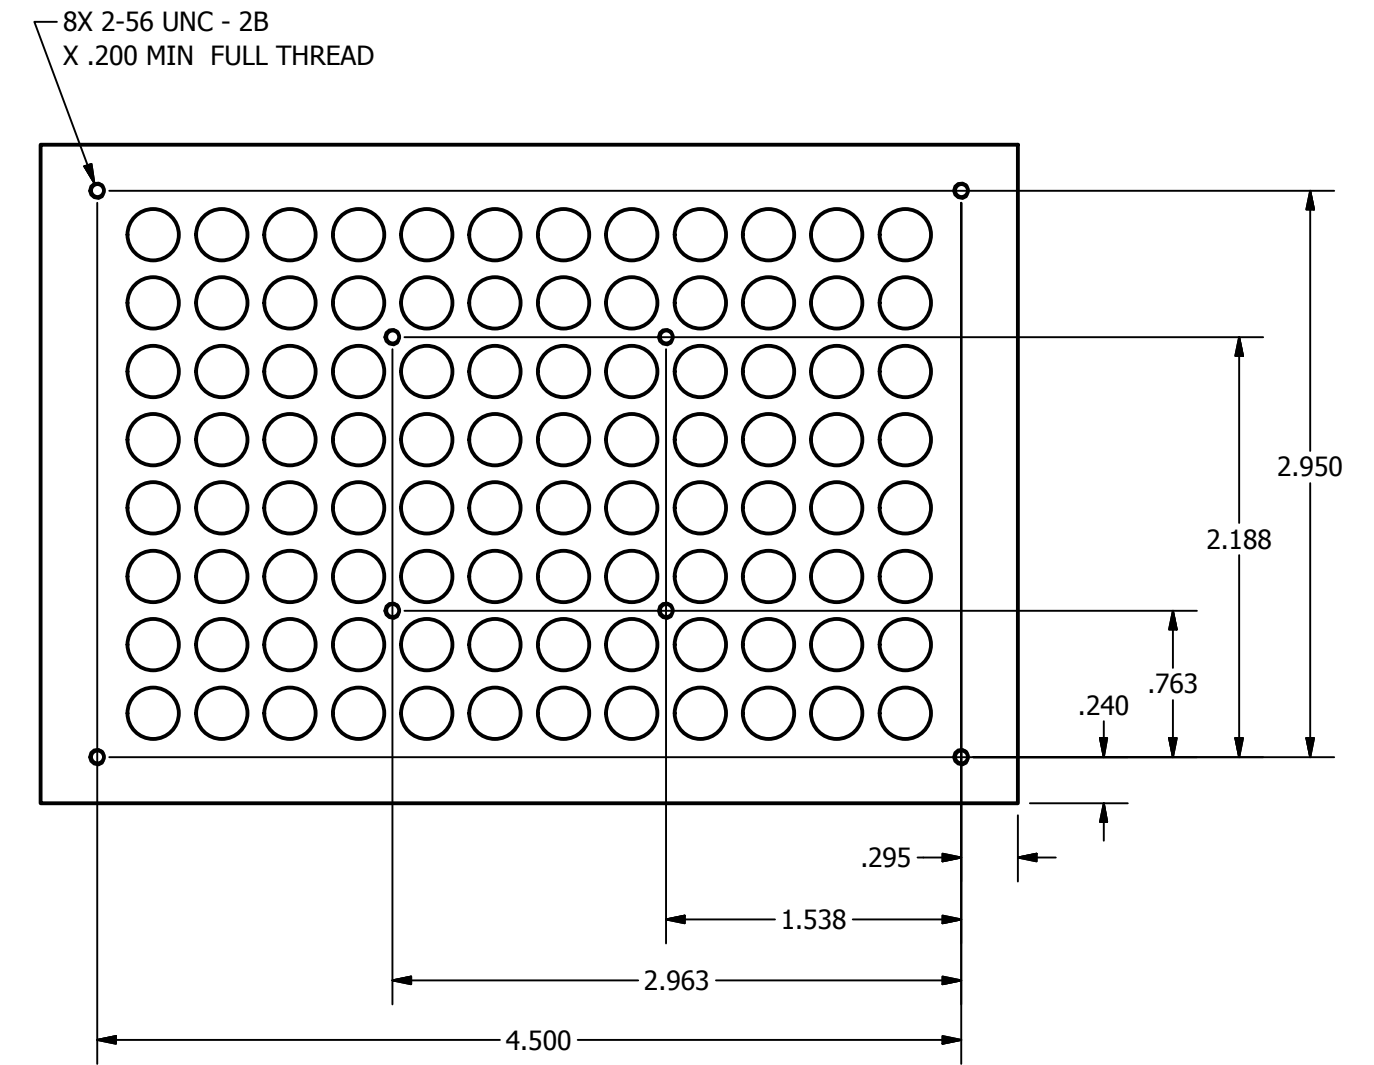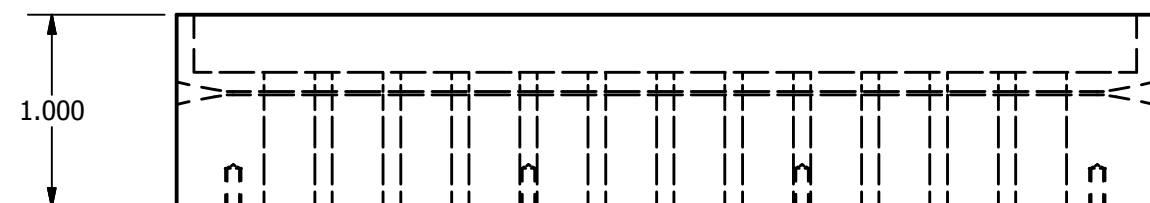

NOTICE:  
 INFORMATION CONTAINED IN THIS DOCUMENT OR ANY REPRODUCTION THEREOF, IS PROPRIETARY INFORMATION AND PROPERTY OF HOWARD HUGHES MEDICAL INSTITUTE. IT SHALL NOT BE DISCLOSED, COPIED, DUPLICATED OR USED FOR MANUFACTURE, PRODUCTION OR PROCUREMENT, WITHOUT THE EXPRESS WRITTEN PERMISSION OF HOWARD HUGHES MEDICAL INSTITUTE.

(UNLESS SPECIFIED OTHERWISE)  
 PRIMARY UNITS: INCHES  
 [SECONDARY UNITS]: MILLIMETERS

PRIMARY TOLERANCES:  
 X.X ± 0.020  
 X.XX ± 0.010  
 X.XXX ± 0.005  
 X.XXXX ± 0.0005  
 ANGULAR ± 0.5 DEG

- DO NOT SCALE DRAWING -  
 THIRD ANGLE PROJECTION:

**HHMI**  
 HOWARD HUGHES MEDICAL INSTITUTE

HHMI  
 janelia farm  
 research campus

**96 CHAMBER COMPARTMENTS.ipt**

|           |                  |          |                 |
|-----------|------------------|----------|-----------------|
| SIZE<br>C | PART NUMBER<br>1 | REV<br>0 | SHEET<br>1 OF 2 |
|-----------|------------------|----------|-----------------|

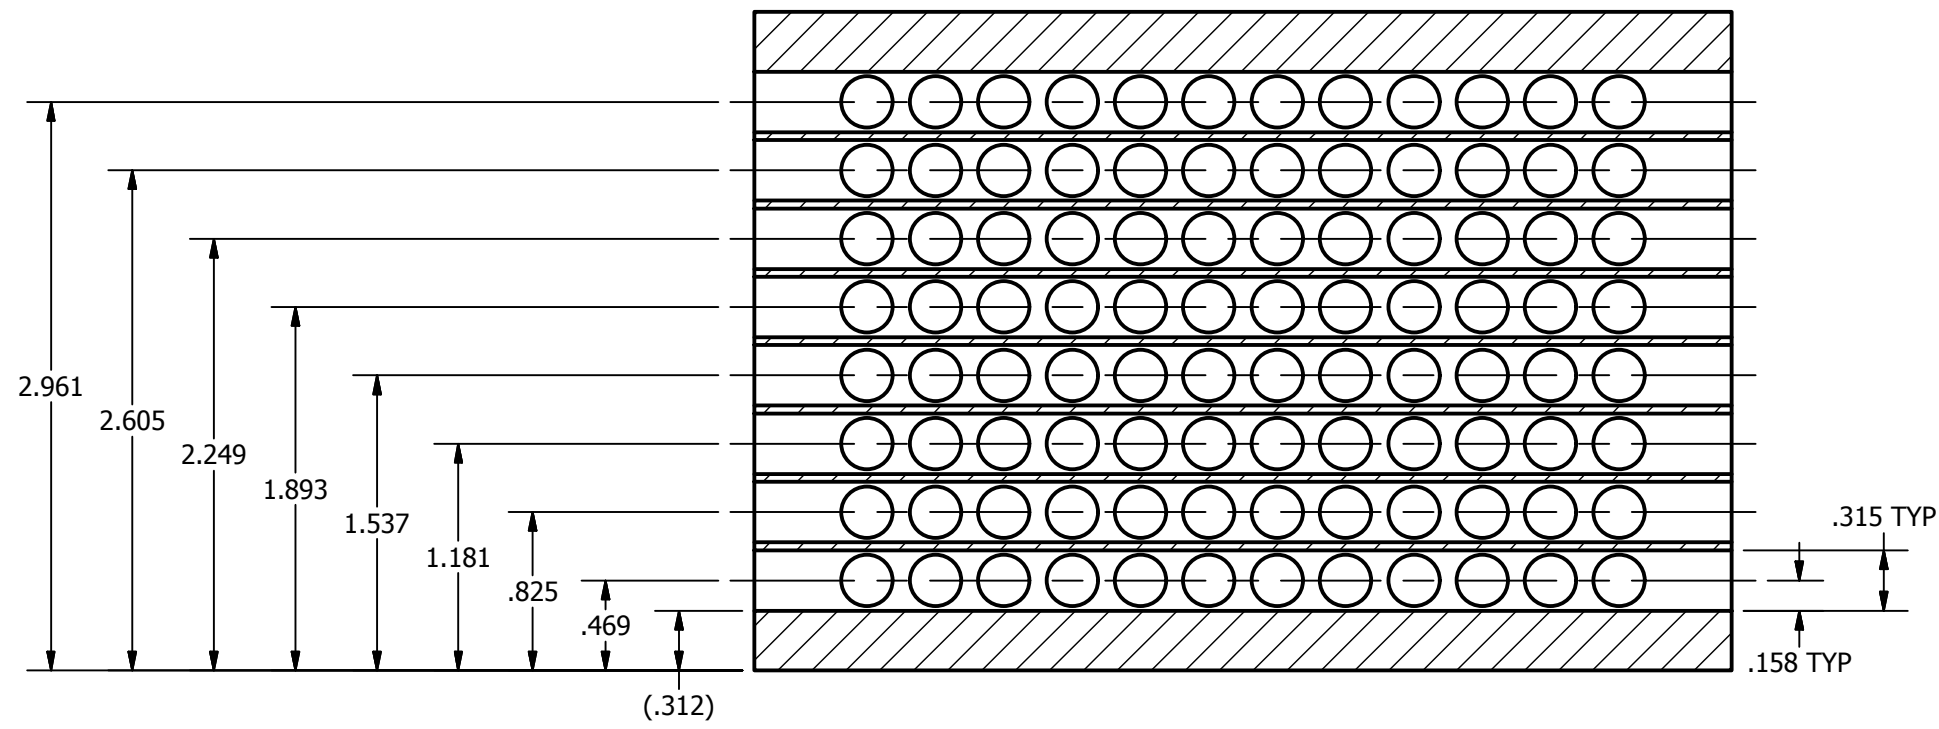

SECTION F-F

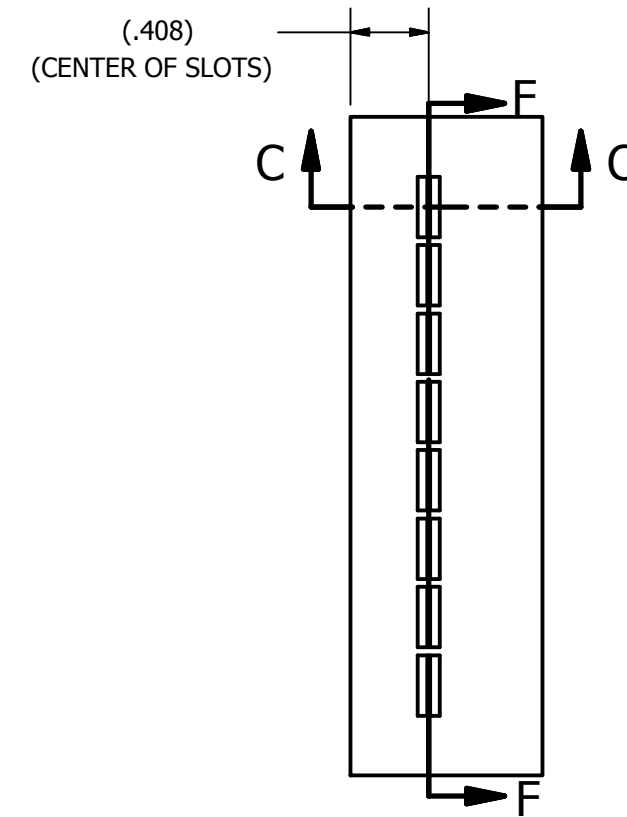

VIEW B-B

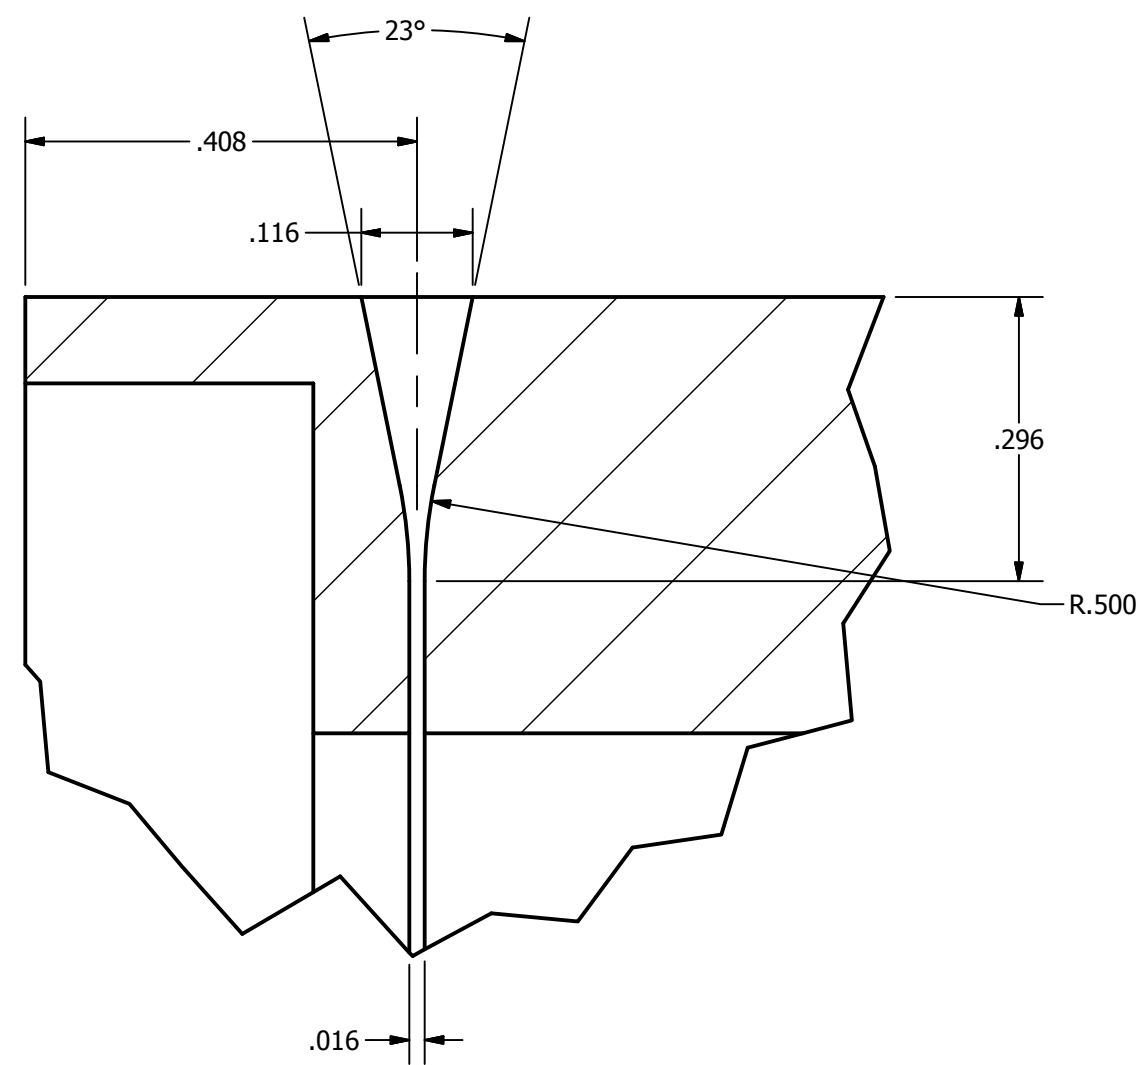

DETAIL E  
TYP FOR 8 SLOTS  
SCALE 5:1

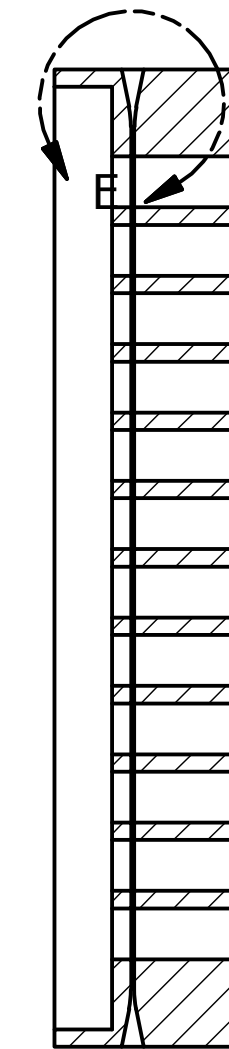

SECTION C-C

NOTICE:  
INFORMATION CONTAINED IN THIS DOCUMENT OR ANY REPRODUCTION THEREOF, IS PROPRIETARY INFORMATION AND PROPERTY OF HOWARD HUGHES MEDICAL INSTITUTE. IT SHALL NOT BE DISCLOSED, COPIED, DUPLICATED OR USED FOR MANUFACTURE, PRODUCTION OR PROCUREMENT, WITHOUT THE EXPRESS WRITTEN PERMISSION OF HOWARD HUGHES MEDICAL INSTITUTE.

(UNLESS SPECIFIED OTHERWISE)  
PRIMARY UNITS: INCHES  
[SECONDARY UNITS]: MILLIMETERS  
PRIMARY TOLERANCES:  
X.X ± 0.020  
X.XX ± 0.010  
X.XXX ± 0.005  
X.XXXX ± 0.0005  
ANGULAR ± 0.5 DEG  
- DO NOT SCALE DRAWING -  
THIRD ANGLE PROJECTION:

**HHMI**  
HOWARD HUGHES MEDICAL INSTITUTE

HHMI  
*janelia farm*  
research campus

**96 CHAMBER COMPARTMENTS.ipt**

|           |                  |          |                 |
|-----------|------------------|----------|-----------------|
| SIZE<br>C | PART NUMBER<br>1 | REV<br>0 | SHEET<br>2 OF 2 |
|-----------|------------------|----------|-----------------|

4

3

2

1

GENERAL NOTES:

- 1. MATERIAL: VERO WHITE
- 2. SPECIAL FINISH:
- 3. SURFACE ROUGHNESS (UNLESS SPECIFIED OTHERWISE):
- 4. INTERPRET DIMENSIONS AND TOLERANCES PER ASME Y14.5M-1994
- 5. DEBURR AND BREAK ALL SHARP EDGES, MAX 0.010" (UNLESS SPECIFIED OTHERWISE)
- 6. PARTS ARE TO BE CLEAN AND FREE OF OIL, GREASE, AND OTHER CONTAMINANTS
- 7. DIMENSIONS INCLUDE CHEMICALLY APPLIED FINISHES IF APPLICABLE

| ZONE |  | REV | REVISION HISTORY DESCRIPTION | DATE | APPROVED |
|------|--|-----|------------------------------|------|----------|
|      |  |     |                              |      |          |

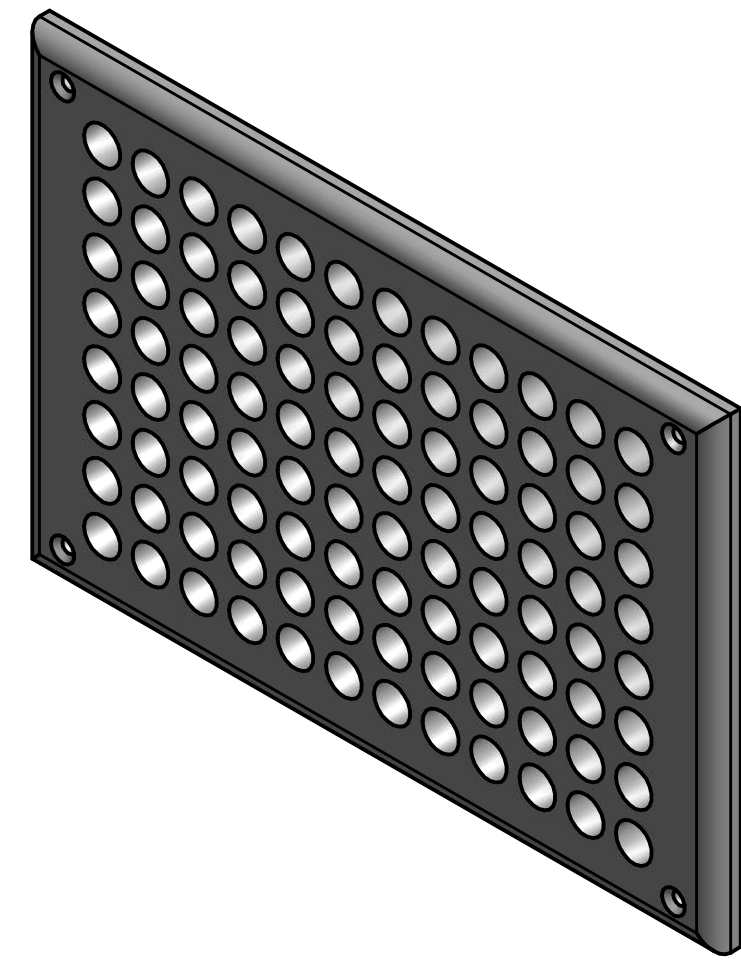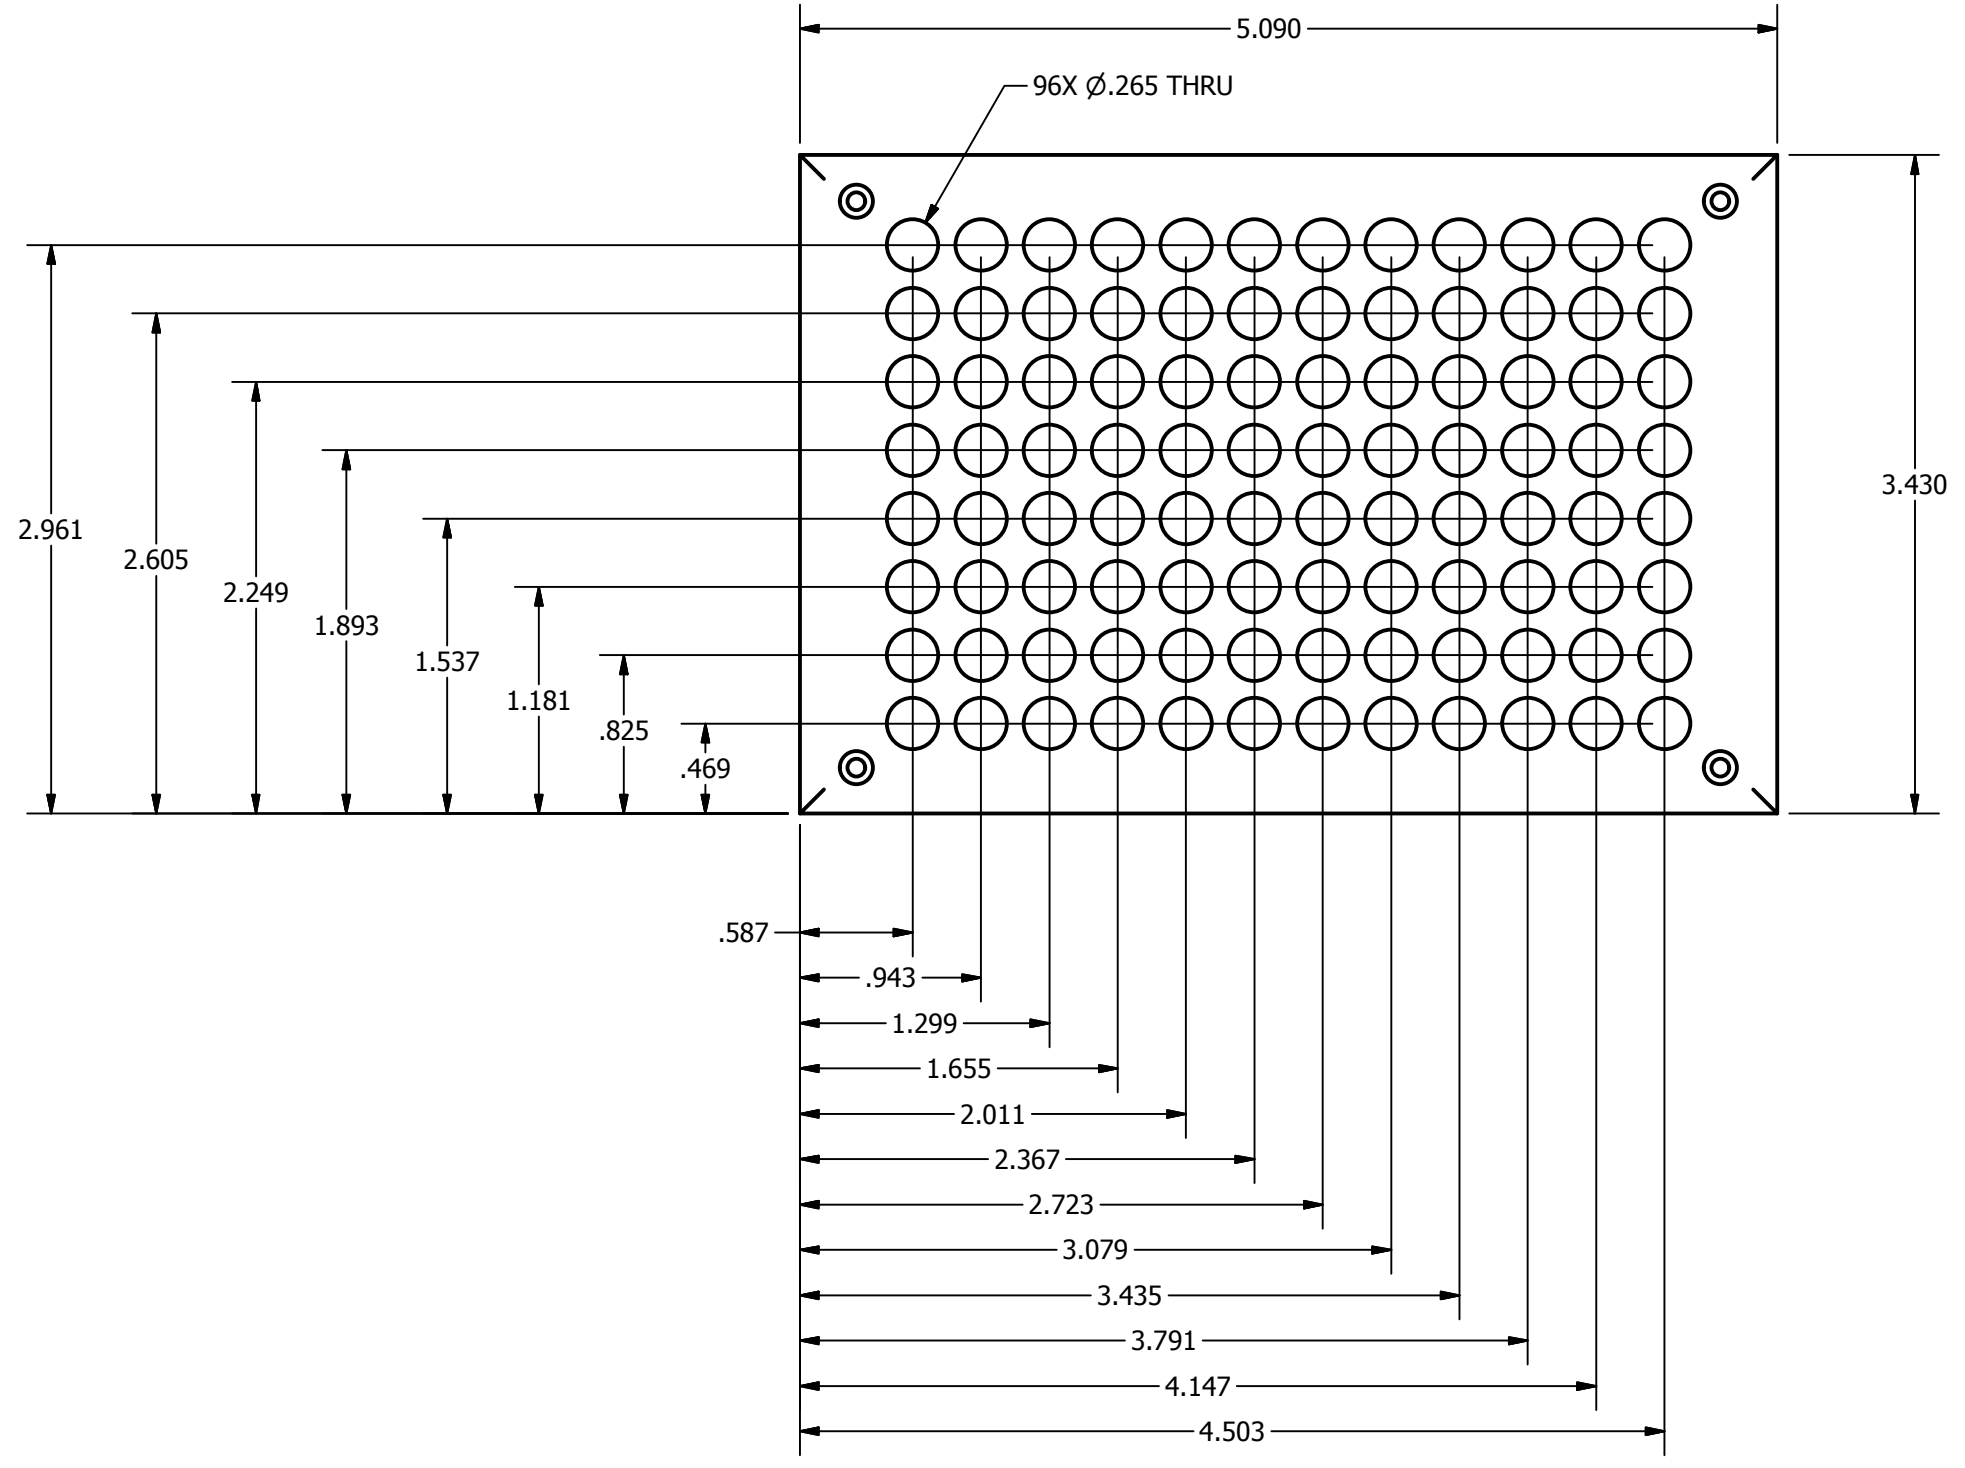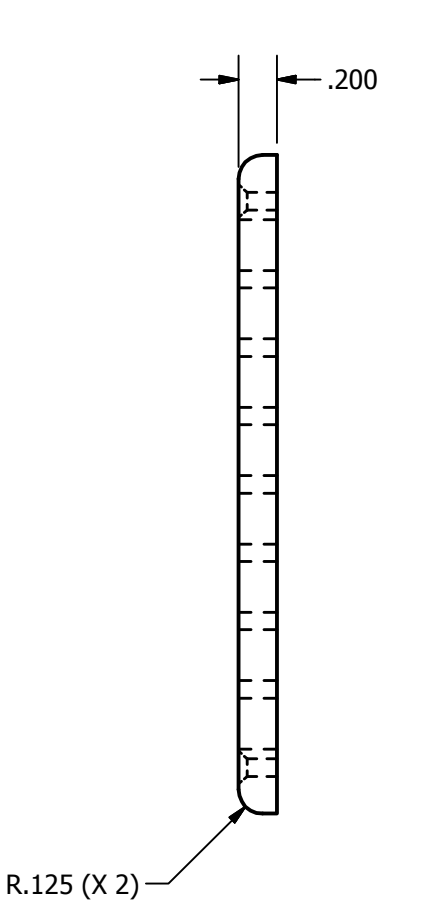

4X Ø.093 THRU  
 ✓ Ø.17 X 82°  
 FAR SIDE

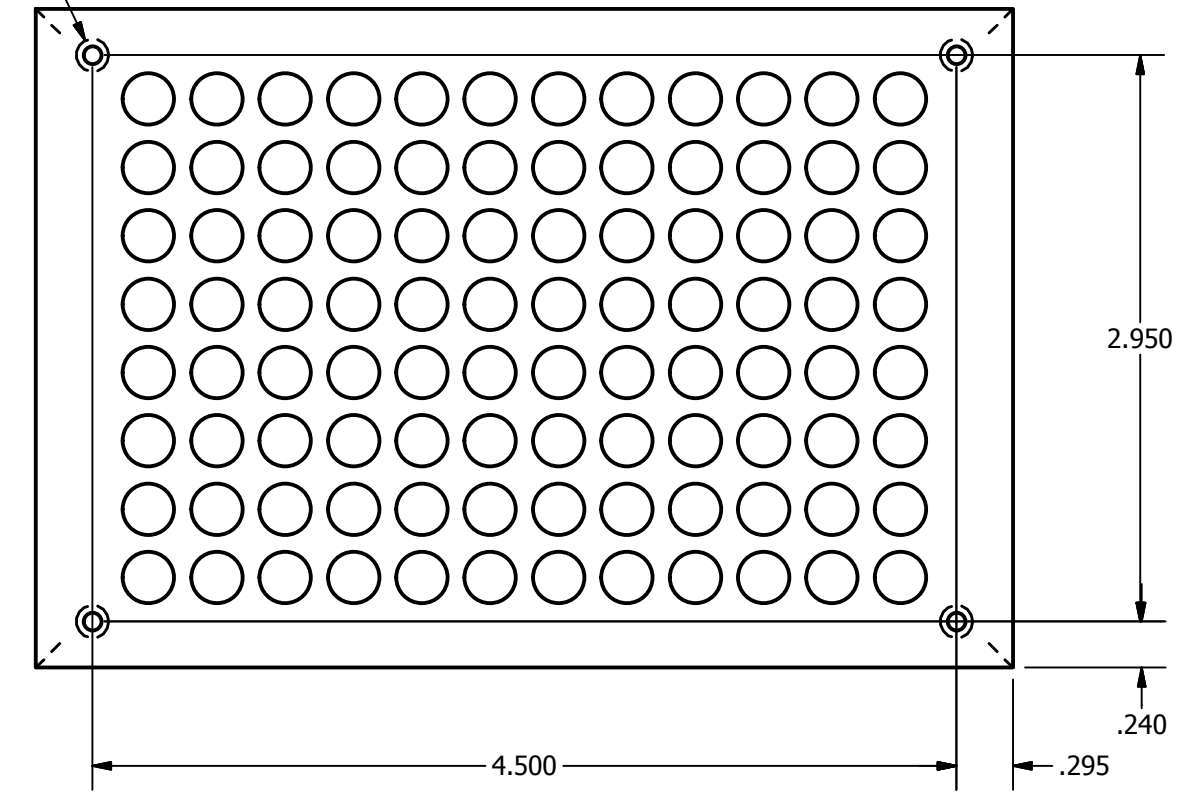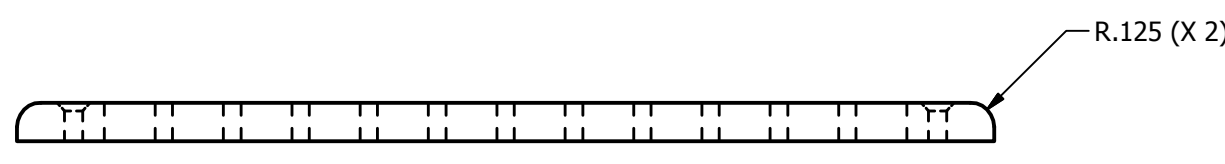

NOTICE:  
 INFORMATION CONTAINED IN THIS DOCUMENT OR ANY REPRODUCTION THEREOF, IS PROPRIETARY INFORMATION AND PROPERTY OF HOWARD HUGHES MEDICAL INSTITUTE. IT SHALL NOT BE DISCLOSED, COPIED, DUPLICATED OR USED FOR MANUFACTURE, PRODUCTION OR PROCUREMENT, WITHOUT THE EXPRESS WRITTEN PERMISSION OF HOWARD HUGHES MEDICAL INSTITUTE.

(UNLESS SPECIFIED OTHERWISE)  
 PRIMARY UNITS: INCHES  
 [SECONDARY UNITS]: MILLIMETERS

PRIMARY TOLERANCES:  
 X.X ± 0.020  
 X.XX ± 0.010  
 X.XXX ± 0.005  
 X.XXXX ± 0.0005  
 ANGULAR ± 0.5 DEG

- DO NOT SCALE DRAWING -  
 THIRD ANGLE PROJECTION:

|                                       |             |     |        |
|---------------------------------------|-------------|-----|--------|
| <br>HOWARD HUGHES MEDICAL INSTITUTE   |             |     |        |
| <h3>96 CHAMBER SCREEN HOLDER.ipt</h3> |             |     |        |
| SIZE                                  | PART NUMBER | REV | SHEET  |
| C                                     | 1           | 0   | 1 OF 1 |



4

3

2

1

GENERAL NOTES:

- 1. MATERIAL: VERO, WHITE
- 2. SPECIAL FINISH:
- 3. SURFACE ROUGHNESS (UNLESS SPECIFIED OTHERWISE):
- 4. INTERPRET DIMENSIONS AND TOLERANCES PER ASME Y14.5M-1994
- 5. DEBURR AND BREAK ALL SHARP EDGES, MAX 0.010" (UNLESS SPECIFIED OTHERWISE)
- 6. PARTS ARE TO BE CLEAN AND FREE OF OIL, GREASE, AND OTHER CONTAMINANTS
- 7. DIMENSIONS INCLUDE CHEMICALLY APPLIED FINISHES IF APPLICABLE

| ZONE |  | REV | REVISION HISTORY<br>DESCRIPTION | DATE | APPROVED |
|------|--|-----|---------------------------------|------|----------|
|      |  |     |                                 |      |          |

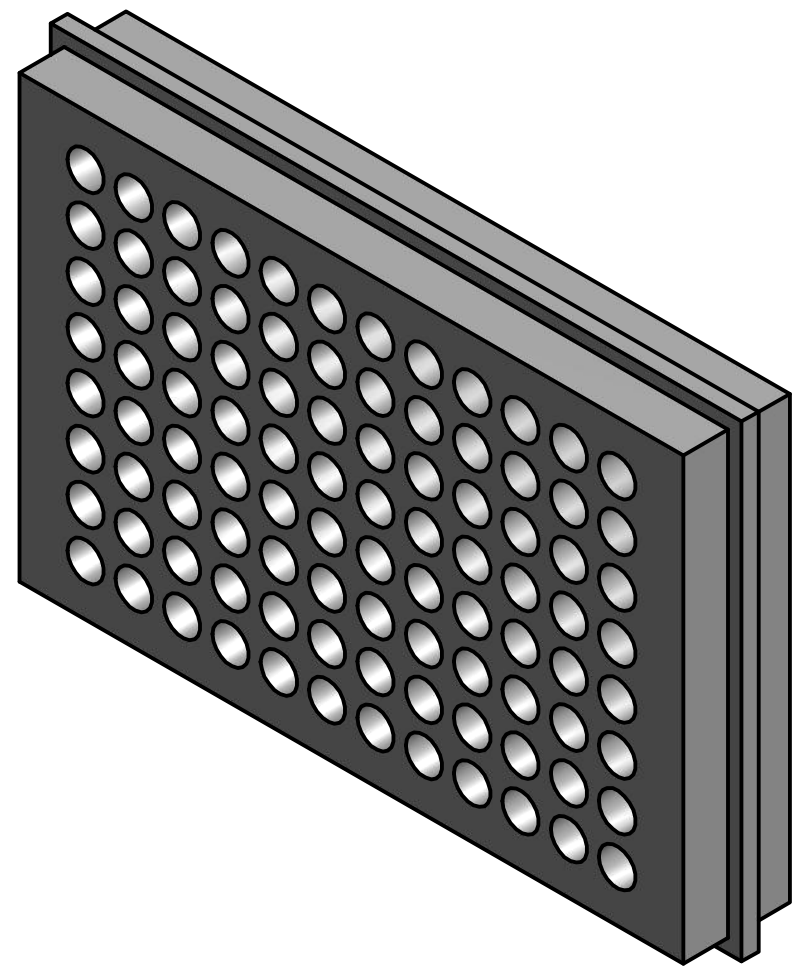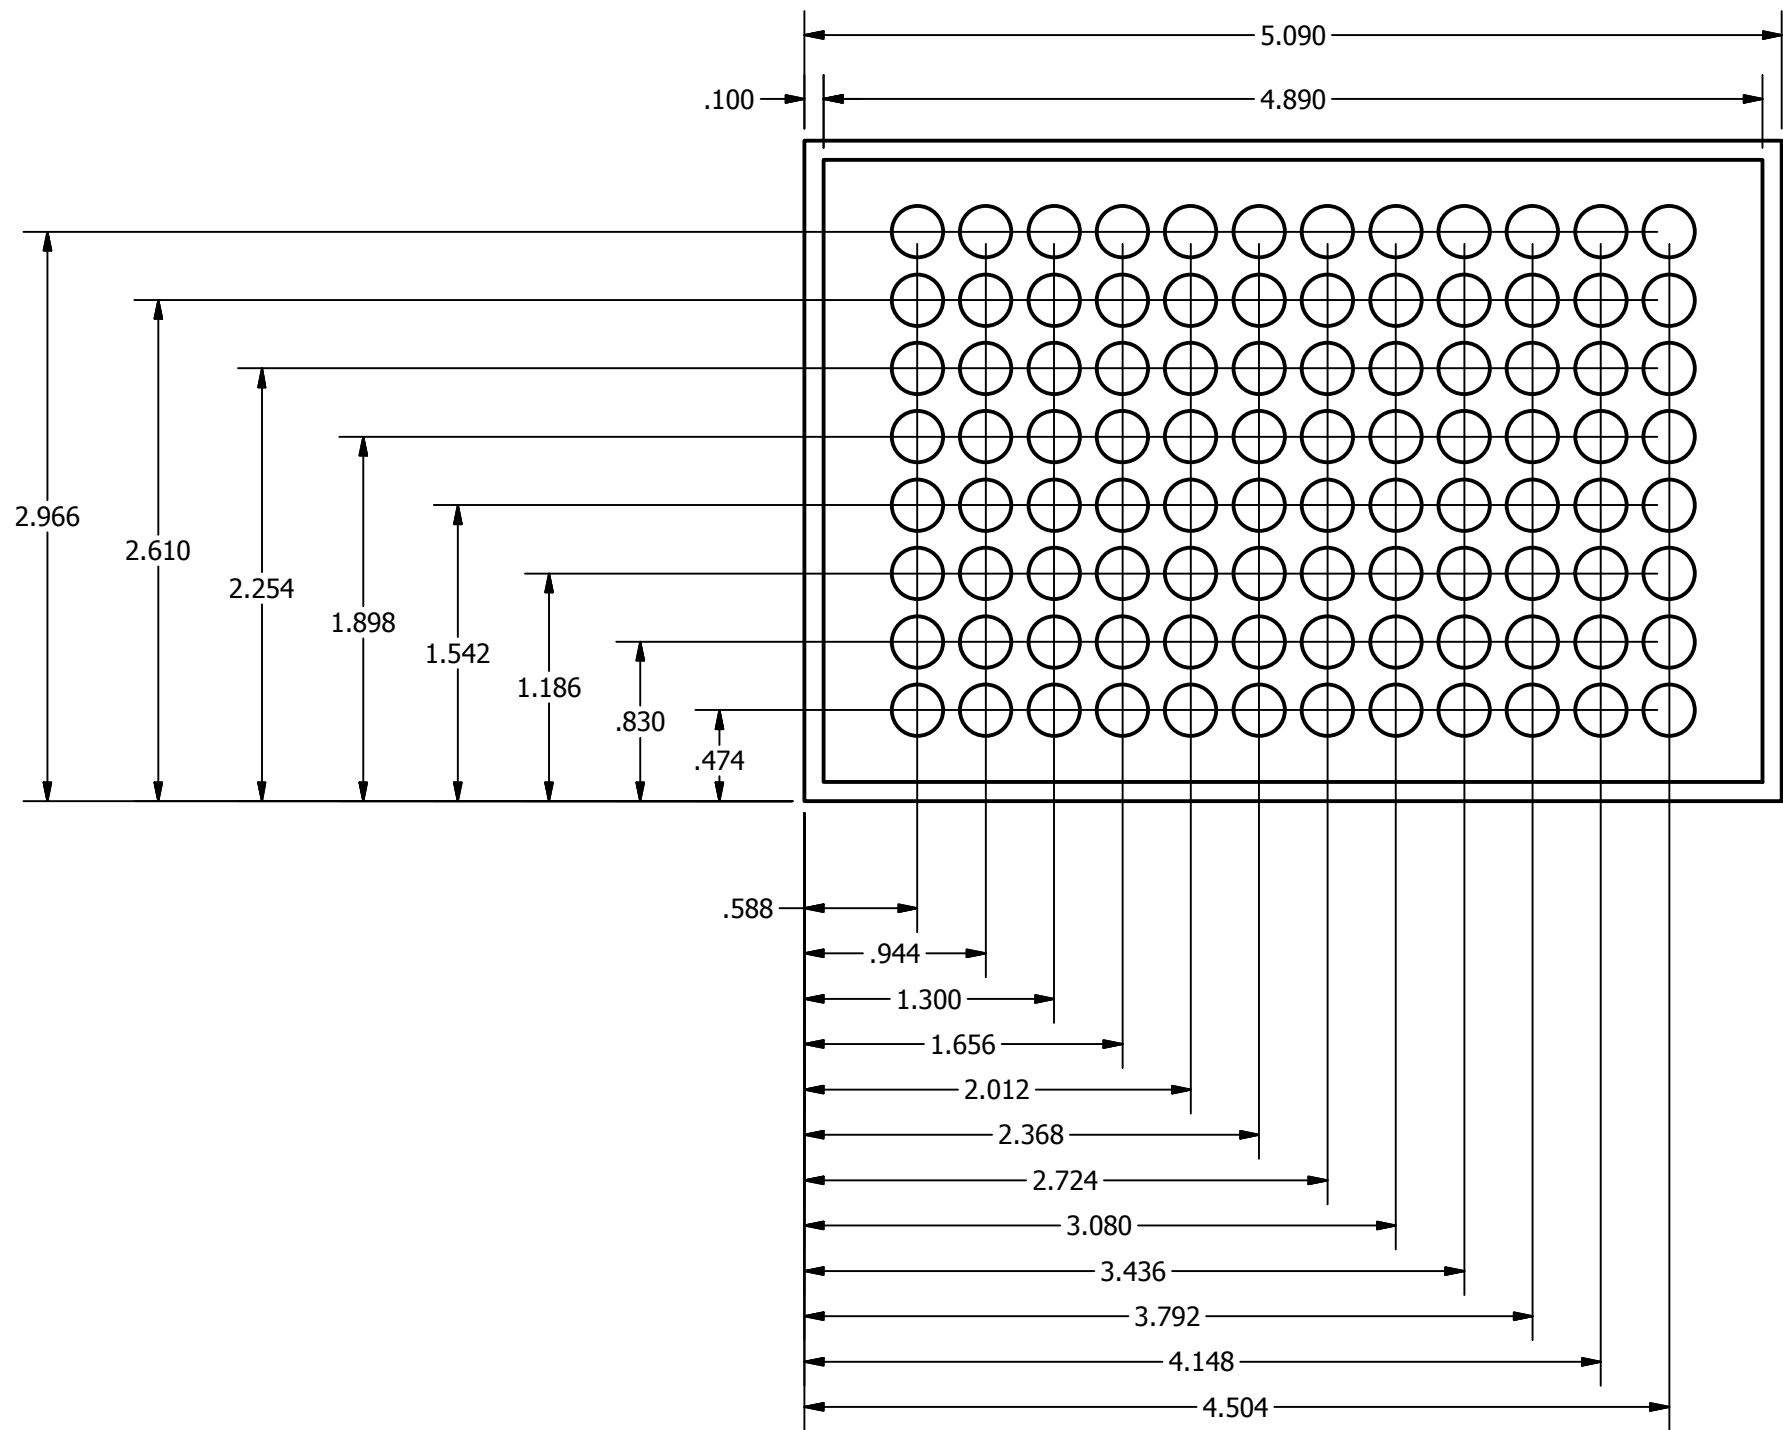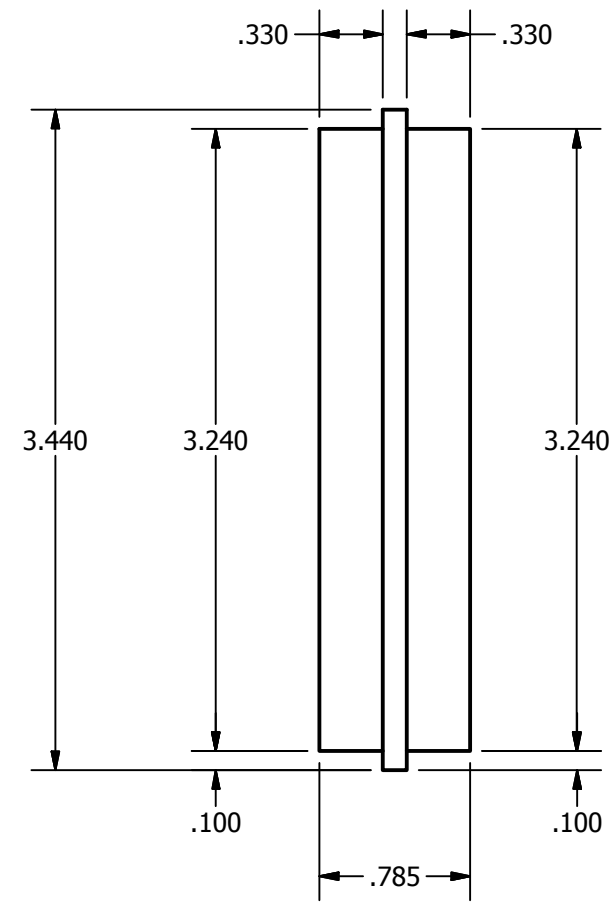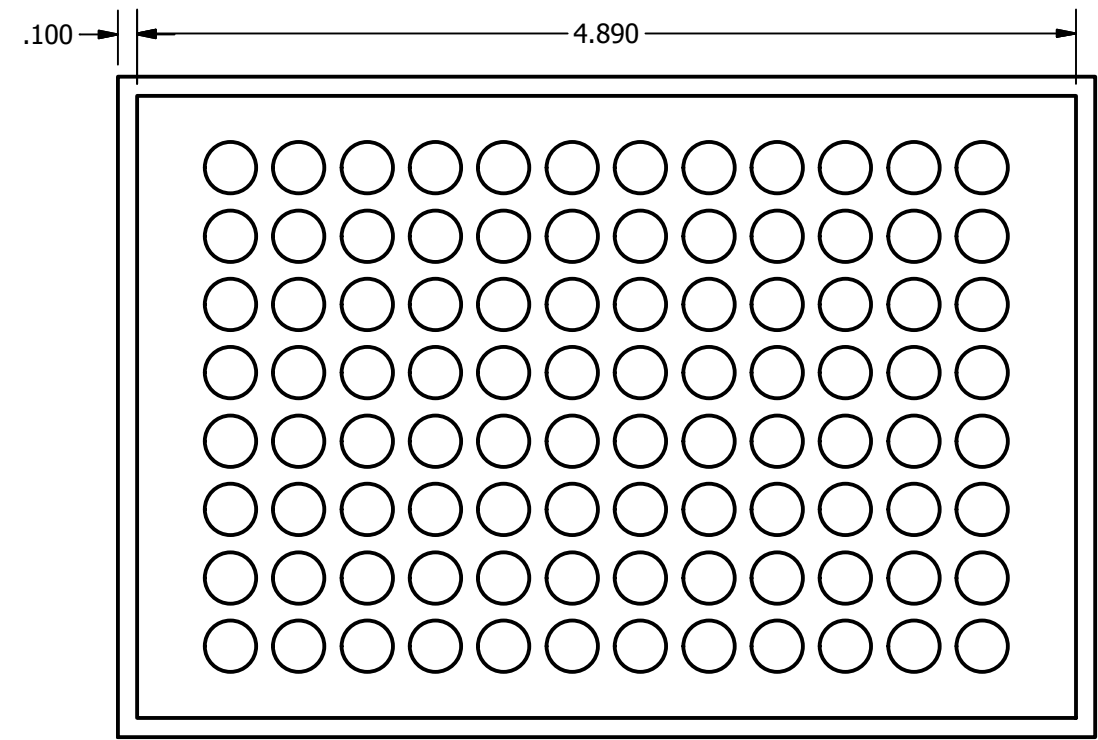

NOTICE:  
 INFORMATION CONTAINED IN THIS DOCUMENT OR ANY REPRODUCTION THEREOF, IS PROPRIETARY INFORMATION AND PROPERTY OF HOWARD HUGHES MEDICAL INSTITUTE. IT SHALL NOT BE DISCLOSED, COPIED, DUPLICATED OR USED FOR MANUFACTURE, PRODUCTION OR PROCUREMENT, WITHOUT THE EXPRESS WRITTEN PERMISSION OF HOWARD HUGHES MEDICAL INSTITUTE.

(UNLESS SPECIFIED OTHERWISE)  
 PRIMARY UNITS: INCHES  
 [SECONDARY UNITS]: MILLIMETERS

PRIMARY TOLERANCES:  
 X.X ± 0.020  
 X.XX ± 0.010  
 X.XXX ± 0.005  
 X.XXXX ± 0.0005  
 ANGULAR ± 0.5 DEG

- DO NOT SCALE DRAWING -  
 THIRD ANGLE PROJECTION:

|                                     |                  |          |                 |
|-------------------------------------|------------------|----------|-----------------|
| <br>HOWARD HUGHES MEDICAL INSTITUTE |                  |          |                 |
| <h3>96 CHAMBER ADAPTER.ipt</h3>     |                  |          |                 |
| SIZE<br>C                           | PART NUMBER<br>1 | REV<br>0 | SHEET<br>1 OF 1 |

4

3

2

1

GENERAL NOTES:

- 1. MATERIAL: STAINLESS STEEL SHIM STOCK
- 2. SPECIAL FINISH:
- 3. SURFACE ROUGHNESS (UNLESS SPECIFIED OTHERWISE):
- 4. INTERPRET DIMENSIONS AND TOLERANCES PER ASME Y14.5M-1994
- 5. DEBURR AND BREAK ALL SHARP EDGES, MAX 0.010" (UNLESS SPECIFIED OTHERWISE)
- 6. PARTS ARE TO BE CLEAN AND FREE OF OIL, GREASE, AND OTHER CONTAMINANTS
- 7. DIMENSIONS INCLUDE CHEMICALLY APPLIED FINISHES IF APPLICABLE

| ZONE |  | REV | REVISION HISTORY DESCRIPTION | DATE | APPROVED |
|------|--|-----|------------------------------|------|----------|
|      |  |     |                              |      |          |

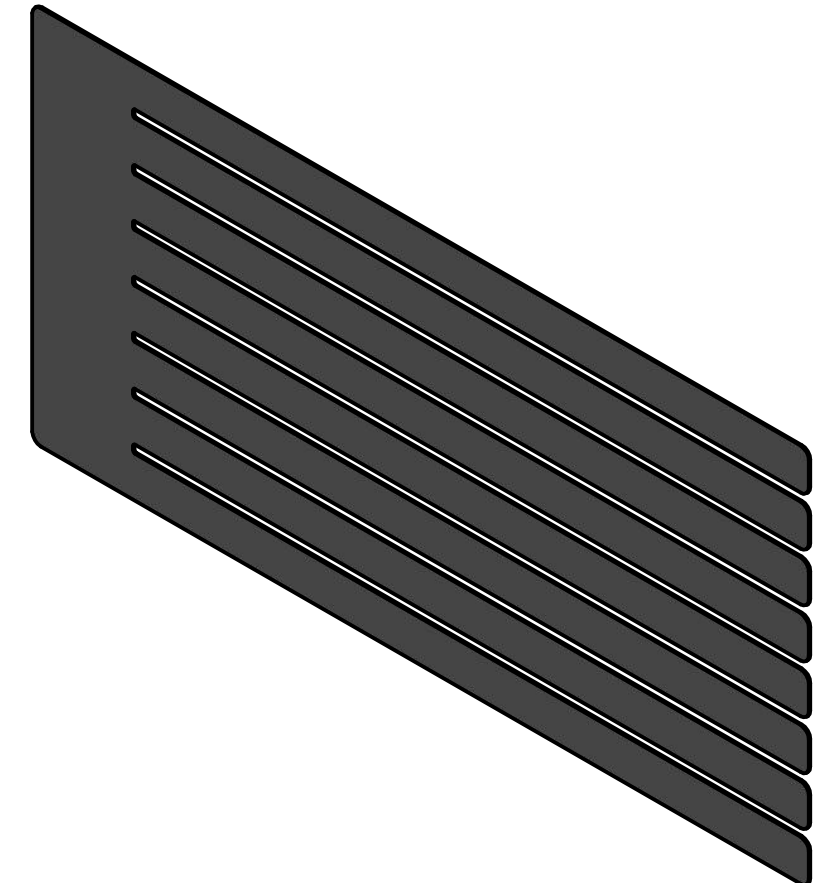

.010

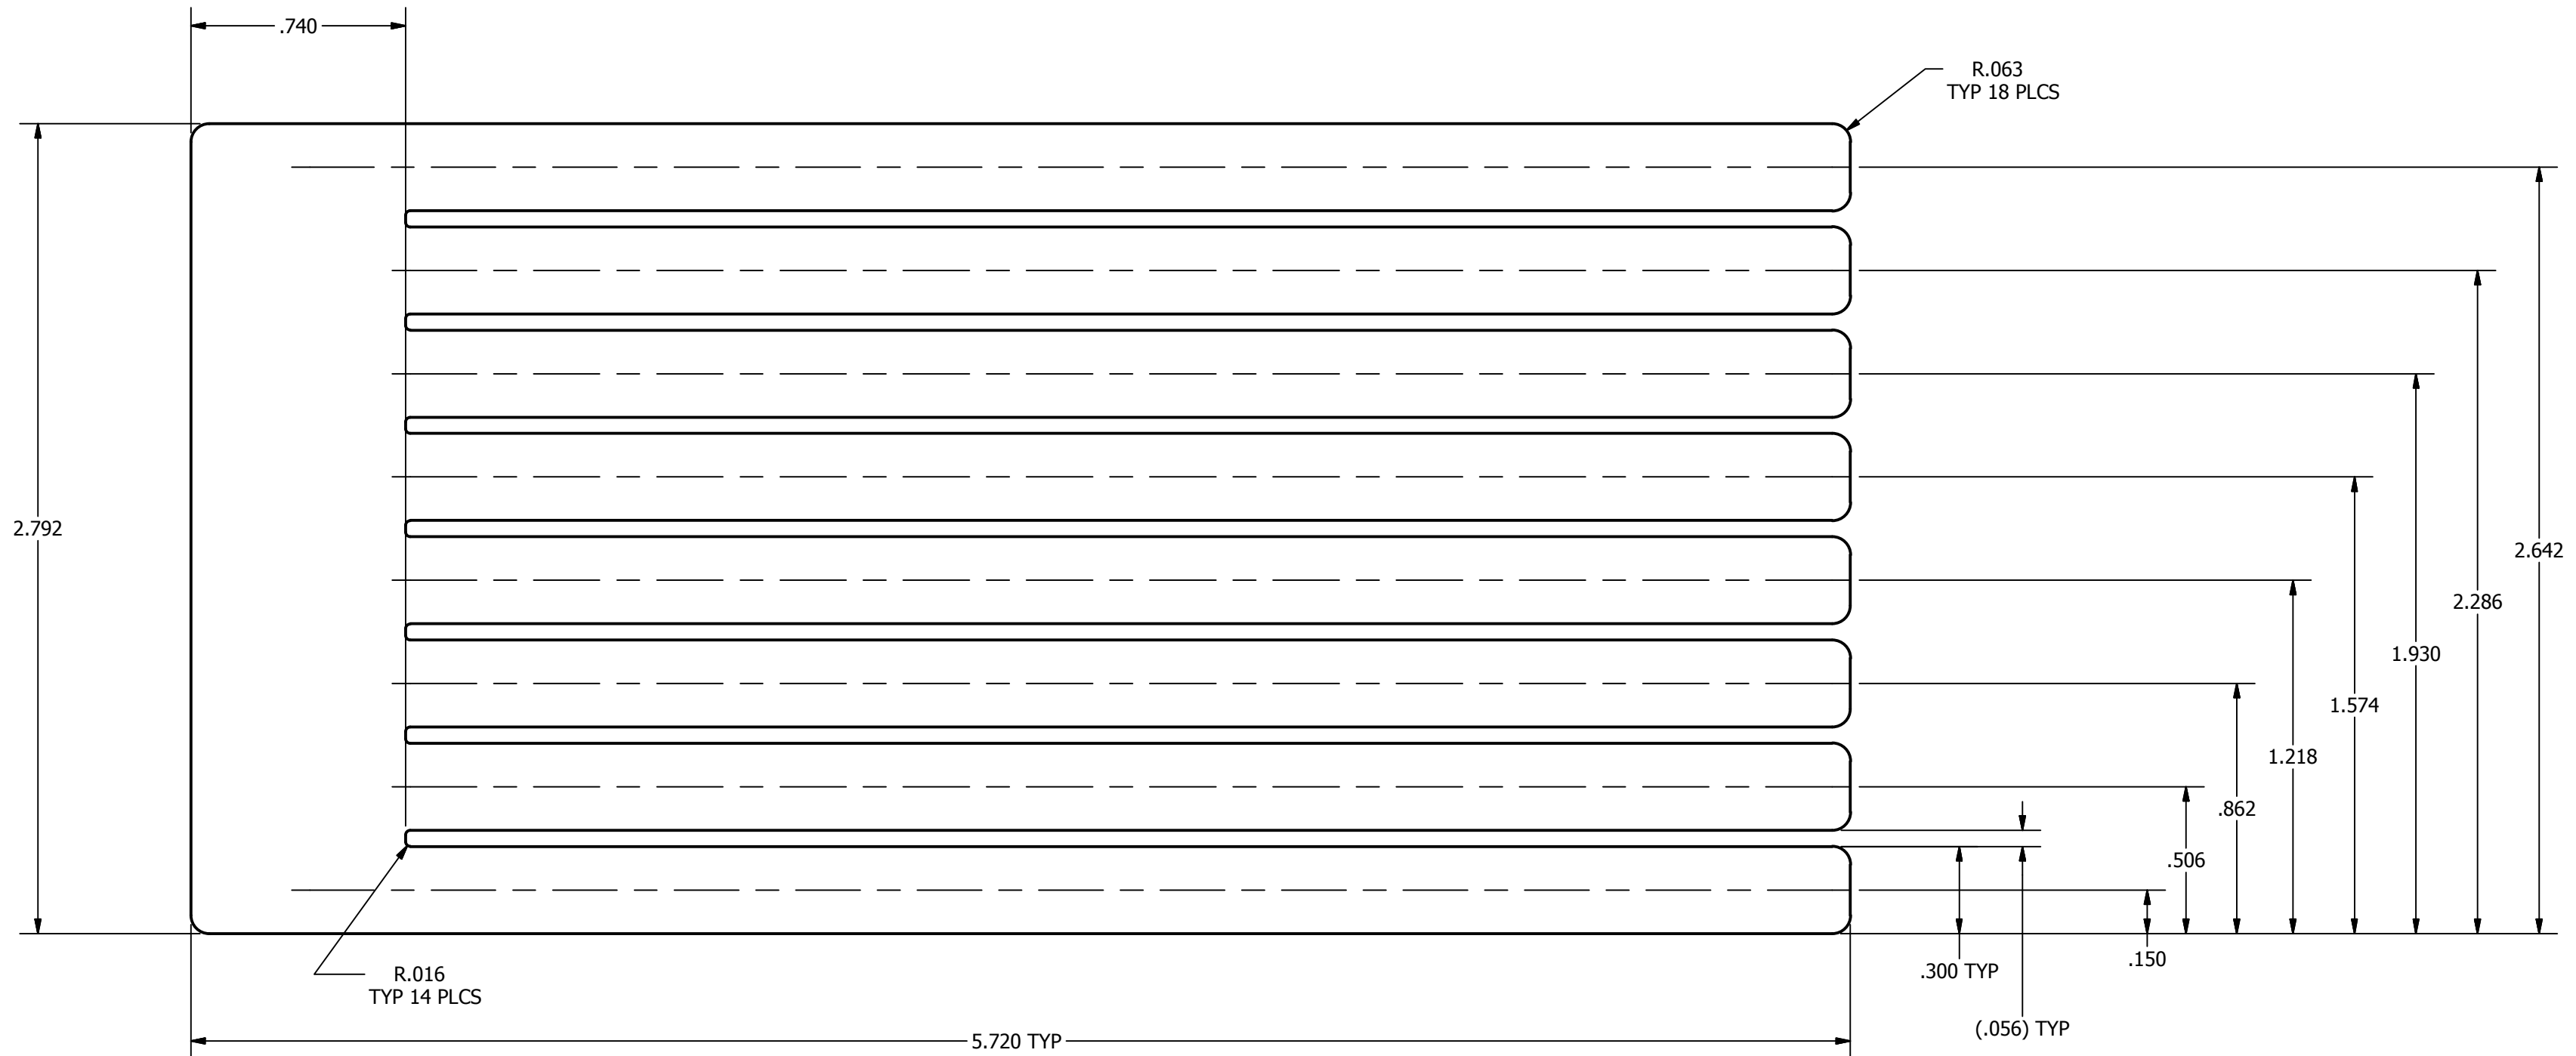

SCALE 2:1

NOTICE:  
 INFORMATION CONTAINED IN THIS DOCUMENT OR ANY REPRODUCTION THEREOF, IS PROPRIETARY INFORMATION AND PROPERTY OF HOWARD HUGHES MEDICAL INSTITUTE. IT SHALL NOT BE DISCLOSED, COPIED, DUPLICATED OR USED FOR MANUFACTURE, PRODUCTION OR PROCUREMENT, WITHOUT THE EXPRESS WRITTEN PERMISSION OF HOWARD HUGHES MEDICAL INSTITUTE.

(UNLESS SPECIFIED OTHERWISE)  
 PRIMARY UNITS: INCHES  
 [SECONDARY UNITS]: MILLIMETERS

PRIMARY TOLERANCES:  
 X.X ± 0.020  
 X.XX ± 0.010  
 X.XXX ± 0.005  
 X.XXXX ± 0.0005  
 ANGULAR ± 0.5 DEG

- DO NOT SCALE DRAWING -  
 THIRD ANGLE PROJECTION:

|                                         |             |     |        |
|-----------------------------------------|-------------|-----|--------|
| <br>HOWARD HUGHES MEDICAL INSTITUTE     |             |     |        |
| <h3>96 CHAMBER PARTITION SLIDE.ipt</h3> |             |     |        |
| SIZE                                    | PART NUMBER | REV | SHEET  |
| C                                       | 1           | 0   | 1 OF 1 |

4

3

2

1
